# Supplementary material for: Mantle-flow diversion beneath the Iranian plateau induced by Zagros’ lithospheric keel
Source: Springer Nature journal article supplement (doi:10.1038/s41598-021-81541-9), 2021-02-02

a)

All splitting measurements projected to the depth of 100 km

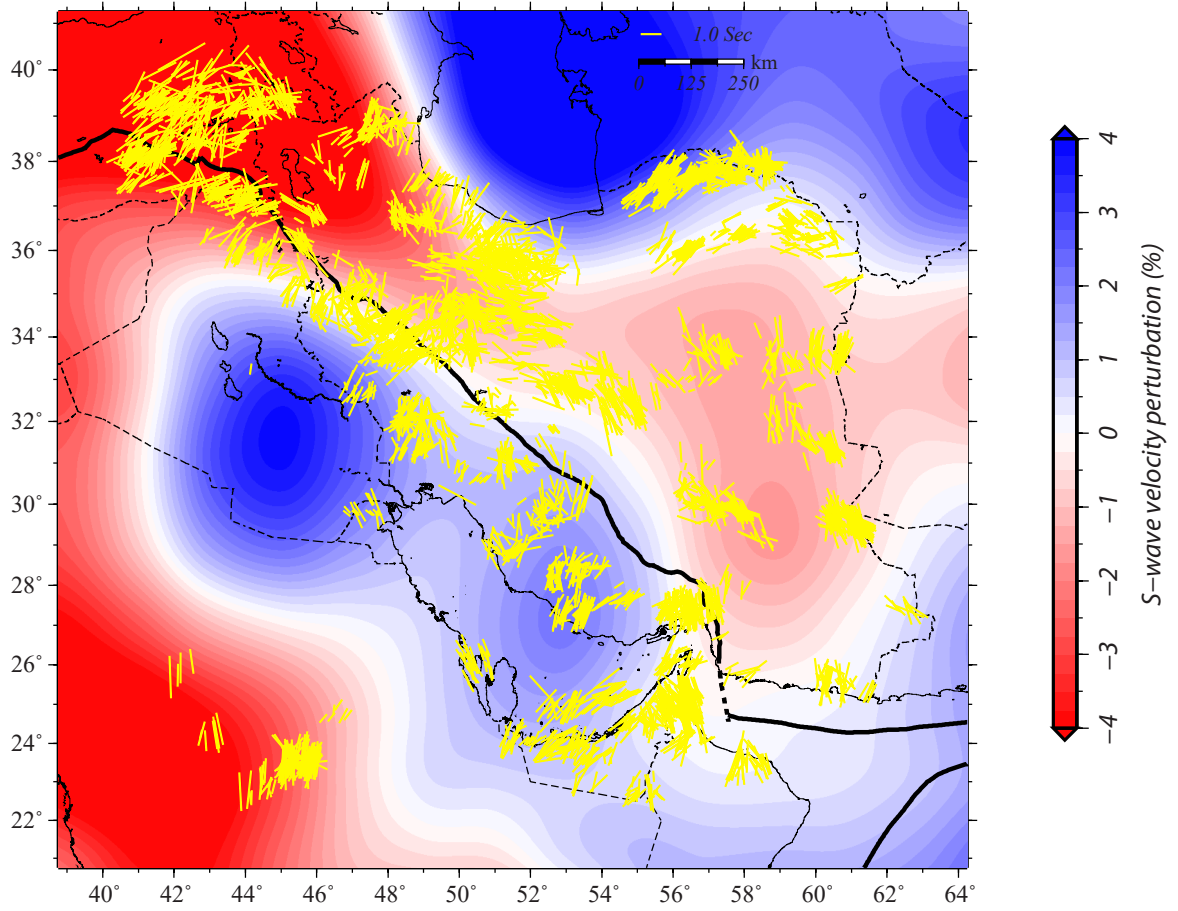

b)

All splitting measurements projected to the depth of 200 km

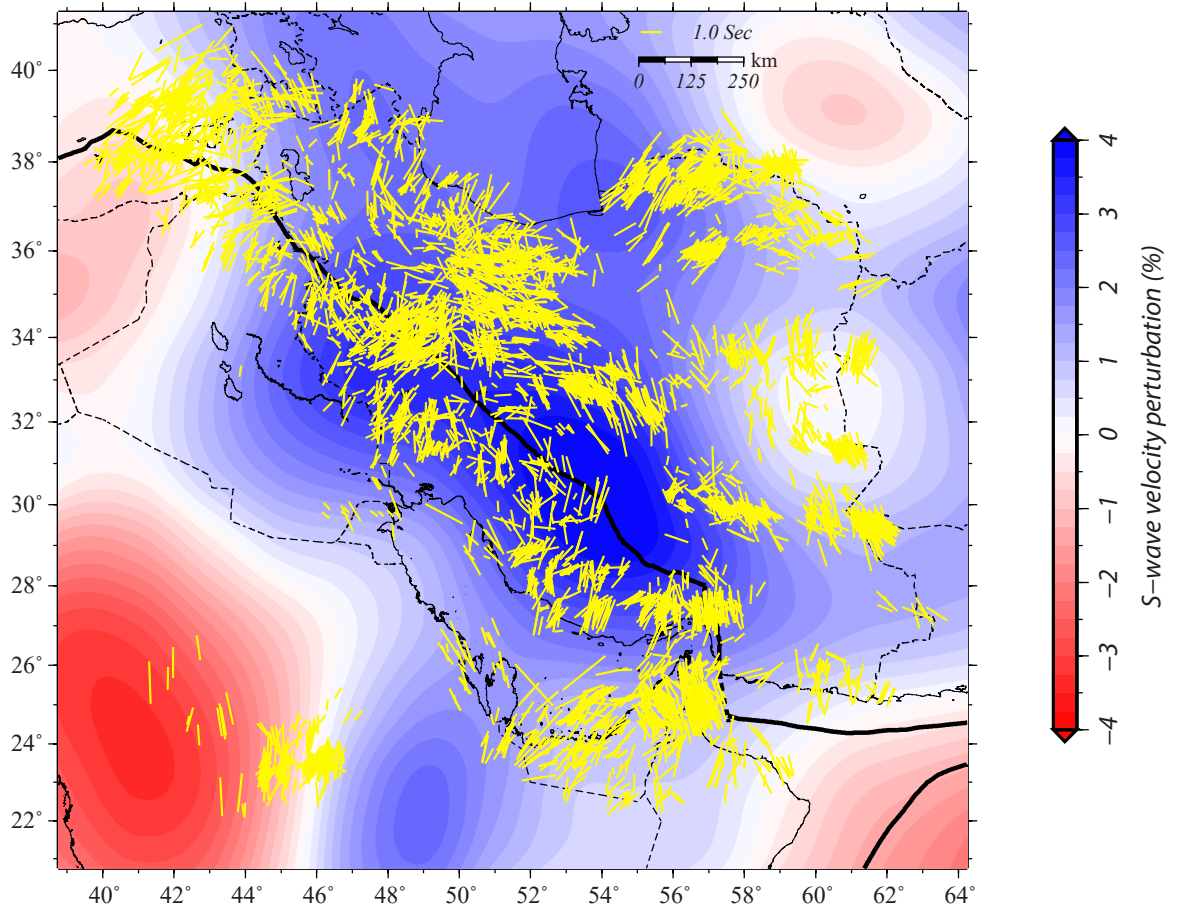

Supplement: MOESM2 [file 41598_2021_81541_MOESM2_ESM.pdf]
