# Supplementary material for: Mantle-flow diversion beneath the Iranian plateau induced by Zagros’ lithospheric keel
Source: Springer Nature journal article supplement (doi:10.1038/s41598-021-81541-9), 2021-02-02

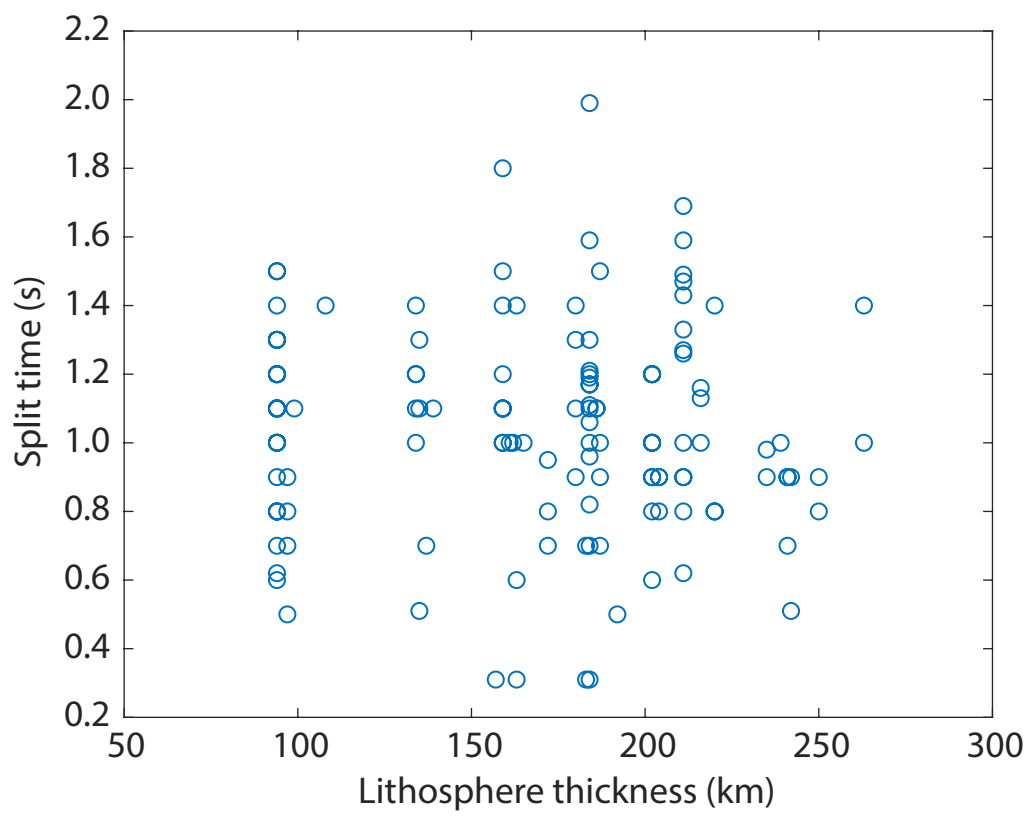

Supplement: MOESM3 [file 41598_2021_81541_MOESM3_ESM.pdf]
