# Supplementary material for: Mantle-flow diversion beneath the Iranian plateau induced by Zagros’ lithospheric keel
Source: Sci Rep. 2021 Feb 2;11:2848. doi: 10.1038/s41598-021-81541-9 (PMC7854601; doi:10.1038/s41598-021-81541-9)
Supplement: Supplementary file 4 — Supplementary Information 4. [file 41598_2021_81541_MOESM4_ESM.xltx]

## Sheet: results_one_layer_final_combine
station	longitude (°)	latitude (°)	phi (°)	dt (sec)
AE.AJN	55	24.56	1	1
AE.JRN	52.85	24.94	31	1.4
AE.MSF	56.16	25.37	-35	1
AE.MZR	53.48	23	24	1.2
AE.SHM	56.14	26.05	38	1.1
AE.SRB	54.23	25.22	64	1.2
BH.SAK	50.54	25.98	-25	1.1
BI.AHRM	51.297	28.865	56	0.31
BI.ASAO	50.026	34.548	16	0.21
BI.BJRD	57.411	37.7	81	0.72
BI.BNDS	56.17	27.4	11	0.9
BI.BSRN	59.13	31.97	-8	0.9
BI.CHBR	60.48	25.6	-4	0.8
BI.CHTH	51.126	35.908	-78	0.51
BI.DAMV	51.971	35.63	81	0.72
BI.GHIR	52.99	28.29	10	0.9
BI.GHVR	51.25	34.48	-61	1
BI.GRMI	47.89	38.81	25	1
BI.KRBR	56.76	29.98	-55	1
BI.MAKU	44.684	39.355	-62	0.31
BI.MRVT	56.09	37.66	44	1
BI.NASN	52.81	32.8	-58	1.4
BI.RMKL	49.81	30.98	13	0.9
BI.SHGR	48.8	32.11	30	1
BI.SHRO	56.01	36.01	52	1.1
BI.SHRT	60.29	33.65	7	1.4
BI.SNGE	47.347	35.093	2	0.62
BI.TABS	57.12	33.65	-27	1.2
BI.THKV	50.879	35.916	62	0.41
BI.YZKH	54.59	32.39	-28	1.4
BI.ZHSF	60.78	29.61	-34	1.1
BI.ZNJK	48.685	36.671	-18	0.31
DN.FAQ	55.59	24.75	-17	1.4
II.ABKT	57.819	37.83	59	0.51
II.ABKT	58.419	38.03	-59	0.41
II.RAYN	45.5	23.52	19	1
II.UOSS	56.2	24.95	-36	1
IL.IR2	50.9	35.66	-37	1.2
IL.IR3	51.02	35.48	-53	1.2
IL.IR4	50.9	35.24	-61	0.9
IL.IR5	50.58	35.21	-39	1.2
IL.IR6	50.43	35.47	-83	0.9
IL.IR7	50.61	35.7	-66	1.5
IQ.BHD	44.39	33.28	8	0.5
IQ.ERBL	44.21	36.38	46	1.7
IQ.KDDA	42.82	37.21	33	1.2
IQ.KEHH	45.05	36.68	-76	1.2
IQ.KEKZ	44.1	35.99	26	1
IQ.KESM	44.2	36.98	65	1
IQ.KSBB	45.71	35.04	25	1.1
IQ.KSJS	45.045	35.396	51	0.51
IQ.KSJS	45.645	35.596	-64	0.41
IQ.KSLY	45.45	35.56	-86	1.3
IQ.KSSS	46.24	35.77	-27	1.2
IQ.KSWW	45.26	36.15	-26	0.9
IQ.MSL	43.15	36.38	41	1.3
IR.ABH1	50.25	30.6	20	0.8
IR.AFRZ	59.01	33.43	-8	0.8
IR.AHWZ	48.64	31.33	28	0.8
IR.AKL	58.75	36.59	-30	0.8
IR.AMIS	49.29	31.67	-20	0.9
IR.ANAR	53.73	33.19	-46	0.8
IR.AZR	45.98	37.68	-39	0.5
IR.BDRS	48.88	33.95	48	0.9
IR.BMDN	48.825	33.672	-76	0.51
IR.BNB	56.54	27.45	0	1
IR.BST	46.89	37.7	14	1.1
IR.BZA	47.86	34.47	52	1
IR.CHMN	57.54	29.86	-48	1
IR.CSN1	49.1	37.56	35	1
IR.DHL1	47.28	32.68	27	0.9
IR.DHR	46.39	34.7	4	0.8
IR.DOB	48.18	33.79	48	0.8
IR.EMG	58.65	37.41	-43	0.5
IR.FIR	52.754	35.642	59	0.31
IR.GAS1	48.84	38.39	20	0.9
IR.GENO	56.17	27.4	9	0.9
IR.GZV	50.22	36.39	-79	0.9
IR.HAGD	49.14	34.82	29	1
IR.HSAM	48.6	34.21	49	1.2
IR.HSB	51.28	35.44	-59	1
IR.JASK	57.87	25.87	66	1.1
IR.JHBN	50.67	32.23	-86	0.9
IR.JHRM	53.58	28.5	57	0.8
IR.JIR1	49.8	36.71	28	0.7
IR.JRKH	60.35	35.91	-89	1.1
IR.JSK1	57.77	25.64	31	0.9
IR.KBAM	58.45	29.14	-47	1.1
IR.KCHF	47.04	34.28	-45	1
IR.KFM	47.85	33.52	51	0.9
IR.KHGB	56.477	30.376	34	0.41
IR.KHNJ	57.71	27.95	15	1
IR.KHSK	57.05	26.76	58	0.7
IR.KLH	51.58	33.32	-80	0.9
IR.KLNJ	51.59	31.01	-15	1
IR.KMR	48.38	33.52	59	0.9
IR.KOO	59.004	32.424	-2	0.62
IR.KRD	59.51	36.78	-52	0.7
IR.KRSH	52.14	33.97	-63	0.8
IR.LAR1	54.37	27.67	60	1.1
IR.LAS	52.96	35.38	10	0.7
IR.LHJ2	50.06	37.17	29	1.2
IR.LIN	46.96	34.92	13	0.9
IR.LMD1	53.16	27.34	26	1
IR.MAHB	45.71	36.77	-36	1.1
IR.MHD	50.67	35.69	-84	0.4
IR.MND	55.39	37.24	39	1
IR.MYA	60.1	36.34	-41	0.8
IR.MZPU	51.57	36.44	46	0.8
IR.NGCH	61.14	25.36	25	1.1
IR.NGRK	56.73	29.64	57	1.1
IR.NHDN	60.05	31.39	-31	1
IR.NIAN	56.83	27.56	-23	1.1
IR.PAR	53.03	29.84	-19	0.9
IR.QABG	49.58	35.71	-77	0.9
IR.QALM	50.65	36.43	43	0.7
IR.QSDN	49.17	36.5	40	1.1
IR.RAM	52.38	31.81	-39	0.5
IR.ROKH	51.07	32.4	26	0.7
IR.RST1	49.63	37.23	23	1.3
IR.SBZV	57.61	36.39	55	0.8
IR.SFB	52.24	34.35	-82	1
IR.SHB	45.62	38.28	-7	0.9
IR.SHI	52.52	29.637	-3	0.31
IR.SHK1	50.88	32.33	10	0.9
IR.SRO	59.47	36.31	-79	0.7
IR.SRVN	62.4	27.4	-45	1.1
IR.SZD1	60.87	29.49	-35	1.3
IR.TABZ	46.33	38.06	-42	0.6
IR.TAHR	47.05	38.49	51	0.7
IR.TBB	51.727	34.995	-76	1
IR.TBJM	60.33	35.27	65	1.3
IR.TEH	51.39	35.75	-62	0.9
IR.TEHA	51.387	35.746	-86	0.72
IR.TKDS	57.12	33.61	-54	0.8
IR.TNSJ	56.61	33.96	7	1
IR.TPRV	56.69	33.03	34	0.9
IR.TVBK	56.76	29.99	-42	0.9
IR.TVRZ	46.67	38.5	72	1.5
IR.VIS	46.85	34.53	-19	0.9
IR.VRN	51.73	35	-71	1.2
IR.ZEF	52.33	32.9	-42	0.8
IR.ZHDN	60.81	29.4	-48	1
IR.ZRDN	56.54	30.97	18	1
KH.BRV	59.29	32.84	61	0.8
KH.KHV	58.63	34.14	-9	1.2
KH.NJV	59.5	36.28	37	0.5
KH.QUV	58.48	37.04	60	0.9
KH.SBV	57.68	36.31	-82	1.4
KO.AKDM	42.98	38.33	49	1.1
KO.CUKT	43.61	37.25	56	1.2
KO.GURO	42.03	38.55	35	1
KO.KARO	41.05	39.31	52	1.2
KO.KOPR	41.85	39.99	56	1.2
KO.MLAZ	42.55	39.14	27	1.1
KO.SVAN	41.2	38.15	46	1.2
KO.VANB	43.41	38.51	49	1
KO.VRTB	41.46	39.16	54	1.5
KW.MIB	47.34	29.8	-44	0.7
OM.ASH	56.06	24.68	-23	1.3
OM.BID	58.13	23.52	-7	1.3
OM.SOH	56.53	24.13	29	1.1
UE.GHWR	52.88	23.96	54	1.3
UE.MZWR	53.88	23.76	44	0.9
UE.SAK	50.54	25.98	-20	0.6
UE.SLWR	51.69	24.07	28	0.8
UE.UMZA	55.16	22.71	14	0.7
XG.AHLT	42.48	38.75	53	1.4
XG.BTLS	42.12	38.43	27	1.1
XG.BYKN	41.78	38.17	44	1.1
XG.CMCY	43.2	39.92	68	1.3
XG.DGSU	42.73	39.13	51	1.5
XG.HAMR	42.99	39.61	77	1.8
XG.HINS	41.7	39.35	52	1.3
XG.HRSN	42.29	39.95	34	1.2
XG.KTLN	41.71	37.95	30	0.9
XG.KYPR	41.17	37.56	58	1.1
XG.MUSH	41.48	38.76	45	1.5
XG.SILN	41.04	38.14	47	1.2
XI.AFIF	43.04	23.93	-5	1.4
XI.HALM	44.32	22.85	4	1
XI.RAYN	45.5	23.52	11	1.1
XI.RIYD	46.64	24.72	31	0.6
XI.UQSK	42.36	25.79	-1	1.5
XY.J3	51.39	36.64	-56	0.8
XY.K3	51.78	36.38	88	1.5
XY.N1	51.91	36.44	83	0.8
XY.N6	51.56	36.23	50	0.8
XY.N8	51.31	36	61	0.7
XY.T1	52.12	36.33	-59	1.4
XY.T5	52.02	36.19	73	1.1
XY.T6	52.29	35.98	82	0.6
XY.T7	52.16	35.88	79	0.7
YB.A1	51.31	29.44	6	1.4
YB.A2	51.78	29.79	53	0.5
YB.A3	51.86	29.35	-14	0.7
YB.B1	52.58	29.84	-31	0.8
YB.B2	52.5	30.19	-4	1.2
YB.B3	53.06	30.13	17	1.2
YB.C2	53.81	32.15	-17	1.3
YB.D1	54.51	32.04	-32	0.7
YB.D2	54.71	32.43	-21	1.3
YB.D3	54.09	32.41	-35	1.3
YB.M1	51.32	29.05	-37	0.6
YB.M2	52.23	29.71	8	0.6
YB.M3	53.25	30.25	16	1.7
YB.M4	53.28	30.71	-1	1
YB.M5	52.85	31.05	-27	1.4
YB.M6	53.81	31.58	-12	1.7
YB.M7	55.2	32.6	-17	1.1
YB.M8	55.48	32.97	-46	0.9
ZH.E3	48.16	33.53	50	1
ZH.E5	49.01	33.44	39	0.9
ZH.G1	49.39	34.02	-23	0.9
ZH.V1	48.72	33.78	33	0.4
ZH.V2	48.69	33.77	89	0.5
ZH.Y6	49.25	33.98	39	0.7
ZH.Y7	49.07	33.97	53	0.8
ZH.Y8	48.94	33.91	66	1
ZH.Z4	50.32	34.51	71	1.4
ZH.Z5	50.82	34.75	-76	0.9
ZH.Z6	50.88	34.94	-58	0.8
ZH.Z7	50.98	35.09	-31	1
ZH.Z8	50.9	35.24	-57	0.6
ZJ.K2	51.541	35.963	-60	0.92
ZJ.T6	52.293	35.976	-85	0.72
