# Supplementary material for: Mantle-flow diversion beneath the Iranian plateau induced by Zagros’ lithospheric keel
Source: Sci Rep. 2021 Feb 2;11:2848. doi: 10.1038/s41598-021-81541-9 (PMC7854601; doi:10.1038/s41598-021-81541-9)
Supplement: Supplementary file 5 — Supplementary Information 5. [file 41598_2021_81541_MOESM5_ESM.xltx]

## Sheet: All_individual_SKS_splitting_me
Station	Sta_Lat	Sta_Lon	Event	Eve_Lat	Eve_Lon	Baz	Dist	Depth	Phase	Filter(Sec)	Max. corr.	Phi	std_phi	dt	std_dt	Sv_Sh_correc	Sv_Sh_uncorrec	Quality
AE.AJN	24.56	55	2014-174-19-19-15	-29.98	-177.73	109	133	20	PKSbc	5-20s	0.98	-56	42	0.52	0.58	35.66	9.63	fair
AE.AJN	24.56	55	2014-174-20-53-09	51.85	178.74	31	89	109	SKKSac	5-20s	0.98	42	52	1.25	1.65	7.76	4.15	fair
AE.AJN	24.56	55	2014-175-03-15-35	52.21	176.7	32	88	4	SKSac	5-20s	0.98	42	5	1.78	0.64	20.36	5.44	fair
AE.AJN	24.56	55	2014-180-15-52-23	-14.78	-175.26	88	132	9	PKSbc	5-20s	0.97	-49	30	0.6	0.46	12.31	3.66	fair
AE.AJN	24.56	55	2014-202-14-54-41	-19.8	-178.4	96	131	615	PKSbc	5-20s	0.98	-12	36	1.17	1.06	12.12	3.96	fair
AE.AJN	24.56	55	2014-235-22-32-23	-32.69	-71.44	247	133	32	PKSbc	5-20s	0.99	37	28	0.69	0.44	17.33	3.93	fair
AE.AJN	24.56	55	2014-235-22-32-23	-32.69	-71.44	247	133	32	SKKSac	5-20s	0.95	49	44	1.24	1.09	7.21	3.34	fair
AE.AJN	24.56	55	2014-236-23-21-45	-14.6	-73.57	272	131	101	PKSbc	5-20s	0.99	44	23	0.88	0.37	10.45	2.56	fair
AE.AJN	24.56	55	2014-236-23-21-45	-14.6	-73.57	272	131	101	SKKSac	5-20s	0.95	50	15	1.02	0.18	17.79	2.63	good
AE.AJN	24.56	55	2014-287-03-51-34	12.53	-88.12	312	128	40	SKSac	5-20s	Null	Null	Null	Null	Null	13.15	6.17	goodNull
AE.AJN	24.56	55	2014-305-18-57-22	-19.69	-177.76	95	131	434	PKSbc	5-20s	0.99	-66	54	0.89	1.29	10.51	3.88	fair
AE.AJN	24.56	55	2014-305-18-57-22	-19.69	-177.76	95	131	434	SKSac	5-20s	0.95	-12	54	1.55	1.99	7.57	3.2	fair
AE.AJN	24.56	55	2014-320-22-33-20	-37.65	179.66	119	131	22	SKKSac	5-20s	0.94	10	11	1.45	1.05	10.06	3.4	fair
AE.AJN	24.56	55	2014-342-08-54-52	7.94	-82.69	303	128	20	SKKSac	5-20s	Null	Null	Null	Null	Null	10.35	3.86	fairNull
AE.AJN	24.56	55	2015-023-03-47-27	-17.03	168.52	97	118	220	SKKSac	5-20s	Null	Null	Null	Null	Null	12.74	10.95	goodNull
AE.AJN	24.56	55	2015-023-03-47-27	-17.03	168.52	97	118	220	SKSac	5-20s	0.99	-22	37	0.47	0.47	30.17	6.5	fair
AE.AJN	24.56	55	2015-047-22-00-53	-55.52	-28.26	216	106	13	SKSac	5-20s	1	40	4	1.7	1.03	52.51	13.34	fair
AE.AJN	24.56	55	2015-077-18-27-29	-36.12	-73.52	243	135	13	PKSbc	5-20s	0.95	17	37	0.57	0.97	13.21	4.91	fair
AE.AJN	24.56	55	2015-082-04-51-38	-18.35	-69.17	265	128	130	SKKSac	5-20s	0.95	59	27	1.63	0.93	6.72	2.11	fair
AE.AJN	24.56	55	2015-089-08-18-01	-15.39	-172.94	88	134	15	PKSbc	5-20s	1	-59	20	0.74	0.32	31.39	4.04	good
AE.AJN	24.56	55	2015-089-08-18-01	-15.39	-172.94	88	134	15	SKKSac	5-20s	0.95	12	63	1.09	2.57	8.31	4.31	fair
AE.AJN	24.56	55	2015-089-08-48-25	-15.5	-173.03	88	134	11	PKSbc	5-20s	1	-47	20	0.69	0.2	29.65	4.1	fair
AE.AJN	24.56	55	2015-089-08-48-25	-15.5	-173.03	88	134	11	SKKSac	5-20s	Null	Null	Null	Null	Null	12.42	5.81	goodNull
AE.AJN	24.56	55	2015-140-22-48-53	-10.88	164.17	92	112	11	SKKSac	5-20s	0.99	11	6	1.69	0.66	27.39	5.88	fair
AE.AJN	24.56	55	2015-140-22-48-53	-10.88	164.17	92	112	11	SKKSac	5-20s	Null	Null	Null	Null	Null	5.94	5.54	fairNull
AE.AJN	24.56	55	2015-140-22-48-53	-10.88	164.17	92	112	11	SKSac	5-20s	0.95	-47	16	0.42	0.31	5.6	4.74	fair
AE.AJN	24.56	55	2015-171-02-10-07	-36.36	-73.81	242	135	11	PKSbc	5-20s	0.96	25	33	0.38	1.7	11.2	6.3	fair
AE.AJN	24.56	55	2015-222-04-12-15	-9.34	158.05	93	106	22	SKSac	5-20s	0.98	-45	42	0.7	1.91	8.93	4.16	fair
AE.AJN	24.56	55	2015-224-18-49-24	-9.33	157.88	93	105	6	SKSac	5-20s	0.99	-69	15	1.1	0.55	20.1	4.15	fair
AE.AJN	24.56	55	2015-261-09-10-44	-32.37	-72.23	248	133	8	PKSbc	5-20s	0.99	44	31	0.73	0.48	29.46	5.44	fair
AE.AJN	24.56	55	2015-293-21-52-02	-14.86	167.3	95	116	135	SKSac	5-20s	0.99	-67	58	0.82	1.54	12.84	4.97	fair
AE.AJN	24.56	55	2015-311-07-04-31	-29.46	-72.3	252	133	13	SKKSac	5-20s	0.97	31	23	1.42	0.51	8.42	1.79	fair
AE.AJN	24.56	55	2015-311-07-31-43	-30.88	-71.45	250	133	46	PKSbc	5-20s	0.98	49	38	1.07	0.84	11.84	3.47	fair
AE.AJN	24.56	55	2015-328-22-50-54	-10.06	-71.02	276	127	621	SKKSac	5-20s	0.98	48	12	1.63	0.33	11.04	1.34	fair
AE.AJN	24.56	55	2015-328-22-50-54	-10.06	-71.02	276	127	621	SKSac	5-20s	0.97	55	32	0.48	0.67	5.8	3.86	fair
AE.AJN	24.56	55	2015-331-21-00-22	-24.83	-70.6	258	131	34	PKSbc	5-20s	0.98	63	20	1.17	0.75	16.02	4.21	fair
AE.AJN	24.56	55	2016-001-02-00-39	-50.56	139.45	139	105	10	SKSac	5-20s	Null	Null	Null	Null	Null	14.2	5.2	goodNull
AE.AJN	24.56	55	2016-032-19-00-46	-30.75	-179.95	110	131	391	PKSbc	5-20s	0.98	-4	38	0.66	0.63	12.36	4.27	fair
AE.AJN	24.56	55	2016-041-00-33-05	-30.57	-71.58	250	133	29	PKSbc	5-20s	0.99	54	14	1.08	0.49	23.18	4.09	fair
AE.AJN	24.56	55	2016-097-06-58-48	-14.07	166.62	95	115	24	SKSac	5-20s	0.95	-49	41	0.6	0.68	6.37	3.27	fair
AE.AJN	24.56	55	2016-110-05-25-39	-55.73	-27.23	216	106	14	SKSac	5-20s	Null	Null	Null	Null	Null	20.04	10.26	goodNull
AE.AJN	24.56	55	2016-148-04-08-43	-20.81	-178.65	97	131	567	SKKSac	5-20s	0.98	-40	24	0.81	0.33	9.92	2.79	fair
AE.AJN	24.56	55	2016-149-05-38-50	-21.97	-178.2	98	131	405	PKSbc	5-20s	0.99	-34	36	0.38	0.47	16.19	5.21	good
AE.AJN	24.56	55	2016-149-09-46-59	-56.24	-26.93	215	106	78	SKSac	5-20s	0.99	48	70	0.72	1.25	16.75	7.68	fair
AE.AJN	24.56	55	2016-166-13-49-22	-18.76	168.83	99	119	111	SKSac	5-20s	0.99	-23	55	0.38	1.7	11.31	7.24	fair
AE.AJN	24.56	55	2016-195-12-11-12	-28	-176.44	106	134	12	PKSbc	5-20s	0.99	7	7	1.23	2.17	12.5	6.45	fair
AE.AJN	24.56	55	2016-207-19-38-45	-2.97	148.04	91	94	14	SKSac	5-20s	0.97	-36	24	0.42	0.41	5.01	4.07	fair
AE.AJN	24.56	55	2016-232-07-32-22	-55.28	-31.88	217	108	10	SKSac	5-20s	Null	Null	Null	Null	Null	34.4	11.67	goodNull
AE.AJN	24.56	55	2016-268-21-28-41	-19.78	-178.24	96	131	596	SKKSac	5-20s	0.98	-75	20	1.07	0.72	15.7	6.37	fair
AE.JRN	24.94	52.85	2015-023-03-47-27	-17.03	168.52	96	120	220	SKSac	5-20s	0.99	27	10	1.58	0.62	14.57	2.69	fair
AE.JRN	24.94	52.85	2015-028-02-43-19	-20.97	-178.3	96	133	484	PKSbc	5-20s	0.99	21	32	1.53	1.41	9.02	3.26	fair
AE.JRN	24.94	52.85	2015-112-22-57-15	-12.04	166.43	92	116	72	SKKSac	5-20s	0.94	37	23	1.23	0.68	6.61	2.12	fair
AE.JRN	24.94	52.85	2015-112-22-57-15	-12.04	166.43	92	116	72	SKSac	5-20s	0.98	27	10	1.73	0.46	12.9	1.84	good
AE.JRN	24.94	52.85	2015-191-04-12-42	-9.31	158.4	92	108	12	SKSac	5-20s	0.93	30	21	1.23	0.66	10.09	2.64	fair
AE.JRN	24.94	52.85	2015-250-09-13-56	-32.82	-177.86	112	135	17	SKSac	5-20s	0.96	43	15	1.3	0.65	17.3	3.21	fair
AE.JRN	24.94	52.85	2015-260-03-55-15	-31.42	-71.69	249	131	27	PKSbc	5-20s	0.98	35	31	0.83	0.58	7.62	3.1	fair
AE.JRN	24.94	52.85	2015-260-04-10-27	-31.52	-71.8	249	131	23	PKSbc	5-20s	0.99	22	34	0.66	0.54	7.24	3.56	fair
AE.JRN	24.94	52.85	2015-261-09-10-44	-32.37	-72.23	248	132	8	PKSbc	5-20s	0.95	26	24	0.62	0.38	4.56	2.99	fair
AE.JRN	24.94	52.85	2015-269-02-51-18	-30.82	-71.32	250	131	46	PKSbc	5-20s	0.99	32	15	1.02	0.23	10.47	1.94	fair
AE.JRN	24.94	52.85	2015-293-21-52-02	-14.86	167.3	94	118	135	SKSac	5-20s	0.99	21	13	1.75	1.03	11.65	2.94	fair
AE.JRN	24.94	52.85	2016-094-08-23-52	-14.32	166.85	94	117	26	SKKSac	5-20s	0.97	27	58	1.26	2.75	5.34	2.75	fair
AE.JRN	24.94	52.85	2016-094-08-23-52	-14.32	166.85	94	117	26	SKSac	5-20s	0.98	18	8	1.62	0.63	15.91	3.47	fair
AE.JRN	24.94	52.85	2016-097-06-58-48	-14.07	166.62	94	117	24	SKSac	5-20s	0.99	27	10	1.13	0.4	13.36	2.93	fair
AE.JRN	24.94	52.85	2016-098-03-32-53	-13.98	166.59	93	117	27	SKSac	5-20s	0.99	22	10	1.56	0.64	13.96	3.11	fair
AE.JRN	24.94	52.85	2016-111-08-33-47	0.64	-80.21	292	128	14	SKKSac	5-20s	0.95	42	49	1.47	1.97	6.13	2.65	fair
AE.JRN	24.94	52.85	2016-111-08-33-47	0.64	-80.21	292	128	14	SKSac	5-20s	0.98	48	10	1.49	0.42	17.21	2.82	fair
AE.JRN	24.94	52.85	2016-148-04-08-43	-20.81	-178.65	96	133	567	PKSbc	5-20s	0.99	28	11	1.6	0.61	12.55	2.35	fair
AE.JRN	24.94	52.85	2016-149-05-38-50	-21.97	-178.2	97	133	405	PKSbc	5-20s	0.99	25	9	1.69	0.59	13.1	2.57	fair
AE.JRN	24.94	52.85	2016-149-09-46-59	-56.24	-26.93	215	105	78	SKSac	5-20s	0.98	42	21	2.24	0.99	13	4.03	fair
AE.JRN	24.94	52.85	2016-166-13-49-22	-18.76	168.83	98	121	111	SKSac	5-20s	0.98	31	8	1.42	0.29	20.86	2.4	fair
AE.JRN	24.94	52.85	2016-171-09-47-23	-20.28	169.07	99	121	13	SKSac	5-20s	0.98	26	8	1.78	0.53	29.27	3.82	fair
AE.JRN	24.94	52.85	2016-207-19-38-45	-2.97	148.04	91	96	14	SKSac	5-20s	1	24	14	1.77	0.77	12.14	2.46	fair
AE.JRN	24.94	52.85	2016-217-14-15-12	-22.33	-66.01	259	124	270	SKKSac	5-30s	0.96	33	22	1.44	0.38	5.57	1.65	fair
AE.JRN	24.94	52.85	2016-329-18-43-47	11.91	-88.9	310	128	10	SKKSac	5-30s	0.99	-42	5	2.79	1.22	16.18	4.41	fair
AE.JRN	24.94	52.85	2016-329-18-43-47	11.91	-88.9	310	128	10	SKSac	5-20s	Null	Null	Null	Null	Null	10.84	6.11	goodNull
AE.JRN	24.94	52.85	2016-360-14-22-27	-43.4	-73.94	233	133	38	PKSbc	5-30s	0.99	-15	31	0.9	0.76	14.97	3.99	fair
AE.MSF	25.37	56.16	2014-174-19-19-15	-29.98	-177.73	108	132	20	PKSbc	5-20s	0.97	-29	33	0.74	0.9	8.8	3.92	fair
AE.MSF	25.37	56.16	2014-174-20-06-20	-29.94	-177.61	108	133	27	PKSbc	5-20s	0.92	-45	39	1.05	1.18	8.62	2.77	fair
AE.MSF	25.37	56.16	2014-180-07-52-55	-55.47	-28.37	216	108	8	SKKSac	5-20s	0.98	-23	36	1.13	1.36	12.33	3.45	fair
AE.MSF	25.37	56.16	2014-180-07-52-55	-55.47	-28.37	216	108	8	SKSac	5-20s	0.99	-59	73	1.34	1.97	46.11	14.43	fair
AE.MSF	25.37	56.16	2014-180-15-52-23	-14.78	-175.26	88	131	9	PKSbc	5-20s	0.92	-17	63	1.25	1.67	7.12	3.18	fair
AE.MSF	25.37	56.16	2014-184-19-50-07	-30.46	-176.45	109	134	35	SKKSac	5-20s	0.96	-39	23	1.29	0.27	3.49	1.38	fair
AE.MSF	25.37	56.16	2014-188-11-23-54	14.72	-92.46	319	130	53	SKSac	5-20s	0.98	-50	22	1.57	1.27	15.29	5.44	fair
AE.MSF	25.37	56.16	2014-200-12-27-10	-15.82	-174.45	89	132	227	PKSbc	5-20s	0.98	-26	15	0.87	0.35	17.41	2.97	fair
AE.MSF	25.37	56.16	2014-202-14-54-41	-19.8	-178.4	95	130	615	PKSbc	5-20s	0.99	-38	21	0.78	0.28	17.33	3.27	fair
AE.MSF	25.37	56.16	2014-202-14-54-41	-19.8	-178.4	95	130	615	SKSac	5-20s	0.99	-18	56	0.8	1.27	13.57	4.96	fair
AE.MSF	25.37	56.16	2014-210-10-46-14	17.68	-95.65	324	129	107	SKKSac	5-20s	Null	Null	Null	Null	Null	10.62	5.45	goodNull
AE.MSF	25.37	56.16	2014-235-22-32-23	-32.69	-71.44	248	134	32	PKSbc	5-20s	0.98	-45	53	0.82	1.18	12.32	4.5	fair
AE.MSF	25.37	56.16	2014-236-23-21-45	-14.6	-73.57	273	132	101	PKSbc	5-20s	0.97	-19	67	0.48	1.79	8.48	5.7	fair
AE.MSF	25.37	56.16	2014-236-23-21-45	-14.6	-73.57	273	132	101	SKKSac	5-20s	0.98	-47	31	0.43	0.58	7.29	4.75	fair
AE.MSF	25.37	56.16	2014-267-11-16-15	-23.8	-66.63	259	128	224	SKKSac	5-20s	0.99	-26	7	1.26	0.35	24.06	3.83	fair
AE.MSF	25.37	56.16	2014-305-18-57-22	-19.69	-177.76	95	130	434	PKSbc	5-20s	0.97	-34	39	0.82	0.94	7.12	2.91	fair
AE.MSF	25.37	56.16	2014-305-18-57-22	-19.69	-177.76	95	130	434	SKSac	5-20s	0.99	-53	43	0.86	1.01	13.13	4.08	fair
AE.MSF	25.37	56.16	2015-023-03-47-27	-17.03	168.52	97	117	220	SKKSac	5-20s	0.95	-51	24	1	0.57	15.1	3.17	fair
AE.MSF	25.37	56.16	2015-023-03-47-27	-17.03	168.52	97	117	220	SKSac	5-20s	0.99	-35	14	0.92	0.19	19.51	2.64	good
AE.MSF	25.37	56.16	2015-028-02-43-19	-20.97	-178.3	97	130	484	PKSbc	5-20s	0.99	-21	13	0.92	0.26	16.59	2.92	good
AE.MSF	25.37	56.16	2015-077-18-27-29	-36.12	-73.52	244	136	13	PKSbc	5-20s	0.99	-68	27	0.35	0.42	8.55	6.21	fair
AE.MSF	25.37	56.16	2015-082-04-51-38	-18.35	-69.17	266	129	130	SKKSac	5-20s	0.99	-47	26	0.69	0.4	14.19	3.64	good
AE.MSF	25.37	56.16	2015-097-00-46-21	-15.17	-173.23	87	133	30	PKSbc	5-20s	0.97	-18	7	1.48	0.48	21.46	3.28	fair
AE.MSF	25.37	56.16	2015-107-15-52-51	-15.88	-178.6	91	128	10	PKSdf	5-20s	0.92	-11	29	1.48	1.18	9.38	2.9	fair
AE.MSF	25.37	56.16	2015-112-22-57-15	-12.04	166.43	93	113	72	SKSac	5-20s	0.97	-28	23	1.06	0.54	8.29	2.48	fair
AE.MSF	25.37	56.16	2015-114-13-56-15	51.62	-130.77	4	103	8	SKSac	5-20s	Null	Null	Null	Null	Null	14.48	10.97	goodNull
AE.MSF	25.37	56.16	2015-120-10-45-02	-5.38	151.77	92	97	31	SKSac	5-20s	1	-22	40	0.88	0.88	15.03	3.95	fair
AE.MSF	25.37	56.16	2015-121-08-06-03	-5.2	151.78	92	97	44	SKKSac	5-20s	0.97	-37	27	0.66	0.53	5.39	3.91	fair
AE.MSF	25.37	56.16	2015-121-08-06-03	-5.2	151.78	92	97	44	SKSac	5-20s	0.99	-56	45	0.73	1.18	12.84	4.24	fair
AE.MSF	25.37	56.16	2015-125-01-44-06	-5.46	151.88	92	97	55	SKKSac	5-20s	0.97	-18	26	1.41	1	11.51	2.88	fair
AE.MSF	25.37	56.16	2015-127-07-10-19	-7.22	154.56	93	101	10	SKSac	5-20s	0.95	-12	64	1.31	2.05	8.83	3.62	fair
AE.MSF	25.37	56.16	2015-171-02-10-07	-36.36	-73.81	243	136	11	SKSac	5-20s	Null	Null	Null	Null	Null	8.67	3.4	goodNull
AE.MSF	25.37	56.16	2015-222-04-12-15	-9.34	158.05	94	105	22	SKSac	5-20s	0.99	-45	22	0.96	0.41	14.69	2.86	fair
AE.MSF	25.37	56.16	2015-224-18-49-24	-9.33	157.88	94	104	6	SKSac	5-20s	0.99	-39	34	0.72	0.66	11.81	3.44	fair
AE.MSF	25.37	56.16	2015-227-07-47-06	-10.9	163.82	93	110	8	SKSac	5-20s	0.99	-60	20	1.02	0.49	30.69	4.96	fair
AE.MSF	25.37	56.16	2015-260-03-55-15	-31.42	-71.69	250	134	27	PKSbc	5-20s	0.99	-55	29	0.55	0.71	11.48	4.59	fair
AE.MSF	25.37	56.16	2015-260-04-10-27	-31.52	-71.8	250	134	23	PKSbc	5-20s	0.99	-52	40	0.61	0.78	19.57	5.16	good
AE.MSF	25.37	56.16	2015-261-09-10-44	-32.37	-72.23	249	135	8	PKSbc	5-20s	1	-60	32	0.4	0.79	11.75	6.9	fair
AE.MSF	25.37	56.16	2015-261-09-10-44	-32.37	-72.23	249	135	8	SKKSac	5-20s	Null	Null	Null	Null	Null	15.9	5.81	goodNull
AE.MSF	25.37	56.16	2015-261-09-10-44	-32.37	-72.23	249	135	8	SKSac	5-20s	0.96	-49	44	0.96	1.1	6.45	2.78	fair
AE.MSF	25.37	56.16	2015-262-12-52-20	-32.33	-72.06	249	134	18	PKSbc	5-20s	0.97	-36	43	1.3	1.03	19.55	5.23	fair
AE.MSF	25.37	56.16	2015-262-12-52-20	-32.33	-72.06	249	134	18	SKKSac	5-20s	0.97	-58	51	0.49	2.11	11.36	5.51	fair
AE.MSF	25.37	56.16	2015-269-02-51-18	-30.82	-71.32	251	134	46	PKSbc	5-20s	0.97	-38	60	0.89	1.45	7.79	3.77	fair
AE.MSF	25.37	56.16	2015-293-21-52-02	-14.86	167.3	95	115	135	SKKSac	5-20s	0.99	-10	30	1.07	0.9	13.49	4.39	fair
AE.MSF	25.37	56.16	2015-293-21-52-02	-14.86	167.3	95	115	135	SKSac	5-20s	1	-16	8	1.23	0.37	26.44	3.18	fair
AE.MSF	25.37	56.16	2015-311-07-04-31	-29.46	-72.3	253	134	13	SKKSac	5-20s	0.98	-54	41	0.83	1.37	5	3.05	fair
AE.MSF	25.37	56.16	2015-311-07-31-43	-30.88	-71.45	251	134	46	PKSbc	5-20s	0.98	-49	48	0.79	1.3	9.9	3.67	fair
AE.MSF	25.37	56.16	2015-315-01-54-38	-29.51	-72.01	253	134	10	PKSbc	5-20s	0.97	-43	18	0.96	0.43	19.26	3.48	fair
AE.MSF	25.37	56.16	2015-315-01-54-38	-29.51	-72.01	253	134	10	SKKSac	5-20s	0.95	-47	51	0.94	1.97	9.16	3.67	fair
AE.MSF	25.37	56.16	2015-322-18-31-04	-8.9	158.42	93	105	13	SKSac	5-20s	0.94	-26	39	0.92	0.98	18.54	4.12	fair
AE.MSF	25.37	56.16	2015-331-21-00-22	-24.83	-70.6	259	132	34	PKSbc	5-20s	0.98	-37	55	0.61	1.21	11.46	4.66	fair
AE.MSF	25.37	56.16	2016-032-19-00-46	-30.75	-179.95	110	131	391	PKSbc	5-20s	0.97	-37	25	0.89	0.52	8.38	2.66	fair
AE.MSF	25.37	56.16	2016-039-16-19-12	-6.62	154.74	92	101	29	SKSac	5-20s	0.98	-28	30	0.96	0.62	11.47	2.93	fair
AE.MSF	25.37	56.16	2016-041-00-33-05	-30.57	-71.58	251	134	29	PKSbc	5-20s	0.94	-31	66	1.32	1.56	8.05	4.04	fair
AE.MSF	25.37	56.16	2016-098-03-32-53	-13.98	166.59	95	114	27	SKKSac	5-20s	0.98	-20	41	1.52	1.75	9.21	3.35	fair
AE.MSF	25.37	56.16	2016-110-05-25-39	-55.73	-27.23	216	107	14	SKSac	5-20s	Null	Null	Null	Null	Null	26.47	12.06	goodNull
AE.MSF	25.37	56.16	2016-120-01-33-38	10.27	-103.74	329	140	10	PKSdf	5-20s	0.95	-58	30	0.89	0.85	4.68	2.71	fair
AE.MSF	25.37	56.16	2016-148-04-08-43	-20.81	-178.65	97	130	567	PKSbc	5-20s	0.99	-28	18	0.99	0.32	15.94	2.72	good
AE.MSF	25.37	56.16	2016-149-05-38-50	-21.97	-178.2	98	130	405	PKSbc	5-20s	0.99	-19	7	1.17	0.23	19.35	2.07	good
AE.MSF	25.37	56.16	2016-166-13-49-22	-18.76	168.83	99	118	111	SKSac	5-20s	0.98	-23	24	0.99	0.5	11.22	2.86	fair
AE.MSF	25.37	56.16	2016-207-19-38-45	-2.97	148.04	92	93	14	SKSac	5-20s	0.96	-24	63	0.98	2.44	7.8	3.79	fair
AE.MSF	25.37	56.16	2016-217-14-15-12	-22.33	-66.01	260	127	270	SKSac	5-20s	0.96	-46	37	0.79	0.76	10.69	3.54	fair
AE.MSF	25.37	56.16	2016-244-03-11-34	-3.68	152.79	90	98	476	SKSac	5-20s	0.98	-19	33	1.12	0.89	13.06	3.93	fair
AE.MSF	25.37	56.16	2016-268-21-07-15	-18.17	-174.98	92	132	202	PKSbc	5-20s	0.97	-21	17	1.05	0.45	15.88	3.63	fair
AE.MSF	25.37	56.16	2016-268-21-28-41	-19.78	-178.24	95	130	596	PKSbc	5-20s	0.98	-7	8	1.4	0.59	12.52	3.25	fair
AE.MSF	25.37	56.16	2016-268-21-28-41	-19.78	-178.24	95	130	596	SKSac	5-20s	0.98	-27	33	0.73	0.59	10.09	3.22	fair
AE.MSF	25.37	56.16	2016-291-06-14-58	-6	148.89	94	95	42	SKSac	5-20s	0.98	-45	38	0.75	1.35	6.16	3.44	fair
AE.MSF	25.37	56.16	2016-309-16-20-44	-35.09	-71.05	245	134	90	SKKSac	5-20s	Null	Null	Null	Null	Null	3.87	3.34	fairNull
AE.MSF	25.37	56.16	2016-309-16-20-44	-35.09	-71.05	245	134	90	SKSdf	5-20s	Null	Null	Null	Null	Null	5.1	5.11	goodNull
AE.MSF	25.37	56.16	2016-325-20-57-44	-31.63	-68.64	249	132	108	PKSbc	5-20s	0.99	-32	32	0.99	0.87	15.95	5.83	fair
AE.MZR	23	53.48	2015-315-01-54-38	-29.51	-72.01	250	131	10	PKSbc	5-20s	0.97	10	8	1.07	0.17	22.39	2.19	fair
AE.MZR	23	53.48	2016-039-16-19-12	-6.62	154.74	92	103	29	SKSac	5-20s	Null	Null	Null	Null	Null	7.84	5.99	goodNull
AE.MZR	23	53.48	2016-094-08-23-52	-14.32	166.85	95	117	26	SKSac	5-20s	Null	Null	Null	Null	Null	19.81	7.76	goodNull
AE.MZR	23	53.48	2016-105-21-50-27	-14.53	166.43	95	116	16	SKKSac	5-20s	Null	Null	Null	Null	Null	16.23	8.04	goodNull
AE.MZR	23	53.48	2016-105-21-50-27	-14.53	166.43	95	116	16	SKSac	5-20s	Null	Null	Null	Null	Null	10.36	7.52	goodNull
AE.MZR	23	53.48	2016-110-05-25-39	-55.73	-27.23	215	104	14	SKSac	5-20s	Null	Null	Null	Null	Null	32.15	8.57	goodNull
AE.MZR	23	53.48	2016-120-01-33-38	10.27	-103.74	324	140	10	PKSdf	5-20s	0.98	31	21	1.68	0.9	8.71	1.96	fair
AE.MZR	23	53.48	2016-149-09-46-59	-56.24	-26.93	215	104	78	SKSac	5-20s	Null	Null	Null	Null	Null	4.58	4.37	fairNull
AE.MZR	23	53.48	2016-166-13-49-22	-18.76	168.83	99	120	111	SKSac	5-20s	Null	Null	Null	Null	Null	16.34	7.75	fairNull
AE.MZR	23	53.48	2016-207-19-38-45	-2.97	148.04	91	95	14	SKSac	5-20s	Null	Null	Null	Null	Null	7.98	5.91	goodNull
AE.MZR	23	53.48	2016-232-07-32-22	-55.28	-31.88	216	106	10	SKSac	5-20s	Null	Null	Null	Null	Null	12.08	4.47	goodNull
AE.MZR	23	53.48	2016-244-03-11-34	-3.68	152.79	90	100	476	SKSac	5-20s	0.98	13	61	1.02	1.56	11.5	5.7	fair
AE.MZR	23	53.48	2016-268-21-28-41	-19.78	-178.24	96	132	596	SKKSac	5-20s	0.98	46	18	1.19	0.39	8.66	1.69	fair
AE.MZR	23	53.48	2016-291-06-14-58	-6	148.89	93	97	42	SKSac	5-20s	Null	Null	Null	Null	Null	52.31	22.11	goodNull
AE.MZR	23	53.48	2016-360-14-22-27	-43.4	-73.94	232	132	38	PKSbc	5-20s	0.98	21	8	0.96	0.1	60.09	2.82	fair
AE.SHM	26.05	56.14	2014-180-15-52-23	-14.78	-175.26	87	131	9	PKSbc	5-20s	0.95	24	36	0.95	0.96	8.4	3.07	fair
AE.SHM	26.05	56.14	2014-188-11-23-54	14.72	-92.46	319	129	53	SKSac	5-20s	0.95	8	20	0.28	0.32	5.29	4.62	fair
AE.SHM	26.05	56.14	2014-200-12-27-10	-15.82	-174.45	88	132	227	PKSbc	5-20s	0.92	22	21	1.16	0.74	8.23	2.18	fair
AE.SHM	26.05	56.14	2014-202-14-54-41	-19.8	-178.4	95	130	615	SKKSac	5-20s	0.98	28	19	1.51	0.87	13.42	2.87	fair
AE.SHM	26.05	56.14	2014-202-14-54-41	-19.8	-178.4	95	130	615	SKSac	5-20s	0.96	55	35	0.62	1.13	5.11	3.4	fair
AE.SHM	26.05	56.14	2014-210-10-46-14	17.68	-95.65	325	129	107	SKKSac	5-20s	0.98	24	10	1.58	0.3	22.41	2.25	good
AE.SHM	26.05	56.14	2014-215-00-22-03	0.83	146.17	89	90	13	SKKSac	5-20s	0.93	33	37	0.77	1.17	7.5	3.56	fair
AE.SHM	26.05	56.14	2014-236-23-21-45	-14.6	-73.57	273	132	101	PKSbc	5-20s	0.91	40	21	1.31	0.64	6.37	1.78	fair
AE.SHM	26.05	56.14	2014-236-23-21-45	-14.6	-73.57	273	132	101	SKKSac	5-20s	1	42	31	1.05	0.54	3.99	2.46	fair
AE.SHM	26.05	56.14	2014-267-11-16-15	-23.8	-66.63	259	128	224	SKKSac	5-20s	0.97	34	17	0.88	0.2	12.84	2.64	good
AE.SHM	26.05	56.14	2014-268-17-51-17	61.94	-151.82	13	89	109	SKSac	5-20s	0.97	68	23	0.56	0.41	5.46	3.42	fair
AE.SHM	26.05	56.14	2014-305-18-57-22	-19.69	-177.76	94	130	434	SKKSac	5-20s	0.99	40	33	0.69	0.71	20.67	5.05	fair
AE.SHM	26.05	56.14	2014-305-18-57-22	-19.69	-177.76	94	130	434	SKSac	5-20s	0.94	60	55	0.62	2.1	10.49	4.6	fair
AE.SHM	26.05	56.14	2014-320-22-33-20	-37.65	179.66	118	131	22	SKKSac	5-20s	Null	Null	Null	Null	Null	24.79	10.41	goodNull
AE.SHM	26.05	56.14	2015-047-22-00-53	-55.52	-28.26	217	108	13	SKSac	5-20s	Null	Null	Null	Null	Null	16.81	9.02	goodNull
AE.SHM	26.05	56.14	2015-053-14-23-12	18.68	-106.85	338	133	5	PKSbc	5-20s	0.95	31	25	0.92	0.46	6.67	1.99	fair
AE.SHM	26.05	56.14	2015-069-20-55-44	6.78	-72.99	296	121	155	SKSac	5-20s	0.96	-82	19	0.89	0.25	7.51	5	fair
AE.SHM	26.05	56.14	2015-112-22-57-15	-12.04	166.43	92	113	72	SKKSac	5-20s	Null	Null	Null	Null	Null	7.75	4.75	goodNull
AE.SHM	26.05	56.14	2015-112-22-57-15	-12.04	166.43	92	113	72	SKSac	5-20s	Null	Null	Null	Null	Null	14.93	9.29	goodNull
AE.SHM	26.05	56.14	2015-114-13-56-15	51.62	-130.77	4	102	8	SKSac	5-20s	0.99	48	26	0.59	0.32	24.75	6.16	fair
AE.SHM	26.05	56.14	2015-120-10-45-02	-5.38	151.77	92	97	31	SKSac	5-20s	Null	Null	Null	Null	Null	3.55	3.33	fairNull
AE.SHM	26.05	56.14	2015-120-10-45-02	-5.38	151.77	92	97	31	SKSac	5-20s	Null	Null	Null	Null	Null	5.77	5.52	goodNull
AE.SHM	26.05	56.14	2015-121-08-06-03	-5.2	151.78	92	97	44	SKKSac	5-20s	0.98	51	35	0.38	0.64	7.51	6.03	fair
AE.SHM	26.05	56.14	2015-121-08-06-03	-5.2	151.78	92	97	44	SKSac	5-20s	0.99	54	29	0.41	0.34	6.34	4.86	fair
AE.SHM	26.05	56.14	2015-127-07-10-19	-7.22	154.56	93	101	10	SKKSac	5-20s	Null	Null	Null	Null	Null	8.13	7.75	goodNull
AE.SHM	26.05	56.14	2015-127-07-10-19	-7.22	154.56	93	101	10	SKSac	5-20s	Null	Null	Null	Null	Null	6.99	5.91	goodNull
AE.SHM	26.05	56.14	2015-140-22-48-53	-10.88	164.17	92	111	11	SKSac	5-20s	Null	Null	Null	Null	Null	17.11	10.31	goodNull
AE.SHM	26.05	56.14	2015-208-04-49-46	52.38	-169.45	26	92	29	SKSac	5-20s	0.94	69	22	0.61	0.74	5.13	4.34	fair
AE.SHM	26.05	56.14	2015-222-04-12-15	-9.34	158.05	93	105	22	SKSac	5-20s	0.99	58	55	0.36	1.56	14.67	7.77	fair
AE.SHM	26.05	56.14	2015-224-18-49-24	-9.33	157.88	93	105	6	SKSac	5-20s	0.97	46	33	0.74	0.72	12.16	3.67	fair
AE.SHM	26.05	56.14	2015-227-07-47-06	-10.9	163.82	92	111	8	SKSac	5-20s	0.97	53	33	0.29	0.86	7.86	6.11	fair
AE.SHM	26.05	56.14	2015-260-04-10-27	-31.52	-71.8	250	134	23	SKKSac	5-20s	Null	Null	Null	Null	Null	6.29	3.63	goodNull
AE.SHM	26.05	56.14	2015-261-09-10-44	-32.37	-72.23	249	135	8	PKSbc	5-20s	0.96	21	25	0.43	0.46	7.6	4.79	fair
AE.SHM	26.05	56.14	2015-262-12-52-20	-32.33	-72.06	249	135	18	SKKSac	5-20s	0.93	25	27	1.28	0.76	4.8	1.97	fair
AE.SHM	26.05	56.14	2015-269-02-51-18	-30.82	-71.32	251	134	46	PKSbc	5-20s	0.99	52	20	1.1	0.61	13.28	3.46	fair
AE.SHM	26.05	56.14	2015-293-21-52-02	-14.86	167.3	95	115	135	SKSac	5-20s	0.95	66	33	0.93	0.67	15.81	3.46	fair
AE.SHM	26.05	56.14	2015-311-07-04-31	-29.46	-72.3	253	135	13	SKKSac	5-20s	0.97	45	45	0.87	1.07	12.17	3.78	fair
AE.SHM	26.05	56.14	2015-311-07-31-43	-30.88	-71.45	251	134	46	PKSbc	5-20s	0.97	48	20	1.14	0.6	18.03	3.17	fair
AE.SHM	26.05	56.14	2015-315-01-54-38	-29.51	-72.01	253	134	10	SKSac	5-20s	0.91	26	30	1.13	0.9	8.43	2.49	fair
AE.SHM	26.05	56.14	2015-322-18-31-04	-8.9	158.42	93	105	13	SKSac	5-20s	Null	Null	Null	Null	Null	8.01	5.93	goodNull
AE.SHM	26.05	56.14	2015-331-21-00-22	-24.83	-70.6	259	132	34	PKSbc	5-20s	0.99	35	15	0.83	0.14	24.66	2.89	fair
AE.SHM	26.05	56.14	2016-039-16-19-12	-6.62	154.74	92	101	29	SKSac	5-20s	0.98	52	17	0.35	0.18	7.09	5.6	fair
AE.SHM	26.05	56.14	2016-041-00-33-05	-30.57	-71.58	252	134	29	PKSbc	5-20s	0.98	60	9	1.85	0.82	12.05	3.6	fair
AE.SHM	26.05	56.14	2016-094-08-23-52	-14.32	166.85	95	115	26	SKKSac	5-20s	0.97	73	24	1.19	0.78	19.57	4.13	fair
AE.SHM	26.05	56.14	2016-094-08-23-52	-14.32	166.85	95	115	26	SKSac	5-20s	Null	Null	Null	Null	Null	60.87	7.38	goodNull
AE.SHM	26.05	56.14	2016-097-06-58-48	-14.07	166.62	94	114	24	SKKSac	5-20s	Null	Null	Null	Null	Null	20.71	4.63	goodNull
AE.SHM	26.05	56.14	2016-098-03-32-53	-13.98	166.59	94	114	27	SKKSac	5-20s	0.96	33	31	0.59	0.67	3.48	2.92	fair
AE.SHM	26.05	56.14	2016-110-05-25-39	-55.73	-27.23	216	108	14	SKSac	5-20s	Null	Null	Null	Null	Null	14.9	6.46	goodNull
AE.SHM	26.05	56.14	2016-148-04-08-43	-20.81	-178.65	96	130	567	PKSbc	5-20s	0.97	59	20	0.44	0.3	5.82	4.45	fair
AE.SHM	26.05	56.14	2016-149-05-38-50	-21.97	-178.2	97	130	405	PKSbc	5-20s	0.98	63	30	0.64	0.4	20.65	3.98	good
AE.SHM	26.05	56.14	2016-149-09-46-59	-56.24	-26.93	216	108	78	SKSac	5-20s	Null	Null	Null	Null	Null	14.58	8.37	goodNull
AE.SHM	26.05	56.14	2016-166-13-49-22	-18.76	168.83	98	118	111	SKKSac	5-20s	0.98	49	34	0.87	1.14	9.81	3.97	fair
AE.SHM	26.05	56.14	2016-166-13-49-22	-18.76	168.83	98	118	111	SKSac	5-20s	0.98	23	62	1.07	2.3	10.5	5.2	fair
AE.SHM	26.05	56.14	2016-171-09-47-23	-20.28	169.07	100	119	13	SKSac	5-20s	Null	Null	Null	Null	Null	9.71	6.94	goodNull
AE.SHM	26.05	56.14	2016-207-19-38-45	-2.97	148.04	92	93	14	SKSac	5-20s	Null	Null	Null	Null	Null	5.25	6.78	goodNull
AE.SHM	26.05	56.14	2016-268-21-07-15	-18.17	-174.98	91	132	202	SKKSac	5-20s	Null	Null	Null	Null	Null	6.39	2.19	fairNull
AE.SHM	26.05	56.14	2016-291-06-14-58	-6	148.89	94	95	42	SKSac	5-20s	Null	Null	Null	Null	Null	7.16	6.3	goodNull
AE.SHM	26.05	56.14	2016-309-16-20-44	-35.09	-71.05	245	134	90	SKKSac	5-20s	0.99	49	50	0.96	0.99	16.43	5.07	fair
AE.SHM	26.05	56.14	2016-329-18-43-47	11.91	-88.9	314	129	10	SKKSac	5-20s	0.92	23	23	1.81	1.48	6.69	2.6	fair
AE.SRB	25.22	54.23	2015-023-03-47-27	-17.03	168.52	96	119	220	SKKSac	5-20s	0.98	63	7	1.68	0.56	16.55	2.37	good
AE.SRB	25.22	54.23	2015-023-03-47-27	-17.03	168.52	96	119	220	SKSac	5-20s	0.99	79	5	1.81	0.23	33.43	2.99	fair
AE.SRB	25.22	54.23	2015-028-02-43-19	-20.97	-178.3	96	132	484	PKSbc	5-20s	0.98	83	9	1.9	0.82	12.96	3.05	fair
AE.SRB	25.22	54.23	2015-047-22-00-53	-55.52	-28.26	216	106	13	SKSac	5-20s	0.96	-77	30	0.8	0.58	27.18	5.32	fair
AE.SRB	25.22	54.23	2015-047-22-00-53	-55.52	-28.26	216	106	13	SKSdf	5-20s	0.98	-84	31	1.38	1.05	7.72	2.4	fair
AE.SRB	25.22	54.23	2015-069-20-55-44	6.78	-72.99	295	120	155	SKSac	5-20s	0.96	72	19	1.06	0.25	18.13	2.75	fair
AE.SRB	25.22	54.23	2015-082-04-51-38	-18.35	-69.17	266	127	130	SKKSac	5-20s	0.97	63	15	2.34	0.93	6.78	1.6	fair
AE.SRB	25.22	54.23	2015-082-04-51-38	-18.35	-69.17	266	127	130	SKSac	5-20s	0.97	48	11	1.46	0.28	11.91	1.47	good
AE.SRB	25.22	54.23	2015-114-13-56-15	51.62	-130.77	3	103	8	SKSac	5-20s	0.99	78	59	1.64	2.37	8.18	3.76	fair
AE.SRB	25.22	54.23	2015-127-07-10-19	-7.22	154.56	92	102	10	SKSac	5-20s	0.97	61	15	0.89	0.23	43.22	3.92	fair
AE.SRB	25.22	54.23	2015-140-22-48-53	-10.88	164.17	92	113	11	SKSac	5-20s	0.96	72	27	1.62	1.11	11.94	3.31	fair
AE.SRB	25.22	54.23	2015-222-04-12-15	-9.34	158.05	93	106	22	SKKSac	5-20s	0.97	68	48	1.34	0.89	8.62	2.21	good
AE.SRB	25.22	54.23	2015-222-04-12-15	-9.34	158.05	93	106	22	SKSac	5-20s	0.97	71	8	2.05	0.63	14.57	2.01	good
AE.SRB	25.22	54.23	2015-224-18-49-24	-9.33	157.88	93	106	6	SKSac	5-20s	0.96	77	10	1.79	0.5	13.15	2.92	good
AE.SRB	25.22	54.23	2015-227-07-47-06	-10.9	163.82	92	112	8	SKSac	5-20s	0.97	75	52	1.55	2.19	9.65	3.85	fair
AE.SRB	25.22	54.23	2015-250-09-13-56	-32.82	-177.86	112	134	17	SKSac	5-20s	0.94	53	25	1.02	0.65	7.82	2.17	fair
AE.SRB	25.22	54.23	2015-260-03-55-15	-31.42	-71.69	250	132	27	PKSbc	5-20s	0.97	52	7	2.28	0.41	19.24	2.13	good
AE.SRB	25.22	54.23	2015-261-09-10-44	-32.37	-72.23	248	133	8	PKSbc	5-20s	0.96	52	9	2.14	0.54	17.41	2.89	good
AE.SRB	25.22	54.23	2015-269-02-51-18	-30.82	-71.32	250	132	46	PKSbc	5-20s	0.98	50	7	2.36	0.39	12.23	1.61	good
AE.SRB	25.22	54.23	2015-311-07-04-31	-29.46	-72.3	252	133	13	SKSac	5-20s	0.95	57	6	2.48	0.44	15.43	2.87	fair
AE.SRB	25.22	54.23	2015-311-07-31-43	-30.88	-71.45	250	132	46	PKSbc	5-20s	0.97	52	5	2.57	0.28	26.26	1.92	good
AE.SRB	25.22	54.23	2015-311-07-31-43	-30.88	-71.45	250	132	46	SKKSac	5-20s	0.96	50	8	2.69	0.55	10.83	1.64	fair
AE.SRB	25.22	54.23	2015-313-16-03-46	51.64	-173.07	27	93	10	SKSac	5-30s	0.97	88	16	0.78	0.67	19.1	5.59	fair
AE.SRB	25.22	54.23	2015-315-01-54-38	-29.51	-72.01	252	132	10	PKSbc	5-20s	0.98	50	7	2.24	0.33	14.65	1.8	good
AE.SRB	25.22	54.23	2015-322-18-31-04	-8.9	158.42	92	107	13	SKSac	5-20s	Null	Null	Null	Null	Null	13.71	5.7	goodNull
AE.SRB	25.22	54.23	2015-331-21-00-22	-24.83	-70.6	258	130	34	PKSbc	5-20s	0.98	52	8	2.21	0.39	13.16	1.37	good
AE.SRB	25.22	54.23	2016-041-00-33-05	-30.57	-71.58	251	132	29	PKSbc	5-20s	0.97	51	8	2.38	0.46	11.95	1.64	good
AE.SRB	25.22	54.23	2016-097-06-58-48	-14.07	166.62	94	116	24	SKSac	5-20s	0.98	50	38	0.47	0.56	10.15	4.17	fair
AE.SRB	25.22	54.23	2016-110-05-25-39	-55.73	-27.23	216	106	14	SKSac	5-20s	0.99	50	14	1.58	0.85	16.4	4.02	fair
AE.SRB	25.22	54.23	2016-148-04-08-43	-20.81	-178.65	96	131	567	PKSbc	5-20s	0.97	74	18	0.77	2.14	7.05	4.21	fair
AE.SRB	25.22	54.23	2016-149-05-38-50	-21.97	-178.2	98	132	405	PKSbc	5-20s	0.99	74	22	0.92	0.43	15.62	3.29	fair
AE.SRB	25.22	54.23	2016-149-09-46-59	-56.24	-26.93	215	106	78	SKSac	5-20s	0.98	55	33	1.05	0.82	16.17	3.96	fair
AE.SRB	25.22	54.23	2016-166-13-49-22	-18.76	168.83	98	120	111	SKKSac	5-20s	0.97	61	32	0.87	0.55	7.96	2.36	fair
AE.SRB	25.22	54.23	2016-171-09-47-23	-20.28	169.07	100	120	13	SKSac	5-20s	0.93	45	26	1.14	0.85	7.42	2.61	fair
AE.SRB	25.22	54.23	2016-195-12-11-12	-28	-176.44	105	135	12	PKSbc	5-20s	0.99	68	32	0.66	0.47	27.49	4.97	fair
AE.SRB	25.22	54.23	2016-232-07-32-22	-55.28	-31.88	217	108	10	SKSac	5-20s	0.97	55	59	1.53	2.48	11.19	4.48	fair
AE.SRB	25.22	54.23	2016-244-03-11-34	-3.68	152.79	90	99	476	SKSac	5-20s	0.99	54	32	0.81	0.49	12.04	3.23	fair
AE.SRB	25.22	54.23	2016-268-21-28-41	-19.78	-178.24	95	131	596	PKSbc	5-20s	0.96	70	15	1.24	0.42	9.08	2.2	fair
AE.SRB	25.22	54.23	2016-309-16-20-44	-35.09	-71.05	245	132	90	SKKSac	5-20s	0.92	55	11	2.31	1.05	9.67	3.32	fair
AE.SRB	25.22	54.23	2016-329-18-43-47	11.91	-88.9	311	128	10	SKKSac	5-20s	0.98	51	11	2.66	1.83	7.85	3.43	fair
AE.SRB	25.22	54.23	2016-336-22-40-26	-15.31	-70.83	270	128	12	SKSac	5-20s	0.93	45	24	1.22	0.47	5.07	2.02	fair
BH.SAK	25.98	50.54	2015-114-13-56-15	51.62	-130.77	1	103	8	SKSac	5-20s	Null	Null	Null	Null	Null	6.78	4.37	fairNull
BH.SAK	25.98	50.54	2015-127-07-10-19	-7.22	154.56	90	106	10	SKSac	5-20s	0.99	-11	25	1.46	1.06	11.82	5.13	fair
BH.SAK	25.98	50.54	2015-140-22-48-53	-10.88	164.17	90	116	11	SKSac	5-20s	0.97	-40	34	0.35	0.64	6.99	4.85	fair
BH.SAK	25.98	50.54	2015-208-04-49-46	52.38	-169.45	23	95	29	SKKSac	5-20s	0.94	-22	23	0.87	0.71	6.37	2.93	fair
BH.SAK	25.98	50.54	2015-208-04-49-46	52.38	-169.45	23	95	29	SKSac	5-20s	0.98	-30	18	0.83	0.32	19.48	4.47	fair
BH.SAK	25.98	50.54	2015-210-02-35-59	59.89	-153.2	12	92	119	SKSac	5-20s	0.99	-18	26	0.78	0.29	13.82	2.49	good
BH.SAK	25.98	50.54	2015-224-18-49-24	-9.33	157.88	91	110	6	SKSac	5-20s	0.96	-43	23	0.49	0.35	8.81	4.58	fair
BH.SAK	25.98	50.54	2016-039-16-19-12	-6.62	154.74	90	106	29	SKSac	5-20s	0.98	-11	8	1.43	0.56	19.05	4.57	fair
BH.SAK	25.98	50.54	2016-072-18-06-44	51.56	-173.94	26	93	19	SKSac	5-20s	0.97	-25	9	0.81	0.14	19.65	2.2	good
BH.SAK	25.98	50.54	2016-094-08-23-52	-14.32	166.85	92	120	26	SKSac	5-20s	Null	Null	Null	Null	Null	9.02	5.52	goodNull
BH.SAK	25.98	50.54	2016-097-06-58-48	-14.07	166.62	92	119	24	SKSac	5-20s	Null	Null	Null	Null	Null	8.1	5.96	goodNull
BH.SAK	25.98	50.54	2016-098-03-32-53	-13.98	166.59	92	119	27	SKSac	5-20s	Null	Null	Null	Null	Null	5.85	5.66	goodNull
BH.SAK	25.98	50.54	2016-110-05-25-39	-55.73	-27.23	215	105	14	SKKSac	5-20s	0.93	-26	49	0.97	1.64	6.77	3.37	fair
BH.SAK	25.98	50.54	2016-110-05-25-39	-55.73	-27.23	215	105	14	SKSac	5-20s	0.98	-29	25	0.88	0.6	16.58	3.69	fair
BH.SAK	25.98	50.54	2016-111-08-33-47	0.64	-80.21	291	126	14	SKKSac	5-20s	0.97	-24	27	0.79	0.45	8.82	2.92	fair
BH.SAK	25.98	50.54	2016-120-01-33-38	10.27	-103.74	322	136	10	PKSbc	5-20s	0.98	-19	10	1.45	0.6	7.37	2.71	fair
BH.SAK	25.98	50.54	2016-120-01-33-38	10.27	-103.74	322	136	10	SKKSac	5-20s	0.97	-22	15	2.13	1.48	9.29	2.87	fair
BH.SAK	25.98	50.54	2016-139-07-57-02	0.43	-79.79	291	125	16	SKKSac	5-20s	0.97	-34	13	1.33	0.39	7.23	1.53	fair
BH.SAK	25.98	50.54	2016-149-05-38-50	-21.97	-178.2	96	135	405	PKSbc	5-20s	0.98	-13	55	0.53	0.75	12.84	5.37	fair
BH.SAK	25.98	50.54	2016-149-09-46-59	-56.24	-26.93	214	105	78	SKKSac	5-20s	0.96	-27	25	1.2	0.8	10.25	3.52	fair
BH.SAK	25.98	50.54	2016-149-09-46-59	-56.24	-26.93	214	105	78	SKSac	5-20s	0.98	-37	37	1.02	1.11	7.61	3.84	fair
BH.SAK	25.98	50.54	2016-166-13-49-22	-18.76	168.83	96	123	111	SKKSac	5-20s	Null	Null	Null	Null	Null	10.39	4.76	goodNull
BH.SAK	25.98	50.54	2016-171-09-47-23	-20.28	169.07	98	124	13	SKKSac	5-20s	Null	Null	Null	Null	Null	22.61	10.01	goodNull
BH.SAK	25.98	50.54	2016-329-18-43-47	11.91	-88.9	309	125	10	SKKSac	5-20s	0.99	-33	13	1.76	0.98	8.39	2.58	fair
BH.SAK	25.98	50.54	2016-329-18-43-47	11.91	-88.9	309	125	10	SKSac	5-20s	0.99	-31	10	1.79	0.66	12.46	2.34	fair
BH.SAK	25.98	50.54	2016-360-14-22-27	-43.4	-73.94	234	132	38	PKSbc	5-20s	0.99	-16	18	0.99	0.6	14.33	3.52	fair
BI.AHRM	28.87	51.3	2010-181-04-31-02	-23.31	179.12	96	133	581	PKSbc	5-20s	0.96	46	25	0.9	0.55	9.77	2.9	fair
BI.AHRM	28.87	51.3	2010-193-00-11-21	-22.15	-68.22	262	126	115	SKSac	5-20s	Null	Null	Null	Null	Null	10.09	6.86	goodNull
BI.AHRM	28.87	51.3	2010-199-13-04-09	-5.97	150.43	91	101	28	SKSac	5-20s	0.96	19	66	0.78	2.68	7.25	4.83	fair
BI.AHRM	28.87	51.3	2010-246-16-35-47	-43.52	171.83	124	131	12	PKSbc	4-25s	0.91	55	8	0.92	0.31	-1.21	0	fair
BI.AHRM	28.87	51.3	2010-247-08-52-04	-17.37	-174	85	137	69	SKKSac	5-20s	0.98	30	31	0.8	0.61	10.4	3.04	fair
BI.AHRM	28.87	51.3	2010-250-16-13-32	-15.88	-179.31	86	132	9	PKSbc	4-25s	0.95	69	7	1.44	0.56	-1.21	0	fair
BI.AHRM	28.87	51.3	2010-252-07-28-01	-37.03	-73.41	245	133	16	PKSbc	4-25s	Null	Null	Null	Null	Null	-1.21	0	fairNull
BI.AHRM	28.87	51.3	2010-252-07-28-01	-37.03	-73.41	245	133	16	SKSac	5-20s	0.95	-45	39	1.3	1.09	8.6	3.57	fair
BI.AHRM	28.87	51.3	2010-363-06-54-19	-19.66	168.14	96	122	16	SKSac	5-20s	0.97	78	67	0.64	1.18	20.29	6.78	fair
BI.AHRM	28.87	51.3	2011-009-10-03-43	-19.16	168.31	95	122	22	SKSac	5-20s	0.96	71	33	0.9	0.44	14.63	5.16	fair
BI.AHRM	28.87	51.3	2011-113-04-16-54	-10.38	161.2	90	112	79	SKSdf	5-20s	0.9	36	22	1.22	0.72	4.03	2.38	fair
BI.AHRM	28.87	51.3	2011-171-16-36-01	-21.7	-68.23	263	125	128	SKKSac	5-20s	0.99	-48	35	0.63	0.47	6.78	4.25	fair
BI.AHRM	28.87	51.3	2011-171-16-36-01	-21.7	-68.23	263	125	128	SKSac	4-25s	Null	Null	Null	Null	Null	-1.21	0	fairNull
BI.AHRM	28.87	51.3	2011-236-17-46-11	-7.64	-74.53	281	125	147	SKKSac	4-25s	0.92	-4	16	0.82	0.67	-1.21	0	fair
BI.AHRM	28.87	51.3	2011-236-17-46-11	-7.64	-74.53	281	125	147	SKSac	4-25s	0.96	-33	35	0.31	0.41	-1.21	0	fair
BI.AHRM	28.87	51.3	2011-348-05-04-58	-7.55	146.81	94	98	135	SKSac	4-25s	0.92	61	29	0.62	0.41	-1.21	0	fair
BI.AHRM	28.87	51.3	2011-357-00-58-38	-43.49	172.8	124	132	10	PKSbc	4-25s	0.91	59	6	0.92	0.21	-1.21	0	good
BI.AHRM	28.87	51.3	2012-021-18-47-11	14.87	-93	317	124	45	SKKSac	5-20s	Null	Null	Null	Null	Null	11.62	6.18	goodNull
BI.AHRM	28.87	51.3	2012-021-18-47-11	14.87	-93	317	124	45	SKSac	5-20s	Null	Null	Null	Null	Null	14.09	6.82	goodNull
BI.AHRM	28.87	51.3	2012-081-22-15-06	-6.24	145.96	93	97	118	SKSac	4-25s	0.94	46	21	0.72	0.36	-1.21	0	fair
BI.AHRM	28.87	51.3	2012-108-03-50-15	-32.62	-71.36	250	131	29	PKSbc	5-20s	0.98	-67	21	0.3	0.24	12.42	7.19	good
BI.AHRM	28.87	51.3	2012-108-07-13-49	-5.46	147.12	92	98	198	SKSac	4-25s	0.94	45	25	0.62	0.31	-1.21	0	fair
BI.AHRM	28.87	51.3	2012-185-10-36-15	-40.02	173.76	119	132	230	PKSbc	4-25s	0.95	51	17	0.82	0.51	-1.21	0	fair
BI.AHRM	28.87	51.3	2012-188-02-28-22	-14.66	167.34	91	120	160	SKSac	5-20s	0.95	43	30	0.86	0.7	8.11	2.75	fair
BI.AHRM	28.87	51.3	2012-215-09-56-41	-4.65	153.28	88	103	46	SKSac	5-20s	0.96	54	20	0.38	0.24	4.02	3.26	fair
BI.AHRM	28.87	51.3	2012-324-09-44-34	-5.71	151.6	90	102	13	SKSac	4-25s	0.95	54	16	0.72	0.31	-1.21	0	fair
BI.AHRM	28.87	51.3	2013-005-08-58-19	55.39	-134.65	3	96	10	SKSac	5-20s	1	-71	29	1.46	1.21	16.95	5.32	fair
BI.AHRM	28.87	51.3	2013-038-00-30-10	-11.66	164.94	89	116	8	SKSac	5-20s	Null	Null	Null	Null	Null	15.34	7.54	goodNull
BI.AHRM	28.87	51.3	2013-069-22-51-50	-6.6	148.17	92	99	28	SKSac	4-25s	0.9	30	19	0.82	0.46	-1.21	0	fair
BI.AHRM	28.87	51.3	2013-106-22-55-26	-3.21	142.54	92	93	13	SKSac	4-25s	0.95	58	21	0.72	0.36	-1.21	0	fair
BI.AHRM	28.87	51.3	2013-131-20-46-57	-17.96	-175.11	86	136	212	PKSbc	5-20s	0.99	46	45	0.42	0.68	10.39	5.77	fair
BI.AHRM	28.87	51.3	2013-188-18-35-30	-3.92	153.93	87	103	385	SKKSac	5-20s	0.94	32	21	1.4	0.74	6.21	1.69	fair
BI.AHRM	28.87	51.3	2013-202-05-09-31	-41.7	174.34	122	133	17	PKSbc	4-25s	0.95	54	7	0.82	0.26	-1.21	0	fair
BI.AHRM	28.87	51.3	2013-224-09-49-32	-5.4	-81.93	289	130	10	PKSbc	4-25s	0.93	-5	22	0.51	0.46	-1.21	0	fair
BI.AHRM	28.87	51.3	2013-224-09-49-32	-5.4	-81.93	289	130	10	SKKSac	5-20s	0.98	-48	57	0.8	2.13	7.78	4.03	fair
BI.AHRM	28.87	51.3	2013-273-05-55-55	-30.93	-178.32	105	137	41	PKSbc	5-20s	0.96	36	16	1.62	0.84	9.02	2.57	fair
BI.AHRM	28.87	51.3	2013-306-18-53-46	-19.17	-172.64	86	139	10	PKSdf	5-20s	0.99	73	47	0.84	0.84	25.48	7.37	fair
BI.AHRM	28.87	51.3	2014-134-20-56-13	6.45	144.92	83	90	10	SKSac	4-25s	0.9	39	34	0.51	0.62	-1.21	0	fair
BI.AHRM	28.87	51.3	2014-135-08-16-34	6.43	144.94	83	90	11	SKSac	5-20s	0.99	41	40	0.52	0.76	14.45	5.9	good
BI.AHRM	28.87	51.3	2014-267-11-16-15	-23.8	-66.63	260	125	224	SKKSac	5-20s	0.99	-51	29	0.22	0.32	7.98	6.68	fair
BI.AHRM	28.87	51.3	2014-287-03-51-34	12.53	-88.12	311	123	40	SKSac	4-25s	0.91	-40	13	1.44	1.18	-1.21	0	fair
BI.AHRM	28.87	51.3	2014-305-18-57-22	-19.69	-177.76	90	135	434	SKKSac	5-20s	0.94	79	32	2	2.02	7.18	4.07	fair
BI.AHRM	28.87	51.3	2015-023-03-47-27	-17.03	168.52	93	122	219	SKSac	5-20s	Null	Null	Null	Null	Null	14.18	7.84	goodNull
BI.AHRM	28.87	51.3	2015-023-03-47-27	-17.03	168.52	93	122	220	SKKSac	4-25s	0.91	16	6	1.74	0.67	-1.21	0	fair
BI.AHRM	28.87	51.3	2015-114-13-56-15	51.61	-130.77	1	100	8	SKSac	5-20s	0.95	-36	50	0.76	1.66	8.96	4.75	fair
BI.AHRM	28.87	51.3	2015-140-22-48-53	-10.88	164.17	89	115	11	SKKSac	4-25s	Null	Null	Null	Null	Null	-1.21	0	fairNull
BI.AHRM	28.87	51.3	2015-224-18-49-24	-9.33	157.88	90	109	6	SKSac	5-20s	0.98	24	28	0.92	0.74	16.93	4.13	fair
BI.AHRM	28.87	51.3	2015-269-02-51-18	-30.81	-71.32	253	131	46	PKSbc	4-25s	Null	Null	Null	Null	Null	-1.21	0	fairNull
BI.AHRM	28.87	51.3	2015-293-21-52-02	-14.86	167.3	91	120	135	SKSac	4-25s	0.95	77	26	0.82	0.77	-1.21	0	fair
BI.AHRM	28.87	51.3	2015-311-07-04-31	-29.46	-72.3	255	131	13	SKKSac	5-20s	0.95	-29	63	1.66	2.3	7.66	3.81	fair
BI.AHRM	28.87	51.3	2016-097-06-58-48	-14.07	166.62	91	119	24	SKSac	5-20s	Null	Null	Null	Null	Null	6.98	4.85	fairNull
BI.AHRM	28.87	51.3	2016-110-05-25-39	-55.73	-27.23	215	107	14	SKSac	4-25s	Null	Null	Null	Null	Null	-1.21	0	fairNull
BI.AHRM	28.87	51.3	2016-111-08-33-47	0.64	-80.21	294	125	14	SKKSac	5-20s	0.98	10	10	1.56	1.84	9.2	3.64	fair
BI.AHRM	28.87	51.3	2016-120-01-33-38	10.28	-103.74	325	134	10	PKSbc	4-25s	0.92	-25	15	1.95	1.69	-1.21	0	fair
BI.AHRM	28.87	51.3	2016-158-02-35-32	-30.02	-177.84	104	137	43	PKSbc	5-20s	0.99	40	26	1.06	0.72	9.84	2.55	fair
BI.AHRM	28.87	51.3	2016-329-18-43-48	11.96	-88.84	311	124	10	SKSac	4-25s	0.95	-37	7	1.23	0.67	-1.21	0	fair
BI.ASAO	34.55	50.03	2004-180-09-49-47	54.8	-134.25	2	91	20	SKSac	4-25s	0.91	-71	10	1.33	0.72	-0.76	0	fair
BI.ASAO	34.55	50.03	2004-181-07-01-30	10.74	-87.04	310	119	9	SKSac	4-25s	Null	Null	Null	Null	Null	-0.76	0	fairNull
BI.ASAO	34.55	50.03	2004-197-04-27-14	-17.66	-178.76	82	134	565	PKSbc	5-20s	0.96	-52	43	0.68	3.13	9.28	5.52	fair
BI.ASAO	34.55	50.03	2004-241-13-41-25	-35.17	-70.53	251	132	5	SKSac	5-20s	0.98	8	49	0.7	0.6	9.09	4.48	fair
BI.ASAO	34.55	50.03	2004-250-12-42-59	-55.37	-28.98	217	112	10	SKKSac	4-25s	Null	Null	Null	Null	Null	-0.76	0	fairNull
BI.ASAO	34.55	50.03	2004-250-12-42-59	-55.37	-28.98	217	112	10	SKSac	4-25s	Null	Null	Null	Null	Null	-0.76	0	fairNull
BI.ASAO	34.55	50.03	2004-278-19-20-34	14.55	146.99	74	87	7	SKSac	4-25s	0.94	-40	9	1.33	0.51	-0.76	0	fair
BI.ASAO	34.55	50.03	2004-326-11-41-07	15.68	-61.71	295	98	14	SKSac	5-20s	0.96	42	62	0.8	1.85	11.63	5.56	fair
BI.ASAO	34.55	50.03	2005-038-20-02-17	-4.53	153.19	86	103	37	SKSac	4-25s	0.91	-22	25	1.13	1.18	-0.76	0	fair
BI.ASAO	34.55	50.03	2005-045-18-05-59	15.78	-61.74	295	98	12	SKSac	4-25s	0.95	37	13	1.44	1.08	-0.76	0	fair
BI.ASAO	34.55	50.03	2005-078-15-02-42	-20.41	-174.34	82	139	18	SKSac	5-20s	0.97	-50	10	1.7	0.36	9.61	1.25	fair
BI.ASAO	34.55	50.03	2005-078-17-34-46	-21.89	-179.55	87	135	598	SKKSac	5-20s	0.95	-60	50	0.74	1.66	7.58	4.04	fair
BI.ASAO	34.55	50.03	2005-080-12-23-54	-24.98	-63.47	260	122	579	SKSac	5-20s	0.94	6	12	1.7	0.48	5.51	2	good
BI.ASAO	34.55	50.03	2005-101-17-08-53	-21.98	170.61	93	127	68	SKSac	5-20s	Null	Null	Null	Null	Null	18.7	6.94	goodNull
BI.ASAO	34.55	50.03	2005-136-03-54-14	-32.59	-179.35	102	139	34	PKSdf	5-20s	0.99	-34	41	0.54	1.77	9.64	5.08	fair
BI.ASAO	34.55	50.03	2005-153-10-56-01	-24.22	-67	263	125	196	SKKSac	5-20s	0.98	6	51	1.22	1.11	12.02	5.35	fair
BI.ASAO	34.55	50.03	2005-163-19-26-24	-56.29	-27.07	216	111	94	SKKSac	4-25s	Null	Null	Null	Null	Null	-0.76	0	fairNull
BI.ASAO	34.55	50.03	2005-164-22-44-33	-19.99	-69.2	269	125	116	SKKSac	4-25s	Null	Null	Null	Null	Null	-0.76	0	fairNull
BI.ASAO	34.55	50.03	2005-166-02-50-54	41.29	-125.95	357	104	16	SKSac	5-20s	0.94	-42	37	0.92	0.61	7.73	2.83	fair
BI.ASAO	34.55	50.03	2005-166-10-13-59	-4.59	153.19	86	103	74	SKSac	5-20s	0.94	-62	23	0.9	0.48	7.95	2.65	fair
BI.ASAO	34.55	50.03	2005-191-04-46-31	-36.31	-97.26	257	153	10	SKKSac	4-25s	0.93	4	7	1.13	0.46	-0.76	0	good
BI.ASAO	34.55	50.03	2005-269-01-55-37	-5.68	-76.4	288	123	115	SKSac	5-20s	Null	Null	Null	Null	Null	11.41	4.7	goodNull
BI.ASAO	34.55	50.03	2005-273-23-15-19	-5.67	151.68	88	103	25	SKSac	4-25s	0.96	-61	32	0.72	0.72	-0.76	0	fair
BI.ASAO	34.55	50.03	2005-321-19-26-54	-22.36	-67.89	265	125	147	SKKSac	5-20s	0.98	53	28	0.14	0.36	3.95	3.85	fair
BI.ASAO	34.55	50.03	2006-049-15-59-22	-5.19	152.05	87	103	44	SKSac	4-25s	0.9	-74	23	1.03	0.87	-0.76	0	fair
BI.ASAO	34.55	50.03	2006-116-01-46-03	-57.48	147.57	141	122	10	SKKSac	5-20s	0.96	8	27	0.38	0.56	8.99	4.87	fair
BI.ASAO	34.55	50.03	2006-153-07-31-36	-20.84	-178.7	85	135	591	PKSbc	5-20s	0.96	38	31	0.98	0.7	5.85	2.18	fair
BI.ASAO	34.55	50.03	2006-197-11-42-41	-28.71	-72.54	260	131	10	PKSbc	4-25s	0.96	7	5	1.54	0.46	-0.76	0	fair
BI.ASAO	34.55	50.03	2006-237-00-44-46	-24.4	-67.03	263	125	184	SKKSac	5-20s	0.99	3	69	1.22	1.09	14.17	6.66	fair
BI.ASAO	34.55	50.03	2006-260-09-34-13	-31.73	-67.14	254	128	137	SKKSac	5-20s	0.96	15	40	1	1	6.76	2.78	fair
BI.ASAO	34.55	50.03	2006-281-13-50-24	-23.55	-175.27	87	139	10	PKSbc	4-25s	0.92	-14	9	1.44	0.92	-0.76	0	fair
BI.ASAO	34.55	50.03	2006-285-18-05-56	-31.26	-71.37	257	131	31	PKSbc	4-25s	0.9	8	15	0.51	0.31	-0.76	0	fair
BI.ASAO	34.55	50.03	2006-317-16-12-28	-6.38	151.23	89	103	11	SKSac	5-20s	0.97	-25	16	1.54	0.65	7.48	2.43	fair
BI.ASAO	34.55	50.03	2006-337-20-52-15	13.99	-91.21	316	119	61	SKSac	5-20s	0.98	-6	20	0.16	0.24	5.76	5.52	good
BI.ASAO	34.55	50.03	2007-031-03-15-52	-29.78	-178	97	139	34	PKSdf	5-20s	0.96	-75	80	1.82	1.83	7.56	4.98	fair
BI.ASAO	34.55	50.03	2007-077-02-11-05	4.58	-78.49	298	118	7	SKSac	5-20s	0.97	-47	33	1.24	0.97	11.49	4.11	fair
BI.ASAO	34.55	50.03	2007-094-06-34-35	-7.76	156.49	87	108	17	SKSac	5-20s	0.97	-72	64	0.88	1.45	11.15	5.62	fair
BI.ASAO	34.55	50.03	2007-196-09-27-34	-15.38	168.6	87	122	8	SKKSac	5-20s	0.94	-41	34	1.16	0.97	5.41	2.29	fair
BI.ASAO	34.55	50.03	2007-202-13-27-04	-8.13	-71.27	282	120	644	SKSac	5-20s	0.98	51	16	0.96	0.29	8.61	1.99	fair
BI.ASAO	34.55	50.03	2007-202-15-34-52	-22.15	-65.78	264	123	290	SKSac	4-25s	0.96	16	19	0.82	0.51	-0.76	0	good
BI.ASAO	34.55	50.03	2007-228-08-39-28	-9.83	159.47	87	111	15	SKKSac	5-20s	0.98	-71	61	0.88	2.43	10.02	5.07	fair
BI.ASAO	34.55	50.03	2007-253-01-49-11	2.97	-77.96	296	119	15	SKSac	5-20s	0.97	37	39	1.36	1.33	16.91	5.58	fair
BI.ASAO	34.55	50.03	2007-268-05-16-01	-30.96	180	100	138	416	PKSbc	5-20s	0.97	-68	72	1.88	1.82	6.22	3.72	fair
BI.ASAO	34.55	50.03	2007-271-01-01-49	-21.21	169.36	93	125	12	SKSac	5-20s	0.98	43	27	0.82	0.5	8.57	4.02	fair
BI.ASAO	34.55	50.03	2007-273-09-47-51	-49.14	164.11	128	130	18	PKSbc	4-25s	Null	Null	Null	Null	Null	-0.76	0	fairNull
BI.ASAO	34.55	50.03	2007-273-09-47-51	-49.14	164.11	128	130	18	SKKSac	4-25s	Null	Null	Null	Null	Null	-0.76	0	fairNull
BI.ASAO	34.55	50.03	2007-320-03-13-00	-2.31	-77.84	292	122	122	SKKSac	5-20s	Null	Null	Null	Null	Null	25.42	12.31	goodNull
BI.ASAO	34.55	50.03	2007-320-03-13-00	-2.31	-77.84	292	122	122	SKSac	5-20s	Null	Null	Null	Null	Null	14.69	9.1	goodNull
BI.ASAO	34.55	50.03	2007-331-11-49-58	-10.95	162.15	87	114	16	SKKSac	5-20s	0.93	-33	29	0.92	0.66	19.36	3.82	fair
BI.ASAO	34.55	50.03	2007-333-19-00-20	14.94	-61.27	294	98	156	SKSac	4-25s	Null	Null	Null	Null	Null	-0.76	0	fairNull
BI.ASAO	34.55	50.03	2007-347-07-23-39	-23.2	-70.55	266	127	16	SKKSac	5-20s	0.96	37	33	0.88	0.88	5.12	2	fair
BI.ASAO	34.55	50.03	2008-005-11-01-06	51.25	-130.75	0	95	15	SKSac	4-25s	0.94	-57	11	0.92	0.26	-0.76	0	fair
BI.ASAO	34.55	50.03	2008-043-12-50-18	16.36	-94.3	320	119	83	SKKSac	5-20s	Null	Null	Null	Null	Null	14.5	8.32	goodNull
BI.ASAO	34.55	50.03	2008-084-20-39-07	-20.04	-68.96	268	125	120	SKKSac	5-20s	Null	Null	Null	Null	Null	18.27	8.54	goodNull
BI.ASAO	34.55	50.03	2008-084-20-39-07	-20.04	-68.96	268	125	120	SKSac	4-25s	Null	Null	Null	Null	Null	-0.76	0	fairNull
BI.ASAO	34.55	50.03	2008-119-15-57-55	-58.74	-24.71	213	112	35	SKKSac	5-20s	0.98	51	61	1.38	2.48	8.96	3.73	fair
BI.ASAO	34.55	50.03	2008-190-09-13-07	-15.99	-71.75	274	125	123	SKSac	5-20s	Null	Null	Null	Null	Null	5.43	5.69	goodNull
BI.ASAO	34.55	50.03	2008-201-09-27-01	-11.04	164.49	85	116	11	SKKSac	5-20s	0.94	-36	61	0.72	3.3	6.9	4.49	fair
BI.ASAO	34.55	50.03	2008-232-16-30-13	-15.09	-173.48	75	136	8	SKKSac	5-20s	0.95	-41	12	1.96	0.7	9.05	1.62	fair
BI.ASAO	34.55	50.03	2008-239-21-00-36	-7.64	-74.38	284	122	154	SKKSac	5-20s	Null	Null	Null	Null	Null	14.26	5.29	goodNull
BI.ASAO	34.55	50.03	2008-239-21-00-36	-7.64	-74.38	284	122	154	SKSac	4-25s	Null	Null	Null	Null	Null	-0.76	0	fairNull
BI.ASAO	34.55	50.03	2008-243-06-54-07	-6.15	147.26	91	99	75	SKSac	5-20s	0.97	-14	56	1.76	2.26	9.31	3.68	fair
BI.ASAO	34.55	50.03	2008-247-11-25-14	-26.74	-63.23	258	123	569	SKSac	5-20s	0.98	0	17	1.24	0.75	10.64	4.62	fair
BI.ASAO	34.55	50.03	2009-163-09-44-15	-17.61	167.81	90	122	15	SKKSac	5-20s	0.96	-45	31	1	0.8	10.35	3.34	fair
BI.ASAO	34.55	50.03	2009-163-09-44-15	-17.61	167.81	90	122	15	SKSac	5-20s	0.96	-77	64	1.38	2.64	9.79	4.56	fair
BI.ASAO	34.55	50.03	2009-174-14-19-22	-5.16	153.78	86	104	64	SKKSac	5-20s	Null	Null	Null	Null	Null	12.49	7.12	goodNull
BI.ASAO	34.55	50.03	2009-193-06-12-47	-15.04	-70.44	274	123	199	SKSac	4-25s	0.93	18	14	1.23	0.87	-0.76	0	fair
BI.ASAO	34.55	50.03	2009-245-18-00-09	-29.39	-178.96	97	138	257	PKSbc	5-20s	0.95	-8	19	2.08	1.34	7.81	2.69	fair
BI.ASAO	34.55	50.03	2009-313-10-44-55	-17.24	178.33	83	131	595	PKSbc	4-25s	0.94	-39	35	0.82	0.97	-0.76	0	fair
BI.ASAO	34.55	50.03	2009-321-15-30-47	52.12	-131.4	1	94	17	SKSac	4-25s	0.92	-76	10	1.33	0.82	-0.76	0	fair
BI.ASAO	34.55	50.03	2010-070-14-39-43	-34.29	-71.89	253	133	11	PKSbc	4-25s	0.91	-2	14	0.92	0.67	-0.76	0	fair
BI.ASAO	34.55	50.03	2010-075-02-21-57	-36.22	-73.26	251	134	18	SKKSac	5-20s	0.97	11	35	0.78	0.55	15.33	4.05	fair
BI.ASAO	34.55	50.03	2010-079-14-00-49	-3.36	152.25	86	102	414	SKSac	5-20s	0.94	-46	35	0.88	0.72	4.83	2.44	fair
BI.ASAO	34.55	50.03	2010-092-22-58-07	-36.23	-72.88	251	134	24	PKSbc	5-20s	0.98	-11	4	2.02	0.76	16.22	4.44	fair
BI.ASAO	34.55	50.03	2010-092-22-58-07	-36.23	-72.88	251	134	24	SKKSac	4-25s	0.9	56	6	1.33	0.56	-0.76	0	fair
BI.ASAO	34.55	50.03	2010-224-11-54-15	-1.27	-77.31	292	121	206	SKKSac	5-20s	0.96	54	47	0.56	1.28	18.02	5.9	fair
BI.ASAO	34.55	50.03	2010-224-11-54-15	-1.27	-77.31	292	121	206	SKSac	5-20s	Null	Null	Null	Null	Null	7.15	7.44	goodNull
BI.ASAO	34.55	50.03	2011-031-06-03-27	-22.01	-175.62	85	138	76	SKKSac	5-20s	0.96	-29	18	2.14	1.09	5.62	1.47	fair
BI.ASAO	34.55	50.03	2011-038-19-53-42	-7.15	155.18	87	106	415	SKKSac	5-20s	0.97	-24	9	1.9	0.58	11.43	2.28	fair
BI.ASAO	34.55	50.03	2011-065-12-31-59	-18.02	-69.36	271	124	118	SKKSac	4-25s	0.91	18	17	1.95	1.28	-0.76	0	fair
BI.ASAO	34.55	50.03	2011-065-12-31-59	-18.02	-69.36	271	124	118	SKSac	5-20s	0.99	9	15	2.08	1.82	11.07	4.72	fair
BI.ASAO	34.55	50.03	2011-065-14-32-36	-56.42	-27.06	216	112	87	SKSac	5-20s	Null	Null	Null	Null	Null	10.22	5.31	goodNull
BI.ASAO	34.55	50.03	2011-065-14-32-36	-56.42	-27.06	216	112	88	SKKSac	4-25s	Null	Null	Null	Null	Null	-0.76	0	fairNull
BI.ASAO	34.55	50.03	2011-097-13-11-22	17.21	-94.34	321	118	166	SKKSac	5-20s	0.99	-86	19	0.12	0.22	9.62	10.56	good
BI.ASAO	34.55	50.03	2011-097-13-11-22	17.21	-94.34	321	118	166	SKSac	5-20s	Null	Null	Null	Null	Null	19.31	25.04	goodNull
BI.ASAO	34.55	50.03	2011-171-16-36-01	-21.7	-68.23	266	125	128	SKKSac	4-25s	0.92	6	9	1.44	0.97	-0.76	0	fair
BI.ASAO	34.55	50.03	2011-171-16-36-01	-21.7	-68.23	266	125	128	SKSac	4-25s	0.95	6	11	1.44	1.08	-0.76	0	fair
BI.ASAO	34.55	50.03	2011-196-13-26-02	-60.76	-23.52	211	112	10	SKKSac	5-20s	Null	Null	Null	Null	Null	9.21	3.94	fairNull
BI.ASAO	34.55	50.03	2011-246-04-48-57	-56.45	-26.85	216	111	84	SKKSac	5-20s	Null	Null	Null	Null	Null	14.76	7.97	goodNull
BI.ASAO	34.55	50.03	2011-246-04-48-57	-56.45	-26.85	216	111	84	SKSac	5-20s	0.95	46	59	1.74	2.19	7.73	4.49	fair
BI.ASAO	34.55	50.03	2011-252-19-41-34	49.53	-126.89	358	96	22	SKSac	5-20s	0.94	-68	35	1	0.92	5.82	2.82	fair
BI.ASAO	34.55	50.03	2011-341-22-23-09	-27.9	-70.92	260	130	20	SKKSac	5-20s	0.96	3	14	1.8	1.05	9.9	3.3	fair
BI.ASAO	34.55	50.03	2011-341-22-23-09	-27.9	-70.92	260	130	20	SKSac	5-20s	0.94	38	39	0.8	0.83	6.19	2.3	fair
BI.ASAO	34.55	50.03	2011-348-05-04-58	-7.55	146.81	92	100	135	SKSac	5-20s	Null	Null	Null	Null	Null	9.05	4.37	goodNull
BI.ASAO	34.55	50.03	2012-021-18-47-11	14.87	-93	318	120	45	SKKSac	5-20s	Null	Null	Null	Null	Null	14.75	9.53	goodNull
BI.ASAO	34.55	50.03	2012-021-18-47-11	14.87	-93	318	120	45	SKSac	4-25s	Null	Null	Null	Null	Null	-0.76	0	fairNull
BI.ASAO	34.55	50.03	2012-023-16-04-52	-36.41	-73.03	251	134	20	PKSbc	4-25s	0.93	-11	4	1.64	0.67	-0.76	0	fair
BI.ASAO	34.55	50.03	2012-023-16-04-52	-36.41	-73.03	251	134	20	SKKSac	4-25s	0.94	27	22	0.72	0.31	-0.76	0	fair
BI.ASAO	34.55	50.03	2013-304-23-03-59	-30.29	-71.52	258	131	27	PKSbc	4-25s	0.92	8	24	0.82	0.72	-0.76	0	fair
BI.ASAO	34.55	50.03	2014-001-16-03-29	-13.86	167.25	86	120	187	SKKSac	4-25s	0.95	-18	21	1.74	1.49	-0.76	0	fair
BI.ASAO	34.55	50.03	2014-180-07-52-55	-55.47	-28.37	217	112	8	SKKSac	5-20s	0.97	60	42	0.7	0.69	42.71	7.53	fair
BI.ASAO	34.55	50.03	2014-202-14-54-41	-19.8	-178.4	84	135	615	SKKSac	5-20s	0.95	-27	68	0.78	3.13	7.35	4.64	fair
BI.ASAO	34.55	50.03	2014-210-10-46-14	17.68	-95.65	322	119	107	SKSac	5-20s	Null	Null	Null	Null	Null	11.74	6.95	goodNull
BI.ASAO	34.55	50.03	2014-267-11-16-15	-23.8	-66.63	263	124	224	SKKSac	4-25s	0.95	19	22	0.72	0.56	-0.76	0	fair
BI.ASAO	34.55	50.03	2014-279-14-04-05	15.41	147.23	73	87	4	SKSac	4-25s	0.91	-42	6	1.74	0.41	-0.76	0	fair
BI.ASAO	34.55	50.03	2014-320-22-33-20	-37.65	179.66	109	140	22	SKKSac	5-20s	Null	Null	Null	Null	Null	15.13	8.41	goodNull
BI.ASAO	34.55	50.03	2014-342-08-54-52	7.94	-82.69	304	119	20	SKSac	5-20s	0.95	-23	54	0.8	3.22	6.4	3.57	fair
BI.ASAO	34.55	50.03	2015-023-03-47-27	-17.03	168.52	89	123	219	SKKSac	5-20s	0.97	-65	38	1.14	0.94	12.19	3.93	fair
BI.ASAO	34.55	50.03	2015-023-03-47-27	-17.03	168.52	89	123	220	SKSac	4-25s	Null	Null	Null	Null	Null	-0.76	0	fairNull
BI.ASAO	34.55	50.03	2015-031-12-29-30	15.24	147.12	74	87	5	SKSac	4-25s	0.91	-45	10	1.33	0.46	-0.76	0	fair
BI.ASAO	34.55	50.03	2015-042-18-57-22	-23.11	-66.69	264	124	223	SKKSac	4-25s	0.94	5	7	1.54	0.77	-0.76	0	fair
BI.ASAO	34.55	50.03	2015-042-18-57-22	-23.11	-66.69	264	124	223	SKSac	4-25s	0.92	3	5	2.05	1.18	-0.76	0	fair
BI.ASAO	34.55	50.03	2015-112-22-57-15	-12.04	166.43	85	118	72	SKKSac	5-20s	0.95	-16	52	1.86	2.07	8.07	4.28	fair
BI.ASAO	34.55	50.03	2015-112-22-57-15	-12.04	166.43	85	118	72	SKSac	5-20s	0.98	-14	26	1.64	1.55	11.21	5.37	fair
BI.ASAO	34.55	50.03	2015-224-18-49-24	-9.33	157.88	88	110	6	SKKSac	5-20s	0.97	-10	81	2.04	1.98	10.07	4.99	fair
BI.ASAO	34.55	50.03	2015-259-14-03-22	-6.01	151.48	88	103	6	SKSac	5-20s	0.98	-38	27	0.9	0.64	9.37	2.87	fair
BI.ASAO	34.55	50.03	2015-259-22-59-15	-31.62	-71.75	256	132	26	SKKSac	5-20s	0.98	6	15	1.4	0.66	29.29	4.24	fair
BI.ASAO	34.55	50.03	2015-260-03-55-15	-31.42	-71.69	257	132	27	PKSbc	5-20s	0.98	-4	10	1.8	1.19	12.7	4.72	fair
BI.ASAO	34.55	50.03	2015-260-04-10-27	-31.52	-71.8	256	132	23	PKSbc	4-25s	0.91	2	20	0.82	0.72	-0.76	0	fair
BI.ASAO	34.55	50.03	2015-260-04-10-27	-31.52	-71.8	256	132	23	SKSac	5-20s	0.93	34	31	1.28	0.61	9.25	2.85	fair
BI.ASAO	34.55	50.03	2015-261-09-10-44	-32.37	-72.23	256	132	8	PKSbc	5-20s	0.98	0	62	1.08	1.96	8.71	4.78	fair
BI.ASAO	34.55	50.03	2015-262-05-06-47	-29.64	-72.08	259	131	6	PKSbc	4-25s	0.94	7	36	0.72	0.97	-0.76	0	fair
BI.ASAO	34.55	50.03	2015-262-12-52-20	-32.33	-72.06	256	132	18	PKSbc	4-25s	0.94	-2	17	1.03	0.82	-0.76	0	fair
BI.ASAO	34.55	50.03	2015-264-05-39-34	-31.58	-71.74	256	132	30	PKSbc	4-25s	0.95	2	10	1.03	0.56	-0.76	0	good
BI.ASAO	34.55	50.03	2015-264-17-40-00	-31.73	-71.38	256	131	35	PKSbc	5-20s	0.95	3	18	1.2	0.67	7.63	2.95	fair
BI.ASAO	34.55	50.03	2015-278-16-33-26	-30.3	-71.53	258	131	34	PKSbc	4-25s	0.94	18	22	0.51	0.31	-0.76	0	fair
BI.ASAO	34.55	50.03	2015-293-21-52-02	-14.86	167.3	87	121	135	SKKSac	5-20s	0.95	-23	38	1.96	1.83	7.35	2.62	fair
BI.ASAO	34.55	50.03	2015-293-21-52-02	-14.86	167.3	87	121	135	SKSac	5-20s	0.98	-58	33	0.42	2.29	16.77	7.31	fair
BI.ASAO	34.55	50.03	2015-311-07-31-43	-30.88	-71.45	257	131	46	PKSbc	4-25s	0.93	0	17	0.82	0.67	-0.76	0	fair
BI.ASAO	34.55	50.03	2016-001-02-00-39	-50.56	139.45	135	115	10	SKKSac	5-20s	Null	Null	Null	Null	Null	11.12	4.83	goodNull
BI.ASAO	34.55	50.03	2016-041-00-33-05	-30.57	-71.58	258	131	29	PKSbc	4-25s	0.93	-2	5	1.54	0.62	-0.76	0	fair
BI.ASAO	34.55	50.03	2016-097-06-58-48	-14.07	166.62	87	120	24	SKSac	5-20s	Null	Null	Null	Null	Null	14.89	5.42	goodNull
BI.ASAO	34.55	50.03	2016-105-21-50-27	-14.53	166.43	88	120	16	SKSac	5-20s	Null	Null	Null	Null	Null	6.59	4.49	goodNull
BI.ASAO	34.55	50.03	2016-106-14-11-26	13.4	-92.37	316	120	22	SKKSac	5-20s	0.96	36	37	1.46	2.02	8.77	4.71	fair
BI.ASAO	34.55	50.03	2016-110-05-25-39	-55.73	-27.23	216	111	14	SKKSac	5-20s	0.99	48	61	1.5	2.32	16.17	5.75	fair
BI.ASAO	34.55	50.03	2016-111-08-33-47	0.64	-80.21	296	122	14	SKSac	5-20s	Null	Null	Null	Null	Null	9.36	5.64	goodNull
BI.ASAO	34.55	50.03	2016-141-18-14-04	-25.57	129.88	117	96	10	SKSac	4-25s	Null	Null	Null	Null	Null	-0.76	0	fairNull
BI.ASAO	34.55	50.03	2016-301-11-53-17	53.59	-163.26	19	88	13	SKSac	4-25s	0.96	-60	5	1.44	0.56	-0.76	0	fair
BI.ASAO	34.55	50.03	2016-301-20-32-55	-33.78	-72.53	254	133	13	PKSbc	4-25s	0.93	3	31	0.72	0.77	-0.76	0	fair
BI.BJRD	37.7	57.41	2008-039-09-38-14	10.67	-41.9	284	91	9	SKSac	4-25s	0.92	39	21	1.13	0.72	1.69	0	fair
BI.BJRD	37.7	57.41	2008-043-12-50-18	16.36	-94.3	328	120	83	SKKSac	5-20s	0.96	73	45	1.44	2.03	10.02	4.61	fair
BI.BJRD	37.7	57.41	2008-043-12-50-18	16.36	-94.3	328	120	83	SKSac	4-25s	0.96	-45	58	0.92	1.03	1.69	0	fair
BI.BJRD	37.7	57.41	2008-072-11-23-34	-16.57	167.34	92	116	13	SKSac	4-25s	Null	Null	Null	Null	Null	1.69	0	fairNull
BI.BJRD	37.7	57.41	2008-084-20-39-07	-20.04	-68.96	275	131	120	SKKSac	4-25s	Null	Null	Null	Null	Null	1.69	0	fairNull
BI.BJRD	37.7	57.41	2008-155-16-20-50	-10.51	161.27	90	107	84	SKKSac	5-20s	0.98	64	61	0.62	1.46	12.36	5.14	fair
BI.BJRD	37.7	57.41	2008-201-22-39-52	-17.34	-177.31	83	128	391	SKKSac	4-25s	Null	Null	Null	Null	Null	1.69	0	fairNull
BI.BJRD	37.7	57.41	2008-239-21-00-36	-7.64	-74.38	292	127	154	SKKSac	4-25s	0.96	44	8	1.33	0.41	1.69	0	good
BI.BJRD	37.7	57.41	2008-241-12-37-35	50.16	-129.63	5	92	12	SKSac	4-25s	0.95	78	8	1.13	0.51	1.69	0	good
BI.BJRD	37.7	57.41	2008-243-06-54-07	-6.15	147.26	95	94	75	SKSac	4-25s	Null	Null	Null	Null	Null	1.69	0	fairNull
BI.BJRD	37.7	57.41	2008-247-11-25-14	-26.74	-63.23	264	129	570	PKSbc	4-25s	0.94	33	30	0.51	0.41	1.69	0	fair
BI.BJRD	37.7	57.41	2008-252-03-03-15	-19.96	169.11	94	119	36	SKKSac	4-25s	Null	Null	Null	Null	Null	1.69	0	fairNull
BI.BJRD	37.7	57.41	2008-279-09-12-36	-30.18	-177.18	97	135	10	SKKSac	4-25s	Null	Null	Null	Null	Null	1.69	0	fairNull
BI.BJRD	37.7	57.41	2008-285-10-40-14	19.16	-64.83	305	102	23	SKSac	5-20s	0.96	-82	9	1.22	0.25	16.81	2.21	fair
BI.BJRD	37.7	57.41	2008-302-16-00-03	-3.49	145.87	94	91	18	SKSac	5-20s	0.96	55	33	0.6	0.9	4.14	3.03	fair
BI.BJRD	37.7	57.41	2008-309-18-35-45	-17.14	168.46	91	117	206	SKKSac	4-25s	Null	Null	Null	Null	Null	1.69	0	fairNull
BI.BJRD	37.7	57.41	2008-309-18-35-45	-17.14	168.46	91	117	206	SKSac	4-25s	Null	Null	Null	Null	Null	1.69	0	fairNull
BI.BJRD	37.7	57.41	2009-059-14-33-06	-60.52	-24.8	214	118	15	SKSac	5-20s	0.95	69	24	1.22	0.71	7.23	2	fair
BI.BJRD	37.7	57.41	2009-193-06-12-47	-15.04	-70.44	282	129	198	SKSac	5-20s	0.98	24	45	1.02	1.19	12.47	6.11	fair
BI.BJRD	37.7	57.41	2009-242-14-51-32	-15.22	-172.57	77	131	11	PKSbc	5-20s	0.99	86	5	1.72	0.77	19.75	4.86	fair
BI.BJRD	37.7	57.41	2009-245-18-00-09	-29.39	-178.96	97	133	257	PKSbc	5-20s	0.94	52	34	0.64	1.06	5.17	3.16	fair
BI.BJRD	37.7	57.41	2009-245-18-00-09	-29.39	-178.96	97	133	257	SKKSac	5-20s	0.97	27	45	0.92	1.07	12.35	4.57	fair
BI.BJRD	37.7	57.41	2009-313-10-44-55	-17.24	178.33	85	125	595	SKKSac	5-20s	Null	Null	Null	Null	Null	10.68	4.21	goodNull
BI.BJRD	37.7	57.41	2009-313-10-44-55	-17.24	178.33	85	125	595	SKSac	5-20s	Null	Null	Null	Null	Null	10.28	7.42	goodNull
BI.BJRD	37.7	57.41	2009-317-03-05-57	-19.39	-70.32	277	131	27	PKSbc	5-20s	0.99	23	27	0.88	0.72	22.81	6.47	fair
BI.BJRD	37.7	57.41	2009-318-19-44-29	-22.96	-66.64	270	130	220	SKKSac	5-20s	0.99	51	26	0.7	0.31	17.8	3.73	fair
BI.BJRD	37.7	57.41	2009-326-07-48-20	-17.79	-178.43	84	128	522	SKKSac	5-20s	Null	Null	Null	Null	Null	8.33	4.86	goodNull
BI.BJRD	37.7	57.41	2009-328-12-47-15	-20.71	-174.03	84	133	18	PKSbc	4-25s	Null	Null	Null	Null	Null	1.69	0	fairNull
BI.BJRD	37.7	57.41	2010-062-17-44-25	-36.61	-73.36	256	141	20	PKSdf	5-20s	0.93	-72	28	1.18	0.65	6.93	2.7	fair
BI.BJRD	37.7	57.41	2010-079-14-00-49	-3.36	152.25	90	96	414	SKSac	5-20s	Null	Null	Null	Null	Null	19.86	6.98	goodNull
BI.BJRD	37.7	57.41	2010-126-02-42-47	-18.06	-70.55	278	131	37	PKSbc	5-20s	0.98	20	44	1.04	1.13	14.44	5.66	fair
BI.BJRD	37.7	57.41	2010-144-16-18-29	-8.09	-71.56	289	125	581	SKKSac	5-20s	0.97	29	8	1.82	1.01	10.92	4.38	fair
BI.BJRD	37.7	57.41	2010-147-17-14-46	-13.7	166.64	89	113	31	SKKSac	5-20s	Null	Null	Null	Null	Null	10.86	4.22	goodNull
BI.BJRD	37.7	57.41	2010-216-07-15-33	-5.49	146.82	95	93	220	SKSac	5-20s	0.97	50	25	0.48	0.58	7.29	4.74	fair
BI.BJRD	37.7	57.41	2010-224-11-54-15	-1.27	-77.31	300	125	206	SKKSac	5-20s	0.96	74	21	0.24	0.32	7.56	6.22	good
BI.BJRD	37.7	57.41	2010-224-11-54-15	-1.27	-77.31	300	125	206	SKSac	5-20s	Null	Null	Null	Null	Null	9.62	9.61	goodNull
BI.BJRD	37.7	57.41	2010-227-15-09-29	-5.69	148.34	94	94	174	SKSac	5-20s	0.99	34	33	0.3	0.48	4.09	3.57	fair
BI.BJRD	37.7	57.41	2010-252-07-28-01	-37.03	-73.41	255	141	16	SKKSac	5-20s	0.97	-8	75	1.48	2.5	18	6.74	fair
BI.BJRD	37.7	57.41	2010-342-05-24-35	-56.41	-25.74	218	117	29	SKSac	5-20s	0.97	-71	63	1.06	2.03	6	3.43	fair
BI.BJRD	37.7	57.41	2010-347-01-14-42	-6.53	155.65	90	100	135	SKSac	5-20s	0.98	-54	24	0.22	0.28	4.99	4.55	good
BI.BJRD	37.7	57.41	2010-359-13-16-37	-19.7	167.95	94	118	16	SKKSac	4-25s	Null	Null	Null	Null	Null	1.69	0	fairNull
BI.BJRD	37.7	57.41	2011-009-10-03-43	-19.16	168.31	93	118	22	SKKSac	5-20s	Null	Null	Null	Null	Null	14.96	5.25	goodNull
BI.BJRD	37.7	57.41	2011-009-10-03-43	-19.16	168.31	93	118	22	SKSac	5-20s	Null	Null	Null	Null	Null	14.46	9.08	goodNull
BI.BJRD	37.7	57.41	2011-065-12-31-59	-18.02	-69.36	278	130	118	SKKSac	5-20s	0.94	61	29	0.8	1.88	5.57	3.07	fair
BI.BJRD	37.7	57.41	2011-065-12-31-59	-18.02	-69.36	278	130	118	SKSac	5-20s	0.98	82	6	1.12	2.1	8.41	4.64	fair
BI.BJRD	37.7	57.41	2011-065-14-32-36	-56.42	-27.06	219	118	87	SKSac	5-20s	0.99	-66	37	0.94	0.95	22.7	5.96	fair
BI.BJRD	37.7	57.41	2011-093-14-07-09	-17.64	-178.59	84	127	551	SKSac	5-20s	0.97	39	24	0.24	0.38	7.23	6.4	fair
BI.BJRD	37.7	57.41	2011-097-13-11-22	17.21	-94.34	329	119	166	SKKSac	5-20s	0.97	-75	29	0.62	1.84	6.26	4.12	good
BI.BJRD	37.7	57.41	2011-097-13-11-22	17.21	-94.34	329	119	166	SKSac	5-20s	0.99	-86	27	0.7	0.62	7.11	3.96	good
BI.BJRD	37.7	57.41	2011-113-04-16-54	-10.38	161.2	90	107	79	SKSac	5-20s	0.94	50	30	0.48	0.76	5.25	4.14	fair
BI.BJRD	37.7	57.41	2011-171-16-36-01	-21.7	-68.23	273	131	128	SKKSac	4-25s	0.94	62	22	1.23	0.72	1.69	0	fair
BI.BJRD	37.7	57.41	2011-236-17-46-11	-7.64	-74.53	292	127	147	SKKSac	4-25s	0.94	44	8	1.23	0.41	1.69	0	fair
BI.BJRD	37.7	57.41	2011-236-23-06-17	-18.16	167.73	93	117	13	SKSac	5-20s	Null	Null	Null	Null	Null	11.45	4	goodNull
BI.BJRD	37.7	57.41	2011-280-08-58-28	-32.51	-179.04	101	134	36	PKSbc	5-20s	0.99	52	28	0.46	0.36	8.18	4.56	fair
BI.BJRD	37.7	57.41	2011-301-18-54-34	-14.44	-75.97	287	133	24	PKSbc	4-25s	0.93	64	20	0.62	0.21	1.69	0	good
BI.BJRD	37.7	57.41	2011-348-05-04-58	-7.55	146.81	96	94	135	SKSac	4-25s	Null	Null	Null	Null	Null	1.69	0	fairNull
BI.BJRD	37.7	57.41	2012-021-18-47-11	14.87	-93	326	121	45	SKKSac	5-20s	0.98	-72	52	0.5	2.96	8.16	5.23	fair
BI.BJRD	37.7	57.41	2012-021-18-47-11	14.87	-93	326	121	45	SKSac	5-20s	0.98	-88	33	0.38	1.55	15.42	7.01	fair
BI.BJRD	37.7	57.41	2012-024-00-52-05	-24.98	178.52	94	129	580	SKSac	5-20s	0.97	-38	48	0.3	3.22	8.55	6.1	fair
BI.BJRD	37.7	57.41	2012-105-10-56-19	-57.68	-65.31	223	138	15	PKSbc	5-20s	0.96	-72	61	0.7	2.19	6.25	3.65	fair
BI.BJRD	37.7	57.41	2012-105-22-05-26	-18.97	168.74	93	118	11	SKKSac	5-20s	Null	Null	Null	Null	Null	9.74	3.34	fairNull
BI.BJRD	37.7	57.41	2012-135-10-00-40	-17.68	-69.59	278	130	105	SKKSac	5-20s	0.94	53	26	1	0.44	7.2	2.22	fair
BI.BJRD	37.7	57.41	2012-135-10-00-40	-17.68	-69.59	278	130	105	SKSac	5-20s	0.96	28	63	0.86	2.23	8.08	4.14	fair
BI.BJRD	37.7	57.41	2012-149-05-07-23	-28.04	-63.09	263	130	586	PKSbc	5-20s	0.97	40	19	0.28	0.22	7.56	5.74	fair
BI.BJRD	37.7	57.41	2012-159-04-05-04	-36.07	-70.57	256	139	8	SKKSac	5-20s	0.97	-23	76	1.5	2.39	10.13	5.06	fair
BI.BJRD	37.7	57.41	2012-159-16-03-18	-15.88	-72.41	282	131	110	PKSbc	5-20s	0.96	49	19	1.32	0.59	6.15	1.76	fair
BI.BJRD	37.7	57.41	2012-159-16-03-18	-15.88	-72.41	282	131	110	SKKSac	5-20s	0.93	37	19	1.3	0.73	7.68	2.57	fair
BI.BJRD	37.7	57.41	2012-188-02-28-22	-14.66	167.34	90	115	160	SKSac	5-20s	Null	Null	Null	Null	Null	8.82	4.56	goodNull
BI.BJRD	37.7	57.41	2012-210-20-03-56	-4.65	153.17	90	97	41	SKSac	5-20s	Null	Null	Null	Null	Null	25.4	11.33	goodNull
BI.BJRD	37.7	57.41	2012-215-09-38-30	-8.41	-74.26	291	128	144	SKKSac	5-20s	0.97	45	13	1.52	0.63	10.57	2.33	good
BI.BJRD	37.7	57.41	2012-215-09-56-41	-4.65	153.28	90	97	46	SKKSac	5-20s	0.97	47	24	0.28	0.32	7.62	5.56	fair
BI.BJRD	37.7	57.41	2012-215-09-56-41	-4.65	153.28	90	97	46	SKSac	5-20s	Null	Null	Null	Null	Null	17.3	8.39	goodNull
BI.BJRD	37.7	57.41	2012-312-16-35-46	13.99	-91.89	325	121	24	SKSac	5-20s	0.98	-81	32	0.84	0.83	13.79	4.02	fair
BI.BJRD	37.7	57.41	2012-319-19-02-06	-29.12	-71.19	266	137	63	SKKSac	5-20s	Null	Null	Null	Null	Null	12.18	6.64	goodNull
BI.BJRD	37.7	57.41	2012-356-22-28-08	-14.34	167.29	90	114	200	SKKSac	5-20s	Null	Null	Null	Null	Null	7.55	9.75	goodNull
BI.BJRD	37.7	57.41	2012-356-22-28-08	-14.34	167.29	90	114	200	SKSac	5-20s	0.96	53	29	0.5	0.5	4.26	3.23	fair
BI.BJRD	37.7	57.41	2013-030-20-15-43	-28.09	-70.65	267	136	45	PKSbc	4-25s	0.92	68	38	1.13	1.9	1.69	0	fair
BI.BJRD	37.7	57.41	2013-040-14-16-07	1.14	-77.39	302	123	145	SKKSac	5-20s	0.97	65	21	0.68	0.32	15.21	5.33	fair
BI.BJRD	37.7	57.41	2013-040-14-16-07	1.14	-77.39	302	123	145	SKSac	5-20s	Null	Null	Null	Null	Null	6.43	3.78	fairNull
BI.BJRD	37.7	57.41	2013-112-01-16-32	18.08	-102.18	337	121	30	SKKSac	5-20s	0.99	-42	51	0.98	1.17	15.24	5.43	fair
BI.BJRD	37.7	57.41	2013-116-06-53-28	-28.68	-178.92	96	133	351	SKKSac	5-20s	0.96	52	22	0.4	0.34	6.64	4.72	fair
BI.BJRD	37.7	57.41	2013-131-20-46-57	-17.96	-175.11	82	130	212	PKSbc	5-20s	1	-52	25	0.18	0.16	25.31	11	good
BI.BJRD	37.7	57.41	2013-143-21-07-46	-20.58	-175.76	85	131	150	SKSac	5-20s	Null	Null	Null	Null	Null	12.13	5.39	goodNull
BI.BJRD	37.7	57.41	2013-166-11-20-36	-33.85	179.4	104	133	195	PKSbc	5-20s	0.98	45	35	0.58	0.78	7.76	3.69	fair
BI.BJRD	37.7	57.41	2013-175-22-04-13	10.7	-42.59	284	91	10	SKSac	5-20s	0.98	33	42	1.36	2.13	11.15	4.42	fair
BI.BJRD	37.7	57.41	2013-188-20-30-06	-6.03	149.71	93	95	56	SKSac	5-20s	Null	Null	Null	Null	Null	25.71	9.04	goodNull
BI.BJRD	37.7	57.41	2013-224-04-16-47	-30.63	-179.68	99	133	340	PKSbc	5-20s	0.96	53	18	0.44	0.24	7.65	4.06	fair
BI.BJRD	37.7	57.41	2013-224-09-49-32	-5.4	-81.93	301	131	10	PKSbc	5-20s	0.99	56	30	0.72	0.64	13.14	3.73	fair
BI.BJRD	37.7	57.41	2013-224-09-49-32	-5.4	-81.93	301	131	10	SKKSac	5-20s	0.95	-72	45	1.18	1.06	7.54	4.29	fair
BI.BJRD	37.7	57.41	2013-268-16-42-43	-15.84	-74.51	284	132	40	PKSbc	5-20s	0.98	74	40	0.62	0.62	19.84	5.01	fair
BI.BJRD	37.7	57.41	2013-296-08-23-30	-23.01	-177.14	89	131	160	SKSac	5-20s	0.96	55	49	0.72	0.99	6.52	3.08	fair
BI.BJRD	37.7	57.41	2013-306-18-53-46	-19.17	-172.64	81	133	10	PKSbc	5-20s	0.99	-72	25	0.4	1.65	14.32	7.21	fair
BI.BJRD	37.7	57.41	2014-001-16-03-29	-13.86	167.25	89	114	187	SKSac	5-20s	Null	Null	Null	Null	Null	8.91	5.47	fairNull
BI.BJRD	37.7	57.41	2014-033-09-26-37	-32.91	-177.88	101	135	44	SKKSac	5-20s	0.99	55	39	0.58	1.88	7.22	4.13	fair
BI.BJRD	37.7	57.41	2014-049-09-27-13	14.67	-58.93	298	101	14	SKSac	5-20s	0.96	63	18	0.92	0.43	22.19	3.34	good
BI.BJRD	37.7	57.41	2014-174-19-19-15	-29.98	-177.72	97	134	20	PKSbc	5-20s	0.98	53	24	0.58	0.42	11.39	4.99	fair
BI.BJRD	37.7	57.41	2014-174-19-21-45	-29.94	-177.52	97	134	10	SKSac	5-20s	Null	Null	Null	Null	Null	10.31	3.61	goodNull
BI.BJRD	37.7	57.41	2014-184-19-50-07	-30.46	-176.45	97	135	35	SKKSac	5-20s	1	49	32	0.36	0.7	6.63	4.98	fair
BI.BJRD	37.7	57.41	2014-188-11-23-54	14.72	-92.46	326	121	53	SKSac	5-20s	0.98	80	43	0.82	1.06	15.76	4.45	fair
BI.BJRD	37.7	57.41	2014-200-12-27-10	-15.82	-174.45	79	130	227	SKSac	5-20s	0.98	-79	16	1.2	1.62	8.42	3.22	fair
BI.BJRD	37.7	57.41	2014-202-14-54-41	-19.8	-178.4	86	129	615	PKSbc	5-20s	0.99	-18	23	1.04	0.72	22.72	5.18	fair
BI.BJRD	37.7	57.41	2014-202-14-54-41	-19.8	-178.4	86	129	615	SKKSac	5-20s	Null	Null	Null	Null	Null	18.11	8.76	goodNull
BI.BJRD	37.7	57.41	2014-202-14-54-41	-19.8	-178.4	86	129	615	SKSac	5-20s	Null	Null	Null	Null	Null	10.89	8.01	goodNull
BI.BJRD	37.7	57.41	2014-210-10-46-14	17.68	-95.65	330	119	107	SKKSac	5-20s	0.98	-47	67	1.18	2.84	8.6	3.91	fair
BI.BJRD	37.7	57.41	2014-210-10-46-14	17.68	-95.65	330	119	107	SKSac	5-20s	0.98	-47	5	1.21	0.51	40.09	4.62	fair
BI.BJRD	37.7	57.41	2014-267-11-16-15	-23.8	-66.63	270	131	224	SKKSac	5-20s	0.99	21	46	0.78	0.96	15.07	5.17	fair
BI.BJRD	37.7	57.41	2014-287-03-51-34	12.53	-88.12	320	120	40	SKSac	4-25s	0.91	-60	14	1.13	0.62	1.69	0	fair
BI.BJRD	37.7	57.41	2014-305-18-57-22	-19.69	-177.76	85	129	434	SKKSac	5-20s	0.97	46	30	0.32	0.44	8.35	5.6	fair
BI.BJRD	37.7	57.41	2015-042-18-57-22	-23.11	-66.69	270	130	223	SKKSac	4-25s	0.95	40	28	0.51	0.31	1.69	0	fair
BI.BJRD	37.7	57.41	2015-047-22-00-53	-55.52	-28.26	220	118	13	SKKSac	5-20s	0.95	64	29	0.86	0.58	5.16	3.79	fair
BI.BJRD	37.7	57.41	2015-050-13-18-32	-16.43	168.15	91	116	10	SKKSac	5-20s	Null	Null	Null	Null	Null	18.42	6.85	goodNull
BI.BJRD	37.7	57.41	2015-082-04-51-38	-18.35	-69.17	277	130	130	SKSac	5-20s	0.94	33	15	1.84	0.91	6.9	1.9	fair
BI.BJRD	37.7	57.41	2015-089-07-56-53	-15.43	-173.05	78	130	10	PKSbc	5-20s	1	-54	34	0.4	0.42	11.28	5.62	fair
BI.BJRD	37.7	57.41	2015-089-08-18-01	-15.39	-172.94	77	130	14	PKSbc	5-20s	1	-53	34	0.36	0.54	13.35	6.36	good
BI.BJRD	37.7	57.41	2015-089-08-48-25	-15.5	-173.03	78	130	11	PKSbc	5-20s	1	86	7	1.66	0.94	23.38	6.06	fair
BI.BJRD	37.7	57.41	2015-097-00-46-21	-15.17	-173.22	77	130	30	PKSbc	4-25s	0.96	-86	75	0.72	0.46	1.69	0	fair
BI.BJRD	37.7	57.41	2015-120-10-45-02	-5.38	151.77	92	97	31	SKKSac	5-20s	Null	Null	Null	Null	Null	14.2	7.4	goodNull
BI.BJRD	37.7	57.41	2015-120-10-45-02	-5.38	151.77	92	97	31	SKSac	5-20s	0.99	45	28	0.32	0.46	9.82	6.31	fair
BI.BJRD	37.7	57.41	2015-120-10-45-02	-5.38	151.77	92	97	31	SKSac	5-20s	0.99	84	5	1.66	0.39	53.83	6.32	fair
BI.BJRD	37.7	57.41	2015-291-16-18-35	-16.2	-173.26	79	131	12	PKSbc	5-20s	0.96	-52	42	0.42	1.36	6.88	4.02	fair
BI.BJRD	37.7	57.41	2015-293-21-52-02	-14.86	167.3	90	115	135	SKSac	5-20s	Null	Null	Null	Null	Null	13.67	4.75	goodNull
BI.BJRD	37.7	57.41	2015-328-22-45-38	-10.54	-70.94	286	126	606	SKKSac	5-20s	0.98	39	36	1	1.12	10.73	4.14	fair
BI.BJRD	37.7	57.41	2015-351-19-49-53	15.8	-93.63	327	120	85	SKSac	5-20s	0.97	-66	48	0.64	1.18	12.39	4.45	fair
BI.BJRD	37.7	57.41	2016-079-11-26-33	18	-60.7	302	100	26	SKSac	5-20s	0.98	87	21	0.58	0.64	12.92	4.71	fair
BI.BJRD	37.7	57.41	2016-094-08-23-52	-14.32	166.86	90	114	26	SKKSac	5-20s	Null	Null	Null	Null	Null	6.16	3.64	fairNull
BI.BJRD	37.7	57.41	2016-097-06-58-48	-14.07	166.62	90	114	24	SKKSac	5-20s	Null	Null	Null	Null	Null	12.39	6.42	goodNull
BI.BJRD	37.7	57.41	2016-098-03-32-53	-13.98	166.59	90	114	27	SKKSac	5-20s	Null	Null	Null	Null	Null	9.68	4.55	goodNull
BI.BJRD	37.7	57.41	2016-106-14-11-26	13.4	-92.37	325	122	22	SKKSac	5-20s	0.99	-64	12	1.36	0.34	12.04	2.15	fair
BI.BJRD	37.7	57.41	2016-141-18-14-04	-25.57	129.88	120	93	10	SKSac	4-25s	0.96	-87	73	0.82	0.36	1.69	0	good
BI.BJRD	37.7	57.41	2016-149-09-46-59	-56.24	-26.94	219	117	78	SKSac	4-25s	0.91	-78	75	1.33	0.62	1.69	0	fair
BI.BJRD	37.7	57.41	2016-234-03-45-23	-55.31	-31.75	221	120	12	SKKSac	4-25s	0.9	-78	64	0.82	0.67	1.69	0	fair
BI.BJRD	37.7	57.41	2016-234-03-45-23	-55.31	-31.75	221	120	12	SKSac	4-25s	0.91	-78	77	0.92	0.36	1.69	0	fair
BI.BJRD	37.7	57.41	2016-244-03-11-34	-3.68	152.79	90	96	476	SKSac	4-25s	Null	Null	Null	Null	Null	1.69	0	fairNull
BI.BNDS	27.4	56.17	2004-197-04-27-14	-17.66	-178.76	91	129	565	SKKSac	5-20s	Null	Null	Null	Null	Null	18.33	7.76	goodNull
BI.BNDS	27.4	56.17	2004-197-04-27-14	-17.66	-178.76	91	129	566	PKSbc	5-20s	0.93	-10	30	0.72	0.87	-0.43	0	fair
BI.BNDS	27.4	56.17	2004-300-20-48-10	-57.07	-24.83	215	108	10	SKSac	5-20s	0.97	74	20	0.56	0.34	6.03	4.06	fair
BI.BNDS	27.4	56.17	2005-016-08-25-04	-25.53	-176.3	100	133	16	PKSbc	5-20s	0.99	-48	26	0.36	0.28	5.15	4.6	good
BI.BNDS	27.4	56.17	2005-038-20-02-17	-4.53	153.19	91	98	37	SKSac	5-20s	0.9	-5	2	1.64	0.62	-0.43	0	fair
BI.BNDS	27.4	56.17	2005-080-12-23-54	-24.98	-63.47	258	126	579	SKSac	5-20s	0.96	39	32	0.6	0.68	6.33	3.26	fair
BI.BNDS	27.4	56.17	2005-099-15-16-27	56.17	-154.52	17	93	14	SKSac	5-20s	0.95	2	14	0.84	1.36	7.37	4.77	fair
BI.BNDS	27.4	56.17	2005-101-17-08-53	-21.98	170.61	100	121	68	SKKSac	5-20s	0.9	2	4	1.85	0.82	-0.43	0	fair
BI.BNDS	27.4	56.17	2005-101-17-08-53	-21.98	170.61	100	121	68	SKSac	5-20s	0.91	-6	19	1.44	1.03	-0.43	0	fair
BI.BNDS	27.4	56.17	2005-136-03-54-14	-32.59	-179.35	110	132	34	PKSbc	5-20s	0.94	8	13	1.23	0.92	-0.43	0	fair
BI.BNDS	27.4	56.17	2005-138-09-10-53	-56.41	-26.86	216	109	102	SKSac	5-20s	Null	Null	Null	Null	Null	6.66	4.82	goodNull
BI.BNDS	27.4	56.17	2005-153-10-56-01	-24.22	-67	260	129	196	SKKSac	5-20s	0.97	27	28	0.32	0.52	4.71	4.63	good
BI.BNDS	27.4	56.17	2005-153-10-56-01	-24.22	-67	260	129	196	SKSdf	5-20s	0.95	27	29	0.24	0.66	4.5	4.4	fair
BI.BNDS	27.4	56.17	2005-164-22-44-33	-19.99	-69.2	266	130	115	SKKSac	5-20s	0.98	33	29	0.86	0.82	8.25	4.16	fair
BI.BNDS	27.4	56.17	2005-164-22-44-33	-19.99	-69.2	266	130	115	SKSac	5-20s	0.93	35	24	1.02	0.7	4.51	3.03	fair
BI.BNDS	27.4	56.17	2005-166-10-13-59	-4.59	153.19	91	98	74	SKSac	5-20s	1	-7	5	1.82	0.8	17.37	4.83	fair
BI.BNDS	27.4	56.17	2005-192-23-06-01	-27	-176.32	102	134	10	SKKSac	5-20s	0.96	-5	49	1.2	1.4	11.44	3.94	fair
BI.BNDS	27.4	56.17	2005-269-01-55-37	-5.68	-76.4	287	130	115	PKSbc	5-20s	0.96	60	26	0.52	0.58	5.84	4.36	fair
BI.BNDS	27.4	56.17	2005-269-01-55-37	-5.68	-76.4	287	130	115	SKKSac	5-20s	0.95	61	21	0.6	0.44	5.69	4.08	fair
BI.BNDS	27.4	56.17	2005-321-19-26-54	-22.36	-67.89	263	129	147	SKKSac	5-20s	0.98	38	31	0.42	0.78	10.35	5.53	fair
BI.BNDS	27.4	56.17	2005-321-19-26-54	-22.36	-67.89	263	129	147	SKSac	5-20s	0.96	48	48	0.52	3.5	8.59	5.28	fair
BI.BNDS	27.4	56.17	2006-049-15-59-22	-5.19	152.05	92	98	44	SKSac	5-20s	Null	Null	Null	Null	Null	8.21	3.7	goodNull
BI.BNDS	27.4	56.17	2006-071-20-54-53	-5.08	153.66	91	99	47	SKSac	5-20s	0.9	-11	10	0.92	0.56	-0.43	0	fair
BI.BNDS	27.4	56.17	2006-090-13-21-00	-29.43	-176.77	106	134	13	PKSbc	5-20s	0.94	4	22	1.03	0.92	-0.43	0	fair
BI.BNDS	27.4	56.17	2006-136-10-39-23	-31.81	-179.31	109	132	152	PKSbc	5-20s	0.93	-8	34	0.62	0.87	-0.43	0	fair
BI.BNDS	27.4	56.17	2006-160-05-58-27	-17.53	-178.75	91	129	564	PKSbc	5-20s	0.9	-17	20	0.72	0.62	-0.43	0	fair
BI.BNDS	27.4	56.17	2006-219-22-18-55	-15.8	167.79	95	116	150	SKSac	5-20s	0.91	-9	36	0.92	1.13	-0.43	0	fair
BI.BNDS	27.4	56.17	2006-237-00-44-46	-24.4	-67.03	260	129	184	SKKSac	5-20s	0.99	34	34	0.56	0.72	11.32	4.9	fair
BI.BNDS	27.4	56.17	2006-237-00-44-46	-24.4	-67.03	260	129	184	SKSac	5-20s	0.97	30	29	0.34	0.4	8.12	5.41	fair
BI.BNDS	27.4	56.17	2006-255-13-30-55	-28.94	-68.9	255	132	114	PKSbc	5-20s	0.96	35	23	0.34	0.28	5.44	4.21	fair
BI.BNDS	27.4	56.17	2006-273-16-26-56	-15.59	-73.16	273	132	107	SKKSac	5-20s	0.99	41	29	0.64	0.48	4.41	3.07	fair
BI.BNDS	27.4	56.17	2006-290-01-25-12	-5.88	150.98	93	97	32	SKSac	5-20s	Null	Null	Null	Null	Null	-0.43	0	fairNull
BI.BNDS	27.4	56.17	2006-291-10-45-32	-15.05	167.27	94	115	115	SKSac	5-20s	0.98	-5	16	2.14	1.88	7.39	3.77	fair
BI.BNDS	27.4	56.17	2006-293-10-48-56	-13.46	-76.68	278	134	23	PKSbc	5-20s	0.98	46	25	0.34	0.38	5.9	4.79	good
BI.BNDS	27.4	56.17	2006-311-17-38-33	-6.48	151.19	93	97	11	SKSac	5-20s	Null	Null	Null	Null	Null	-0.43	0	fairNull
BI.BNDS	27.4	56.17	2006-320-20-29-54	-52	139.47	140	107	10	SKSac	5-20s	0.95	11	25	1.18	1.06	6.13	2.11	fair
BI.BNDS	27.4	56.17	2006-334-11-33-17	-21.3	-174.68	94	134	13	SKSac	5-20s	0.97	33	50	0.68	1.46	7.43	3.81	fair
BI.BNDS	27.4	56.17	2007-008-20-52-20	-18.58	-177.85	92	130	406	PKSbc	5-20s	0.98	-7	6	1.96	0.8	11.19	3.6	fair
BI.BNDS	27.4	56.17	2007-289-21-05-43	-25.77	179.53	102	130	509	SKKSac	5-20s	0.97	-46	44	0.54	1.86	5.52	3.65	fair
BI.BNDS	27.4	56.17	2007-322-05-40-12	-22.64	-66.32	262	128	246	SKKSac	5-20s	0.98	25	41	0.92	1.24	7.75	3.06	fair
BI.BNDS	27.4	56.17	2007-322-05-40-12	-22.64	-66.32	262	128	246	SKSac	5-20s	0.98	40	29	0.48	0.42	8.17	4.29	fair
BI.BNDS	27.4	56.17	2007-323-00-52-12	-21.18	-178.75	96	130	558	PKSbc	5-20s	1	-3	8	1.72	0.98	16.45	5.08	fair
BI.BNDS	27.4	56.17	2007-324-17-55-51	-22.92	-70.48	263	132	15	PKSbc	5-20s	0.95	39	23	0.66	0.44	5.39	3.32	fair
BI.BNDS	27.4	56.17	2007-324-17-55-51	-22.92	-70.48	263	132	15	SKSac	5-20s	0.97	13	17	1.6	0.88	11.51	2.74	fair
BI.BNDS	27.4	56.17	2007-331-11-49-58	-10.95	162.15	93	109	16	SKSac	5-20s	Null	Null	Null	Null	Null	9.7	4.87	goodNull
BI.BNDS	27.4	56.17	2007-343-07-28-20	-26	-177.51	101	132	153	PKSbc	5-20s	0.92	-8	12	1.13	0.56	-0.43	0	fair
BI.BNDS	27.4	56.17	2007-347-07-23-39	-23.2	-70.55	263	132	16	PKSbc	5-20s	0.97	42	26	0.68	0.7	7.78	3.38	fair
BI.BNDS	27.4	56.17	2007-350-08-09-17	-22.95	-70.18	263	132	45	SKKSac	5-20s	Null	Null	Null	Null	Null	9.78	5.2	goodNull
BI.BNDS	27.4	56.17	2007-350-08-09-17	-22.95	-70.18	263	132	45	SKSac	5-20s	0.98	44	42	0.96	1.87	6.69	2.56	fair
BI.BNDS	27.4	56.17	2007-354-07-55-15	-39.01	178.29	119	131	20	SKSac	5-20s	Null	Null	Null	Null	Null	8.67	5.45	goodNull
BI.BNDS	27.4	56.17	2008-072-11-23-34	-16.57	167.34	96	116	13	SKSac	5-20s	Null	Null	Null	Null	Null	-0.43	0	fairNull
BI.BNDS	27.4	56.17	2008-078-08-22-47	-29.25	-177.44	105	133	25	PKSbc	5-20s	0.96	-12	62	0.66	2.66	6.97	4.46	fair
BI.BNDS	27.4	56.17	2008-084-20-39-07	-20.04	-68.96	266	130	120	SKKSac	5-20s	0.99	33	31	0.72	0.56	7.95	3.72	fair
BI.BNDS	27.4	56.17	2008-084-20-39-07	-20.04	-68.96	266	130	120	SKSac	5-20s	Null	Null	Null	Null	Null	5.99	6.71	goodNull
BI.BNDS	27.4	56.17	2008-239-21-00-36	-7.64	-74.38	283	129	154	SKKSac	5-20s	0.99	52	44	0.36	2.83	10.03	6.95	fair
BI.BNDS	27.4	56.17	2008-239-21-00-36	-7.64	-74.38	283	129	154	SKSac	5-20s	0.97	47	23	0.3	0.32	4.41	4.02	fair
BI.BNDS	27.4	56.17	2008-245-04-00-39	-25.39	-177.64	100	132	171	SKSac	5-20s	0.96	-44	50	1.6	0.86	5.3	1.57	fair
BI.BNDS	27.4	56.17	2008-252-03-03-15	-19.96	169.11	99	119	36	SKKSac	5-20s	Null	Null	Null	Null	Null	13.04	8.84	goodNull
BI.BNDS	27.4	56.17	2008-254-13-08-14	8.09	-38.7	279	91	9	SKSac	5-20s	0.97	29	52	0.98	1.49	9.72	4.45	fair
BI.BNDS	27.4	56.17	2008-286-20-55-41	-20.12	-64.97	264	126	352	SKSac	5-20s	0.98	39	23	0.26	0.22	10.55	6.53	fair
BI.BNDS	27.4	56.17	2008-309-18-35-45	-17.14	168.46	96	117	205	SKSac	5-20s	0.98	-7	17	1.52	1	11.3	4.42	fair
BI.BNDS	27.4	56.17	2009-089-07-13-07	56.55	-152.74	16	93	21	SKSac	5-20s	0.98	-5	68	0.46	2.16	12	7.02	fair
BI.BNDS	27.4	56.17	2009-107-02-08-08	-19.58	-70.48	267	131	25	PKSbc	5-20s	0.98	38	31	0.44	0.7	6.04	4.05	fair
BI.BNDS	27.4	56.17	2009-146-00-49-39	-21.01	-177.02	95	131	35	PKSbc	5-20s	0.91	-12	15	0.82	0.56	-0.43	0	fair
BI.BNDS	27.4	56.17	2009-153-02-17-03	-17.76	167.95	97	117	15	SKKSac	5-20s	0.91	-47	34	1.1	0.99	7.39	2.51	fair
BI.BNDS	27.4	56.17	2009-153-02-17-03	-17.76	167.95	97	117	15	SKSac	5-20s	Null	Null	Null	Null	Null	11.7	5.12	goodNull
BI.BNDS	27.4	56.17	2009-163-09-44-15	-17.61	167.81	97	117	15	SKKSac	5-20s	0.96	-11	71	0.88	3.14	8.24	4.53	fair
BI.BNDS	27.4	56.17	2009-245-18-00-09	-29.39	-178.96	106	132	257	SKKSac	5-20s	0.95	-36	24	0.38	0.42	5.37	4.2	fair
BI.BNDS	27.4	56.17	2009-300-00-04-46	-59.95	-65.16	214	129	10	PKSdf	5-20s	0.96	59	21	1.2	0.63	10.45	2.55	fair
BI.BNDS	27.4	56.17	2009-317-03-05-57	-19.39	-70.32	267	131	27	PKSbc	5-20s	0.98	40	26	0.4	0.36	9.99	5.58	fair
BI.BNDS	27.4	56.17	2009-318-19-44-29	-22.96	-66.64	261	128	220	SKKSac	5-20s	0.94	15	21	0.92	0.62	-0.43	0	fair
BI.BNDS	27.4	56.17	2009-318-19-44-29	-22.96	-66.64	261	128	220	SKSac	5-20s	0.97	31	46	0.52	1.88	7.76	4.16	fair
BI.BNDS	27.4	56.17	2009-326-07-48-20	-17.79	-178.43	91	129	522	PKSbc	5-20s	0.98	-14	71	0.82	2.09	7.5	4.87	fair
BI.BNDS	27.4	56.17	2010-040-01-03-44	-15.05	-173.49	86	132	10	SKKSac	5-20s	Null	Null	Null	Null	Null	11.11	4.46	goodNull
BI.BNDS	27.4	56.17	2010-040-01-03-44	-15.05	-173.49	86	132	10	SKSac	5-20s	0.93	35	36	1.22	1.44	6.39	2.61	fair
BI.BNDS	27.4	56.17	2010-044-02-34-28	-21.9	-174.77	95	134	11	PKSbc	5-20s	0.93	-10	11	1.13	0.67	-0.43	0	fair
BI.BNDS	27.4	56.17	2010-063-22-39-26	-22.23	-68.33	263	130	114	SKKSac	5-20s	0.99	43	33	0.6	0.98	5.09	3.44	good
BI.BNDS	27.4	56.17	2010-063-22-39-26	-22.23	-68.33	263	130	114	SKSac	5-20s	0.95	57	56	1.22	2.47	5.52	2.63	fair
BI.BNDS	27.4	56.17	2010-075-02-21-57	-36.22	-73.26	245	137	18	PKSbc	5-20s	0.96	17	17	0.7	0.34	6.32	4.48	fair
BI.BNDS	27.4	56.17	2010-079-14-00-49	-3.36	152.25	90	97	414	SKSac	5-20s	Null	Null	Null	Null	Null	7.21	8.55	goodNull
BI.BNDS	27.4	56.17	2010-107-23-15-22	-6.67	147.29	95	94	53	SKSac	5-20s	0.99	-36	41	0.44	0.93	20.21	6.23	good
BI.BNDS	27.4	56.17	2010-126-02-42-47	-18.06	-70.55	269	130	37	PKSbc	5-20s	0.9	22	14	0.82	0.46	-0.43	0	fair
BI.BNDS	27.4	56.17	2010-143-22-46-52	-13.93	-74.35	276	132	101	PKSbc	5-20s	0.99	14	37	1.2	1.28	13.91	6.58	fair
BI.BNDS	27.4	56.17	2010-147-17-14-46	-13.7	166.64	93	114	31	SKKSac	5-20s	0.98	-53	27	0.26	0.42	4.86	4.62	fair
BI.BNDS	27.4	56.17	2010-177-05-30-19	-10.63	161.45	93	108	35	SKKSac	5-20s	Null	Null	Null	Null	Null	8.65	4.66	goodNull
BI.BNDS	27.4	56.17	2010-181-04-31-02	-23.31	179.12	99	129	581	PKSbc	5-20s	0.99	-1	9	1.5	0.83	19.97	5.42	fair
BI.BNDS	27.4	56.17	2010-193-00-11-21	-22.15	-68.22	263	130	115	SKKSac	5-20s	0.97	45	23	1.08	0.36	12.52	2.65	good
BI.BNDS	27.4	56.17	2010-199-13-04-09	-5.97	150.43	93	96	28	SKSac	5-20s	0.94	-12	34	0.51	0.62	-0.43	0	fair
BI.BNDS	27.4	56.17	2010-224-11-54-15	-1.27	-77.31	292	128	206	SKKSac	5-20s	0.97	73	22	0.74	0.5	5	3.87	fair
BI.BNDS	27.4	56.17	2010-246-16-35-47	-43.52	171.83	125	126	12	SKKSac	5-20s	0.98	19	19	1.58	0.85	15.29	3.51	fair
BI.BNDS	27.4	56.17	2010-327-09-01-06	-5.96	148.97	94	95	68	SKSac	5-20s	0.99	-8	76	1.02	2.09	12.33	6.27	fair
BI.BNDS	27.4	56.17	2011-005-06-46-14	-22.26	171.63	100	122	112	SKSac	5-20s	0.97	-31	33	1.08	0.58	7.13	2.21	good
BI.BNDS	27.4	56.17	2011-013-16-16-41	-20.63	168.47	100	118	9	SKKSac	5-20s	0.96	0	73	1.76	2.26	7.32	3.83	fair
BI.BNDS	27.4	56.17	2011-038-19-53-42	-7.15	155.18	92	101	415	SKSac	5-20s	Null	Null	Null	Null	Null	17.85	8.26	goodNull
BI.BNDS	27.4	56.17	2011-045-03-40-09	-35.38	-72.83	246	136	21	PKSbc	5-20s	0.98	20	18	0.6	0.32	8.37	5.65	fair
BI.BNDS	27.4	56.17	2011-052-10-57-52	-26.14	178.39	103	129	558	SKKSac	5-20s	0.99	-31	30	0.34	0.44	12.11	6.33	good
BI.BNDS	27.4	56.17	2011-065-12-31-59	-18.02	-69.36	269	129	118	SKKSac	5-20s	0.97	34	28	0.3	0.44	5.89	4.93	fair
BI.BNDS	27.4	56.17	2011-065-12-31-59	-18.02	-69.36	269	129	118	SKSac	5-20s	0.98	51	31	0.42	0.54	5.86	4.3	fair
BI.BNDS	27.4	56.17	2011-065-14-32-36	-56.42	-27.06	216	109	87	SKSac	5-20s	0.97	82	30	0.22	0.64	8.75	6.82	fair
BI.BNDS	27.4	56.17	2011-093-14-07-09	-17.64	-178.59	91	129	551	PKSbc	5-20s	0.94	-10	70	1.46	1.99	6.39	3.83	fair
BI.BNDS	27.4	56.17	2011-097-13-11-22	17.21	-94.34	324	127	166	SKKSac	5-20s	0.96	-3	23	0.36	0.46	3.85	3.56	fair
BI.BNDS	27.4	56.17	2011-097-13-11-22	17.21	-94.34	324	127	166	SKSac	5-20s	Null	Null	Null	Null	Null	9.31	4.06	goodNull
BI.BNDS	27.4	56.17	2011-113-04-16-54	-10.38	161.2	93	108	79	SKSdf	5-20s	0.94	-44	17	0.5	0.34	5.23	4.12	fair
BI.BNDS	27.4	56.17	2011-120-08-19-16	6.85	-82.33	304	127	12	SKKSac	5-20s	0.94	0	41	0.72	1.34	4.66	2.76	fair
BI.BNDS	27.4	56.17	2011-167-00-03-35	-5.93	151.04	93	97	16	SKSac	5-20s	0.97	-5	38	2.08	1.76	10.14	4.6	fair
BI.BNDS	27.4	56.17	2011-171-16-36-01	-21.7	-68.23	264	129	128	SKSac	5-20s	0.96	47	28	0.58	0.52	5.28	3.52	fair
BI.BNDS	27.4	56.17	2011-187-19-03-18	-29.54	-176.34	106	134	17	PKSbc	5-20s	0.95	5	32	1.13	1.23	-0.43	0	fair
BI.BNDS	27.4	56.17	2011-192-07-15-43	-29.49	-176.58	106	134	11	PKSbc	5-20s	0.91	6	27	1.44	1.54	-0.43	0	fair
BI.BNDS	27.4	56.17	2011-197-07-03-32	-22.43	-175	96	134	6	PKSbc	5-20s	0.95	-10	9	1.23	0.67	-0.43	0	fair
BI.BNDS	27.4	56.17	2011-234-09-38-37	-29.03	-176.68	105	134	10	PKSbc	5-20s	0.92	-8	12	0.72	0.31	-0.43	0	fair
BI.BNDS	27.4	56.17	2011-236-17-46-11	-7.64	-74.53	283	129	147	SKSac	5-20s	0.97	71	23	1.22	0.59	16.88	3.03	fair
BI.BNDS	27.4	56.17	2011-246-04-48-57	-56.45	-26.85	216	109	84	SKSac	5-20s	Null	Null	Null	Null	Null	19.84	11.6	goodNull
BI.BNDS	27.4	56.17	2011-248-09-52-01	-15.29	-173.62	86	132	37	PKSbc	5-20s	0.9	-18	7	1.33	0.62	-0.43	0	fair
BI.BNDS	27.4	56.17	2011-280-08-58-28	-32.51	-179.04	110	132	36	PKSbc	5-20s	0.98	14	15	1.84	2.18	9.26	5.96	fair
BI.BNDS	27.4	56.17	2011-341-22-23-09	-27.9	-70.92	256	133	20	PKSbc	5-20s	0.98	31	27	0.31	0.3	11.12	7.95	good
BI.BNDS	27.4	56.17	2011-341-22-23-09	-27.9	-70.92	256	133	20	SKSac	5-20s	0.97	22	37	0.78	0.8	5.06	2.53	fair
BI.BNDS	27.4	56.17	2011-348-05-04-58	-7.55	146.81	96	94	135	SKSac	5-20s	Null	Null	Null	Null	Null	18.09	9.88	goodNull
BI.BNDS	27.4	56.17	2012-009-04-07-14	-10.62	165.16	91	112	28	SKKSac	5-20s	0.98	77	5	2.26	0.26	41.02	2.96	fair
BI.BNDS	27.4	56.17	2012-022-05-53-42	-56.76	-25.15	215	108	13	SKSac	5-20s	Null	Null	Null	Null	Null	9.74	7.99	goodNull
BI.BNDS	27.4	56.17	2012-024-00-52-05	-24.98	178.52	101	129	580	PKSbc	5-20s	0.99	-10	34	1.06	0.93	12.05	3.52	fair
BI.BNDS	27.4	56.17	2012-034-03-46-21	-17.38	167.28	97	116	8	SKSac	5-20s	0.93	-3	8	1.54	0.92	-0.43	0	fair
BI.BNDS	27.4	56.17	2012-069-07-09-50	-19.12	169.61	98	119	16	SKKSac	5-20s	0.99	-13	63	0.68	1.63	10.61	4.98	fair
BI.BNDS	27.4	56.17	2012-081-22-15-06	-6.24	145.96	96	93	118	SKSac	5-20s	Null	Null	Null	Null	Null	12.94	9.46	goodNull
BI.BNDS	27.4	56.17	2012-103-07-15-48	28.7	-113.1	349	123	13	SKKSac	5-20s	0.98	45	45	0.38	1.67	14.03	6.74	fair
BI.BNDS	27.4	56.17	2012-114-17-36-21	-28.56	-177.41	105	133	114	SKKSac	5-20s	Null	Null	Null	Null	Null	9.75	10.1	goodNull
BI.BNDS	27.4	56.17	2012-149-05-07-23	-28.04	-63.09	254	127	586	SKSac	5-20s	0.98	25	37	0.74	0.51	10.31	4.29	fair
BI.BNDS	27.4	56.17	2012-159-16-03-18	-15.88	-72.41	273	131	110	PKSbc	5-20s	0.99	25	29	0.72	0.56	18.28	4.4	fair
BI.BNDS	27.4	56.17	2012-159-16-03-18	-15.88	-72.41	273	131	110	SKKSac	5-20s	0.96	14	30	1.56	1.28	9.07	4.27	fair
BI.BNDS	27.4	56.17	2012-207-11-20-27	-9.69	159.73	93	106	20	SKSac	5-20s	Null	Null	Null	Null	Null	14.89	8.68	goodNull
BI.BNDS	27.4	56.17	2012-215-09-56-41	-4.65	153.28	91	98	46	SKSac	5-20s	Null	Null	Null	Null	Null	13.6	4.77	goodNull
BI.BNDS	27.4	56.17	2012-298-00-45-32	10.09	-85.3	310	127	17	SKSac	5-20s	0.95	-15	24	0.6	0.54	4.34	3.15	fair
BI.BNDS	27.4	56.17	2013-188-20-30-06	-6.03	149.71	94	96	56	SKSac	5-20s	0.96	-10	39	0.62	1.13	-0.43	0	fair
BI.BNDS	27.4	56.17	2013-248-04-01-36	15.18	-45.23	289	93	10	SKKSac	5-20s	0.97	65	29	0.88	2.17	6.25	3.49	fair
BI.BNDS	27.4	56.17	2013-284-21-25-00	-30.66	-178.48	108	132	151	PKSbc	5-20s	0.95	-7	28	0.72	0.67	-0.43	0	fair
BI.BNDS	27.4	56.17	2014-033-09-26-37	-32.91	-177.88	111	133	44	PKSbc	5-20s	0.92	-7	27	0.82	0.67	-0.43	0	fair
BI.BNDS	27.4	56.17	2014-185-15-00-27	-6.23	152.81	93	99	20	SKSac	5-20s	Null	Null	Null	Null	Null	10.26	7.51	goodNull
BI.BNDS	27.4	56.17	2014-202-14-54-41	-19.8	-178.4	94	130	615	SKKSac	5-20s	0.99	-25	47	0.56	1.01	16.98	5.29	fair
BI.BNDS	27.4	56.17	2014-202-14-54-41	-19.8	-178.4	94	130	615	SKSac	5-20s	0.99	-2	9	1.48	0.85	50.43	9.85	fair
BI.BNDS	27.4	56.17	2014-235-22-32-23	-32.7	-71.44	250	135	32	PKSbc	5-20s	0.98	23	20	0.46	0.22	9.6	5.6	fair
BI.BNDS	27.4	56.17	2014-235-22-32-23	-32.7	-71.44	250	135	32	SKKSac	5-20s	0.99	26	29	0.92	0.46	6.57	2.43	fair
BI.BNDS	27.4	56.17	2014-236-23-21-45	-14.6	-73.57	275	132	101	PKSbc	5-20s	1	28	44	0.48	0.72	19.93	6.8	fair
BI.BNDS	27.4	56.17	2014-236-23-21-45	-14.6	-73.57	275	132	101	SKKSac	5-20s	0.99	43	46	0.42	1.79	10.86	5.96	fair
BI.BNDS	27.4	56.17	2014-267-11-16-15	-23.8	-66.63	260	129	224	SKKSac	5-20s	0.97	38	21	0.4	0.24	7.73	4.99	fair
BI.BNDS	27.4	56.17	2014-287-03-51-34	12.53	-88.12	314	127	40	SKSac	5-20s	0.98	2	29	0.38	0.38	7.75	5.08	fair
BI.BNDS	27.4	56.17	2015-023-03-47-27	-17.03	168.52	96	117	220	SKSac	5-20s	0.94	-6	7	1.54	0.77	-0.43	0	fair
BI.BNDS	27.4	56.17	2015-042-18-57-22	-23.11	-66.69	261	129	223	SKKSac	5-20s	0.96	20	19	0.9	0.48	25.53	3.68	fair
BI.BNDS	27.4	56.17	2015-042-18-57-22	-23.11	-66.69	261	129	223	SKSac	5-20s	0.97	41	26	0.36	0.36	6.17	4.83	fair
BI.BNDS	27.4	56.17	2015-118-16-39-39	-20.89	-178.63	95	130	581	PKSbc	5-20s	1	-4	19	1.46	1.3	14.17	5.42	fair
BI.BNDS	27.4	56.17	2015-120-10-45-02	-5.38	151.77	92	97	31	SKSac	5-20s	0.93	-6	5	2.05	1.18	-0.43	0	fair
BI.BNDS	27.4	56.17	2015-121-08-06-03	-5.2	151.78	92	97	44	SKSac	5-20s	Null	Null	Null	Null	Null	6.86	6.23	goodNull
BI.BNDS	27.4	56.17	2015-127-07-10-19	-7.22	154.56	93	101	10	SKSac	5-20s	0.93	-6	6	1.95	1.23	-0.43	0	fair
BI.BNDS	27.4	56.17	2015-140-00-30-54	-19.3	-175.52	92	132	203	SKKSac	5-20s	0.94	-40	24	0.7	0.36	5.32	2.82	fair
BI.BNDS	27.4	56.17	2015-140-00-30-54	-19.3	-175.52	92	132	203	SKSac	5-20s	0.91	-18	27	1	0.78	2.69	2	fair
BI.BNDS	27.4	56.17	2015-172-21-28-16	-20.43	-178.33	94	130	562	PKSbc	5-20s	0.97	-3	20	1.88	1.56	9.05	5.38	fair
BI.BNDS	27.4	56.17	2015-191-04-12-42	-9.31	158.4	93	105	12	SKSac	5-20s	0.96	-12	59	1.4	2.26	8.72	4.21	fair
BI.BNDS	27.4	56.17	2015-331-21-00-22	-24.83	-70.6	260	132	34	PKSbc	5-20s	0.96	17	21	0.51	0.36	-0.43	0	good
BI.BSRN	31.97	59.13	2012-312-16-35-46	13.99	-91.89	324	127	24	SKKSac	5-20s	Null	Null	Null	Null	Null	7.02	8.15	goodNull
BI.BSRN	31.97	59.13	2013-188-20-30-06	-6.03	149.71	95	94	56	SKSac	5-20s	Null	Null	Null	Null	Null	12.63	5.34	goodNull
BI.BSRN	31.97	59.13	2013-198-02-37-43	-15.66	-71.74	278	133	7	SKKSac	5-20s	0.96	-32	22	0.82	0.48	4.79	2.84	fair
BI.BSRN	31.97	59.13	2013-198-02-37-43	-15.66	-71.74	278	133	7	SKSac	5-20s	0.92	-27	28	1.08	0.62	3.69	2.09	fair
BI.BSRN	31.97	59.13	2013-273-05-55-55	-30.93	-178.32	105	131	41	PKSbc	5-20s	0.99	-22	30	0.54	0.4	7.7	5.54	fair
BI.BSRN	31.97	59.13	2013-304-23-03-59	-30.29	-71.52	259	138	27	PKSbc	4-25s	0.93	9	26	0.72	0.67	-6.3	0	fair
BI.BSRN	31.97	59.13	2014-033-09-26-37	-32.91	-177.88	107	132	44	SKKSac	5-20s	1	-19	25	0.42	0.32	7.82	4.7	fair
BI.BSRN	31.97	59.13	2014-180-07-52-55	-55.47	-28.37	219	114	8	SKKSac	4-25s	0.95	-6	35	0.62	0.72	-6.3	0	fair
BI.BSRN	31.97	59.13	2014-180-07-52-55	-55.47	-28.37	219	114	8	SKSac	5-20s	0.96	-16	37	1.06	1.29	11.78	3.84	fair
BI.BSRN	31.97	59.13	2014-188-11-23-54	14.72	-92.46	325	126	53	SKKSac	5-20s	Null	Null	Null	Null	Null	6.35	4.34	fairNull
BI.BSRN	31.97	59.13	2014-235-22-32-23	-32.7	-71.44	255	139	32	PKSbc	5-20s	0.98	5	45	0.84	0.63	7.33	4.26	fair
BI.BSRN	31.97	59.13	2014-247-05-33-50	-21.39	-173.32	91	132	35	PKSbc	5-20s	1	5	4	1.96	0.61	44.51	8.31	fair
BI.BSRN	31.97	59.13	2014-320-22-33-20	-37.65	179.66	114	132	22	SKKSac	4-25s	0.94	-37	41	1.03	1.95	-6.3	0	fair
BI.BSRN	31.97	59.13	2015-023-03-47-27	-17.03	168.52	95	115	219	SKSac	5-20s	Null	Null	Null	Null	Null	11.84	6.69	goodNull
BI.BSRN	31.97	59.13	2015-042-18-57-22	-23.11	-66.69	266	132	223	SKKSac	5-20s	Null	Null	Null	Null	Null	15.08	9.29	goodNull
BI.BSRN	31.97	59.13	2015-047-22-00-53	-55.52	-28.26	219	114	13	SKKSac	5-20s	1	-9	30	0.4	0.42	8.64	6.6	fair
BI.BSRN	31.97	59.13	2015-077-18-27-29	-36.12	-73.52	251	141	13	SKKSac	5-20s	Null	Null	Null	Null	Null	9.53	5.82	goodNull
BI.BSRN	31.97	59.13	2015-114-13-56-15	51.61	-130.77	6	96	8	SKSac	4-25s	0.91	-5	22	1.74	1.54	-6.3	0	fair
BI.BSRN	31.97	59.13	2015-120-10-45-02	-5.38	151.77	93	95	31	SKSac	5-20s	Null	Null	Null	Null	Null	7.95	8.07	goodNull
BI.BSRN	31.97	59.13	2015-142-21-45-19	-11.06	163.7	92	108	11	SKSac	5-20s	0.97	-23	45	1.82	1.12	6.43	2.19	fair
BI.BSRN	31.97	59.13	2015-222-04-12-15	-9.34	158.05	93	102	22	SKSac	4-25s	Null	Null	Null	Null	Null	-6.3	0	fairNull
BI.BSRN	31.97	59.13	2015-224-18-49-24	-9.33	157.88	93	102	6	SKSac	4-25s	Null	Null	Null	Null	Null	-6.3	0	fairNull
BI.BSRN	31.97	59.13	2015-227-07-47-06	-10.9	163.82	92	108	8	SKSac	5-20s	0.97	-40	41	0.22	1.66	7.76	5.61	fair
BI.BSRN	31.97	59.13	2015-260-03-55-15	-31.42	-71.69	257	138	27	PKSbc	5-20s	0.98	-4	33	1.9	2.12	6.77	4.21	fair
BI.BSRN	31.97	59.13	2015-264-05-39-34	-31.58	-71.74	257	139	30	PKSbc	5-20s	0.97	2	67	0.98	0.86	6.67	4.09	fair
BI.BSRN	31.97	59.13	2015-264-17-40-00	-31.73	-71.38	257	138	35	PKSbc	5-20s	0.98	19	32	0.7	0.61	10.53	3.58	fair
BI.BSRN	31.97	59.13	2015-265-07-13-00	-31.44	-71.27	257	138	58	PKSbc	5-20s	0.98	17	43	0.64	0.83	9.84	3.91	fair
BI.BSRN	31.97	59.13	2015-269-02-51-18	-30.81	-71.32	258	138	46	PKSbc	5-20s	0.99	13	53	0.58	0.83	12.58	4.96	fair
BI.BSRN	31.97	59.13	2015-293-21-52-02	-14.86	167.3	94	113	135	SKSac	5-20s	0.97	-37	30	0.3	0.44	10.22	5.66	fair
BI.BSRN	31.97	59.13	2015-311-07-31-43	-30.88	-71.45	258	138	46	PKSbc	5-20s	0.99	17	52	0.44	0.68	18.04	6.45	good
BI.BSRN	31.97	59.13	2015-315-01-54-38	-29.51	-72.01	260	138	12	SKKSac	5-20s	0.99	4	57	1.68	1.14	6.36	3.21	fair
BI.BSRN	31.97	59.13	2015-322-18-31-04	-8.9	158.42	93	103	12	SKSac	5-20s	1	-33	33	0.42	0.56	8.11	6.01	fair
BI.BSRN	31.97	59.13	2016-041-00-33-05	-30.57	-71.58	258	138	29	PKSbc	5-20s	0.99	-2	65	1.2	1.74	11.31	5.62	fair
BI.BSRN	31.97	59.13	2016-110-05-25-39	-55.73	-27.23	218	114	14	SKKSac	5-20s	0.99	-17	38	0.6	1.34	14	5.75	fair
BI.BSRN	31.97	59.13	2016-111-08-33-47	0.64	-80.21	302	130	14	SKSac	5-20s	0.95	0	40	0.8	0.86	4.15	2.2	fair
BI.BSRN	31.97	59.13	2016-166-13-49-22	-18.76	168.83	97	116	111	SKSac	4-25s	Null	Null	Null	Null	Null	-6.3	0	fairNull
BI.BSRN	31.97	59.13	2016-234-03-45-23	-55.31	-31.75	220	116	12	SKKSac	4-25s	0.94	-18	26	0.41	0.36	-6.3	0	fair
BI.CHBR	25.6	60.48	2009-313-10-44-55	-17.24	178.33	95	122	595	SKSac	5-20s	0.97	-4	11	1.84	1.24	15.11	4.96	fair
BI.CHBR	25.6	60.48	2009-321-15-30-47	52.12	-131.4	7	102	17	SKSac	5-20s	0.96	-64	44	1.12	1.2	11.63	4	fair
BI.CHBR	25.6	60.48	2010-009-05-51-30	-9.13	157.63	95	100	12	SKSac	5-20s	0.97	-16	69	0.74	2.97	10.93	5.59	fair
BI.CHBR	25.6	60.48	2010-063-22-39-26	-22.23	-68.33	263	133	114	SKKSac	5-20s	0.97	10	31	0.78	0.42	2.79	2.24	fair
BI.CHBR	25.6	60.48	2010-079-14-00-49	-3.36	152.25	92	93	414	SKSac	5-20s	Null	Null	Null	Null	Null	9.88	11.24	goodNull
BI.CHBR	25.6	60.48	2010-144-16-18-29	-8.09	-71.56	282	131	581	PKSbc	5-20s	0.98	-59	66	0.62	2.07	9.62	5.47	fair
BI.CHBR	25.6	60.48	2010-152-03-26-15	9.33	-84.21	311	131	18	PKSbc	5-20s	0.96	11	14	1.02	0.67	6.91	2.66	fair
BI.CHBR	25.6	60.48	2011-001-09-56-58	-26.8	-63.14	256	130	576	PKSbc	5-20s	0.97	29	32	0.76	0.61	7.58	2.59	fair
BI.CHBR	25.6	60.48	2011-013-16-16-41	-20.63	168.47	102	114	9	SKKSac	5-20s	0.96	-45	56	0.72	2.94	3.38	2.65	fair
BI.CHBR	25.6	60.48	2011-038-19-53-42	-7.15	155.18	94	97	415	SKSac	5-20s	Null	Null	Null	Null	Null	22.05	13.77	goodNull
BI.CHBR	25.6	60.48	2011-052-10-57-52	-26.14	178.39	105	125	558	SKSac	5-20s	0.96	-30	31	0.52	0.86	7.69	4.09	fair
BI.CHBR	25.6	60.48	2011-065-14-32-36	-56.42	-27.06	216	110	87	SKKSac	5-20s	0.96	16	17	0.98	1.18	8.99	4.19	fair
BI.CHBR	25.6	60.48	2011-065-14-32-36	-56.42	-27.06	216	110	87	SKSac	5-20s	Null	Null	Null	Null	Null	6.95	6.64	goodNull
BI.CHBR	25.6	60.48	2011-097-13-11-22	17.21	-94.34	327	131	166	SKKSac	5-20s	0.93	22	24	0.9	0.52	4.09	2.63	fair
BI.CHBR	25.6	60.48	2011-097-13-11-22	17.21	-94.34	327	131	166	SKSdf	5-20s	0.9	12	26	0.96	0.94	4.23	2.67	fair
BI.CHBR	25.6	60.48	2011-187-19-03-18	-29.54	-176.34	108	130	17	PKSdf	5-20s	0.99	-33	33	0.26	0.5	8.24	7.55	good
BI.CHBR	25.6	60.48	2011-236-17-46-11	-7.64	-74.53	285	134	147	SKKSac	5-20s	0.99	-31	33	0.44	0.92	9.91	5.85	fair
BI.CHBR	25.6	60.48	2011-245-13-47-09	-28.4	-63.03	253	130	578	PKSbc	5-20s	0.97	10	37	0.8	0.65	10.21	3.31	fair
BI.CHBR	25.6	60.48	2011-252-19-41-34	49.53	-126.89	5	105	22	SKSac	5-20s	0.98	-65	48	0.86	1.04	9.68	3.87	fair
BI.CHBR	25.6	60.48	2011-345-01-47-25	17.99	-99.79	334	133	59	PKSbc	5-20s	0.93	23	24	0.5	0.4	4.69	3.35	fair
BI.CHBR	25.6	60.48	2012-021-18-47-11	14.87	-93	324	132	45	SKKSac	5-20s	Null	Null	Null	Null	Null	14.45	8.15	goodNull
BI.CHBR	25.6	60.48	2012-022-05-53-42	-56.76	-25.15	215	109	13	SKSac	5-20s	0.96	-18	28	1.52	0.58	4.41	1.75	fair
BI.CHBR	25.6	60.48	2012-093-17-36-42	16.39	-98.32	331	133	9	SKSac	5-20s	0.96	20	35	0.6	1.4	6.61	3.84	fair
BI.CHBR	25.6	60.48	2012-105-10-56-19	-57.68	-65.31	215	130	15	PKSbc	5-20s	1	7	11	0.94	0.52	18.7	3.34	good
BI.CHBR	25.6	60.48	2012-122-22-43-33	14.38	-92.9	324	133	14	PKSbc	5-20s	0.98	18	32	0.38	1.54	10	6.63	fair
BI.CHBR	25.6	60.48	2012-149-05-07-23	-28.04	-63.09	254	130	586	PKSbc	5-20s	0.98	22	34	0.82	0.73	8.28	2.85	good
BI.CHBR	25.6	60.48	2012-223-18-37-43	52.63	-167.42	27	92	13	SKKSac	5-20s	Null	Null	Null	Null	Null	8.11	11.17	goodNull
BI.CHBR	25.6	60.48	2012-223-18-37-43	52.63	-167.42	27	92	13	SKSac	5-20s	Null	Null	Null	Null	Null	20.79	7.64	goodNull
BI.CHBR	25.6	60.48	2012-249-14-42-07	10.09	-85.31	312	131	35	PKSbc	5-20s	0.94	-4	22	0.52	0.23	20.43	4.89	fair
BI.CHBR	25.6	60.48	2012-298-00-45-32	10.09	-85.3	312	131	17	PKSbc	5-20s	0.97	7	28	0.64	1.51	8.18	4.73	fair
BI.CHBR	25.6	60.48	2012-312-16-35-46	13.99	-91.89	322	132	24	PKSbc	5-20s	0.96	9	37	0.64	1.56	8.81	4.83	fair
BI.CHBR	25.6	60.48	2012-315-14-57-50	-8.87	-75.07	283	135	129	PKSbc	5-20s	0.96	-37	21	0.54	0.32	5.95	3.95	fair
BI.CHBR	25.6	60.48	2012-316-22-14-59	14.13	-92.16	323	132	20	PKSab	5-20s	0.95	6	21	0.52	0.46	6.86	4.55	fair
BI.CHBR	25.6	60.48	2012-317-20-42-14	57.79	-142.85	12	95	9	SKSac	5-20s	Null	Null	Null	Null	Null	12.11	6.07	goodNull
BI.CHBR	25.6	60.48	2012-320-09-20-21	18.35	-100.38	335	133	53	PKSbc	5-20s	0.93	19	33	0.7	0.7	4.04	2.76	fair
BI.CHBR	25.6	60.48	2013-038-18-59-16	-11	165.66	94	108	11	SKSac	5-20s	0.97	-38	51	0.52	3.5	9.83	5.22	fair
BI.CHBR	25.6	60.48	2013-053-12-01-58	-27.93	-63.1	254	130	575	PKSbc	5-20s	0.97	7	37	0.96	0.69	8.45	3.08	fair
BI.CHBR	25.6	60.48	2013-103-22-49-50	-19.14	169.53	100	115	280	SKSac	5-20s	Null	Null	Null	Null	Null	8.86	4.9	goodNull
BI.CHBR	25.6	60.48	2013-132-07-29-59	13.48	-91.38	322	132	11	PKSbc	5-20s	0.92	14	35	0.72	0.82	-2.11	0	fair
BI.CHBR	25.6	60.48	2013-188-20-30-06	-6.03	149.71	96	92	56	SKSac	5-20s	Null	Null	Null	Null	Null	20	8.71	goodNull
BI.CHBR	25.6	60.48	2013-233-12-38-29	16.88	-99.5	333	133	21	PKSbc	5-20s	0.98	17	31	0.42	0.7	5.94	4.62	fair
BI.CHBR	25.6	60.48	2013-246-20-19-06	51.24	-130.4	7	103	2	SKSac	5-20s	Null	Null	Null	Null	Null	10.8	4.02	goodNull
BI.CHBR	25.6	60.48	2013-327-07-48-32	-17.12	-176.54	93	127	371	SKSac	5-20s	Null	Null	Null	Null	Null	12.52	5.72	goodNull
BI.CHBR	25.6	60.48	2014-038-08-40-13	-15.07	167.37	97	111	122	SKKSac	5-20s	Null	Null	Null	Null	Null	5.81	6.71	goodNull
BI.CHBR	25.6	60.48	2014-038-08-40-13	-15.07	167.37	97	111	122	SKSac	5-20s	0.97	-36	34	0.38	0.64	9.35	5.24	fair
BI.CHBR	25.6	60.48	2014-049-09-27-13	14.67	-58.93	297	109	14	SKKSac	5-20s	0.95	-7	42	1.36	0.96	5.27	2.16	fair
BI.CHBR	25.6	60.48	2014-180-07-52-55	-55.47	-28.37	217	110	8	SKKSac	5-20s	0.98	9	10	1.06	0.21	83.59	5.02	fair
BI.CHBR	25.6	60.48	2014-180-07-52-55	-55.47	-28.37	217	110	8	SKSac	5-20s	Null	Null	Null	Null	Null	4.53	4.55	goodNull
BI.CHBR	25.6	60.48	2014-202-14-54-41	-19.8	-178.4	97	126	615	SKKSac	5-20s	Null	Null	Null	Null	Null	8.3	6.81	goodNull
BI.CHBR	25.6	60.48	2014-202-14-54-41	-19.8	-178.4	97	126	615	SKSac	5-20s	0.95	-12	7	2.18	0.61	13.38	2.01	good
BI.CHBR	25.6	60.48	2014-341-01-22-02	-6.51	154.46	94	96	23	SKSac	5-20s	Null	Null	Null	Null	Null	13.97	6.72	goodNull
BI.CHBR	25.6	60.48	2014-342-08-54-52	7.94	-82.69	308	131	20	PKSbc	5-20s	0.98	-12	21	0.38	0.26	7.29	5.15	fair
BI.CHBR	25.6	60.48	2015-047-22-00-53	-55.52	-28.26	217	110	13	SKKSac	5-20s	0.96	5	12	1.04	0.31	10.11	3.75	fair
BI.CHBR	25.6	60.48	2015-090-12-18-24	-4.89	152.49	94	94	39	SKSac	5-20s	Null	Null	Null	Null	Null	11.33	8.35	goodNull
BI.CHBR	25.6	60.48	2015-120-10-45-02	-5.38	151.77	94	93	31	SKKSac	5-20s	Null	Null	Null	Null	Null	15.26	18.37	goodNull
BI.CHBR	25.6	60.48	2015-120-10-45-02	-5.38	151.77	94	93	31	SKSac	5-20s	Null	Null	Null	Null	Null	8.44	7.59	goodNull
BI.CHBR	25.6	60.48	2015-222-04-12-15	-9.34	158.05	95	101	22	SKKSac	5-20s	0.99	-23	56	0.44	1.33	19.66	6.98	fair
BI.CHBR	25.6	60.48	2015-222-04-12-15	-9.34	158.05	95	101	22	SKSac	5-20s	0.97	13	26	2.04	1.65	12.73	5.07	fair
BI.CHBR	25.6	60.48	2015-224-18-49-24	-9.33	157.88	95	101	6	SKSac	5-20s	Null	Null	Null	Null	Null	19.96	9.67	goodNull
BI.CHBR	25.6	60.48	2015-259-14-03-22	-6.01	151.48	95	93	6	SKSac	5-20s	Null	Null	Null	Null	Null	23.78	11.13	goodNull
BI.CHBR	25.6	60.48	2015-260-04-10-27	-31.52	-71.8	251	138	23	PKSbc	5-20s	0.95	5	8	1.07	0.43	13.53	3.18	fair
BI.CHBR	25.6	60.48	2015-328-22-50-54	-10.06	-71.02	280	132	620	PKSbc	5-20s	0.99	-62	56	0.74	1.13	16.15	5.6	fair
BI.CHBR	25.6	60.48	2015-330-05-45-18	-9.18	-71.26	281	131	602	PKSbc	5-20s	0.99	-29	29	0.58	0.35	18.6	4.35	good
BI.CHBR	25.6	60.48	2015-351-19-49-53	15.8	-93.63	326	132	85	SKKSac	5-20s	0.98	27	27	0.76	1.25	8.99	3.99	fair
BI.CHBR	25.6	60.48	2016-106-14-11-26	13.4	-92.37	323	133	22	PKSbc	5-20s	0.97	6	26	0.54	0.36	5.99	3.89	fair
BI.CHBR	25.6	60.48	2016-110-05-25-39	-55.73	-27.23	217	110	14	SKKSac	5-20s	Null	Null	Null	Null	Null	5.13	4.83	goodNull
BI.CHBR	25.6	60.48	2016-110-05-25-39	-55.73	-27.23	217	110	14	SKSac	5-20s	0.95	0	29	0.82	0.94	4.1	2.98	fair
BI.CHBR	25.6	60.48	2016-173-16-26-34	22.66	-45.13	297	93	10	SKSac	5-20s	0.97	-14	24	0.98	0.4	5.22	2.67	fair
BI.CHTH	35.91	51.13	2005-321-19-26-54	-22.36	-67.89	267	126	147	SKKSac	5-20s	0.98	-20	9	2.02	0.79	11.19	2.53	fair
BI.CHTH	35.91	51.13	2005-321-19-26-54	-22.36	-67.89	267	126	147	SKSac	5-20s	Null	Null	Null	Null	Null	11.64	7.56	goodNull
BI.CHTH	35.91	51.13	2005-357-21-47-28	-1.39	-77.52	294	121	192	SKKSac	5-20s	Null	Null	Null	Null	Null	14.15	6.49	goodNull
BI.CHTH	35.91	51.13	2006-002-06-10-49	-60.96	-21.61	210	113	13	SKKSac	5-20s	0.98	-78	8	2.08	0.61	16.47	2.76	fair
BI.CHTH	35.91	51.13	2006-083-12-27-05	-3.25	143.14	91	94	12	SKSac	5-20s	Null	Null	Null	Null	Null	7.39	3.53	goodNull
BI.CHTH	35.91	51.13	2006-120-19-17-14	-27.02	-71.02	263	130	12	PKSbc	5-20s	0.97	-64	21	0.46	0.36	4.24	3.59	fair
BI.CHTH	35.91	51.13	2006-120-19-17-14	-27.02	-71.02	263	130	12	SKSac	5-20s	0.98	-16	6	2.64	1.14	17.41	3.85	fair
BI.CHTH	35.91	51.13	2006-160-05-58-27	-17.53	-178.75	81	132	564	PKSbc	5-20s	0.99	-24	25	1.32	0.96	14.9	4.19	fair
BI.CHTH	35.91	51.13	2006-232-03-41-48	-61.03	-34.37	214	119	13	SKKSac	5-20s	0.96	-68	70	1.6	1.88	8.83	4.07	fair
BI.CHTH	35.91	51.13	2006-237-00-44-46	-24.4	-67.03	264	126	184	SKSac	5-20s	0.99	-14	17	1.98	1.55	17.38	5.5	fair
BI.CHTH	35.91	51.13	2006-291-10-45-32	-15.05	167.27	87	120	115	SKSac	5-20s	0.97	78	12	1.54	0.42	7.21	4.34	fair
BI.CHTH	35.91	51.13	2007-020-06-21-04	-55.42	-29.53	218	114	10	SKKSac	4-25s	0.91	-70	69	1.44	1.13	2.26	0	fair
BI.CHTH	35.91	51.13	2007-059-23-13-15	-55.24	-29.14	218	114	10	SKKSac	4-25s	0.94	-62	5	1.85	0.77	2.26	0	fair
BI.CHTH	35.91	51.13	2007-059-23-13-15	-55.24	-29.14	218	114	10	SKSac	5-20s	0.98	-61	7	1.9	0.92	15.17	4.94	fair
BI.CHTH	35.91	51.13	2007-092-23-20-23	-8.62	157.39	88	108	18	SKSac	5-20s	0.99	77	26	2.44	1.86	5.89	3.43	fair
BI.CHTH	35.91	51.13	2007-228-08-39-28	-9.83	159.47	87	111	15	SKKSac	5-20s	0.96	-19	23	1.92	1.25	9.9	3.38	fair
BI.CHTH	35.91	51.13	2007-271-01-01-49	-21.21	169.36	92	125	12	SKSac	5-20s	Null	Null	Null	Null	Null	7.67	4.13	fairNull
BI.CHTH	35.91	51.13	2007-273-09-47-51	-49.14	164.11	127	130	18	PKSbc	5-20s	0.98	71	27	0.58	0.44	18.41	4.49	fair
BI.CHTH	35.91	51.13	2007-288-12-29-34	-44.8	167.55	121	132	18	PKSbc	5-20s	0.92	-79	31	1.78	1.04	7.16	3.05	fair
BI.CHTH	35.91	51.13	2007-320-03-13-00	-2.31	-77.84	293	122	122	SKSac	5-20s	Null	Null	Null	Null	Null	10.27	5.43	goodNull
BI.CHTH	35.91	51.13	2007-322-05-40-12	-22.64	-66.32	266	125	246	SKSac	5-20s	0.98	-78	12	1.22	0.55	14.64	4.01	fair
BI.CHTH	35.91	51.13	2007-331-11-49-58	-10.95	162.15	87	113	16	SKSac	5-20s	Null	Null	Null	Null	Null	11.38	6.29	goodNull
BI.CHTH	35.91	51.13	2007-333-19-00-20	14.94	-61.27	295	99	156	SKSac	5-20s	1	34	9	1.66	1.26	13.88	7.54	fair
BI.CHTH	35.91	51.13	2007-350-08-09-17	-22.95	-70.18	267	128	45	SKSac	5-20s	0.93	-15	42	2.14	1.88	7.93	2.99	fair
BI.CHTH	35.91	51.13	2007-354-07-55-15	-39.01	178.29	111	138	20	SKKSac	5-20s	Null	Null	Null	Null	Null	7.01	4.37	fairNull
BI.CHTH	35.91	51.13	2008-043-12-50-18	16.36	-94.3	322	119	83	SKKSac	5-20s	0.97	-27	22	1.86	1.67	9.05	4.2	fair
BI.CHTH	35.91	51.13	2008-084-20-39-07	-20.04	-68.96	270	126	120	SKSac	5-20s	0.99	-9	7	1.92	0.87	21.49	5.28	fair
BI.CHTH	35.91	51.13	2008-119-15-57-55	-58.74	-24.71	213	113	35	SKKSac	5-20s	0.99	79	33	0.46	0.83	20.51	5.9	fair
BI.CHTH	35.91	51.13	2008-285-10-40-14	19.16	-64.83	301	98	23	SKSac	5-20s	Null	Null	Null	Null	Null	24.74	11.56	goodNull
BI.CHTH	35.91	51.13	2009-106-14-57-06	-60.2	-26.86	213	115	20	SKKSac	5-20s	0.98	82	31	0.58	1.36	15.83	5.5	fair
BI.CHTH	35.91	51.13	2009-255-20-06-25	10.71	-67.93	297	106	14	SKSac	5-20s	0.98	37	44	1.3	0.9	6.49	3.79	fair
BI.CHTH	35.91	51.13	2009-288-17-48-21	3.27	-103.82	324	135	10	PKSbc	5-20s	0.94	-60	55	1.14	1.42	8.23	3.33	fair
BI.CHTH	35.91	51.13	2009-318-19-44-29	-22.96	-66.64	266	125	220	SKKSac	5-20s	0.98	-27	50	0.68	1.23	8.34	4.42	fair
BI.CHTH	35.91	51.13	2009-318-19-44-29	-22.96	-66.64	266	125	220	SKSac	5-20s	0.99	-82	18	1.84	1.18	9.07	3.34	fair
BI.CHTH	35.91	51.13	2010-009-05-51-30	-9.13	157.63	88	109	12	SKSac	5-20s	Null	Null	Null	Null	Null	19.07	11.17	goodNull
BI.CHTH	35.91	51.13	2010-036-06-59-05	-47.91	99.59	150	94	1	SKSac	5-20s	0.95	-46	43	1.62	1.22	8.77	3.35	fair
BI.CHTH	35.91	51.13	2010-059-11-25-35	-34.9	-71.62	254	134	46	PKSbc	4-25s	0.93	-76	55	0.41	0.62	2.26	0	fair
BI.CHTH	35.91	51.13	2010-063-14-02-27	-13.57	167.23	86	119	176	SKKSac	5-20s	0.98	75	17	1.8	1.04	14.55	4.11	fair
BI.CHTH	35.91	51.13	2010-063-14-02-27	-13.57	167.23	86	119	176	SKSac	5-20s	Null	Null	Null	Null	Null	11.77	4.73	fairNull
BI.CHTH	35.91	51.13	2010-070-14-39-43	-34.29	-71.89	255	134	11	PKSbc	4-25s	0.9	-77	60	0.41	0.36	2.26	0	fair
BI.CHTH	35.91	51.13	2010-199-13-04-09	-5.97	150.43	89	101	28	SKSac	5-20s	Null	Null	Null	Null	Null	12.59	4.34	goodNull
BI.CHTH	35.91	51.13	2010-224-11-54-15	-1.27	-77.31	294	121	206	SKKSac	5-20s	Null	Null	Null	Null	Null	8.55	9.82	goodNull
BI.CHTH	35.91	51.13	2010-228-19-35-49	-20.8	-178.83	85	134	603	SKKSac	5-20s	0.95	63	33	1.24	0.94	8.54	2.92	fair
BI.CHTH	35.91	51.13	2010-342-05-24-35	-56.41	-25.74	216	113	29	SKKSac	4-25s	0.93	-63	11	1.74	1.38	2.26	0	fair
BI.CHTH	35.91	51.13	2011-113-04-16-54	-10.38	161.2	87	112	79	SKSdf	5-20s	Null	Null	Null	Null	Null	8.71	8.96	goodNull
BI.CHTH	35.91	51.13	2011-171-16-36-01	-21.7	-68.23	268	126	128	SKSac	5-20s	0.96	-87	3	2.06	0.89	14.39	4.96	fair
BI.CHTH	35.91	51.13	2012-080-17-56-18	-3.81	140.27	94	92	66	SKSac	5-20s	0.96	63	42	1.2	1.51	7.22	3.09	fair
BI.CHTH	35.91	51.13	2012-081-22-15-06	-6.24	145.96	92	98	118	SKSac	5-20s	0.96	-12	5	2.38	0.61	17.11	2.8	good
BI.CHTH	35.91	51.13	2012-108-03-50-15	-32.62	-71.36	257	133	29	PKSbc	4-25s	0.92	-70	59	0.51	0.46	2.26	0	fair
BI.CHTH	35.91	51.13	2012-188-02-28-22	-14.66	167.34	87	120	160	SKSac	5-20s	0.97	-11	70	2	2.02	8.3	4.68	fair
BI.CHTH	35.91	51.13	2012-215-09-56-41	-4.65	153.28	87	103	46	SKSac	5-20s	Null	Null	Null	Null	Null	8.06	3.96	goodNull
BI.CHTH	35.91	51.13	2012-319-19-02-06	-29.12	-71.19	261	131	63	SKSac	5-20s	0.98	-41	34	1.24	1.04	8.16	2.78	fair
BI.CHTH	35.91	51.13	2013-116-06-53-28	-28.68	-178.92	95	137	351	SKKSac	5-20s	Null	Null	Null	Null	Null	6.4	4.63	fairNull
BI.CHTH	35.91	51.13	2013-143-17-19-04	-23.01	-177.23	87	136	173	SKKSac	5-20s	0.97	-81	15	0.8	3.12	10.03	6.5	fair
BI.CHTH	35.91	51.13	2013-188-20-30-06	-6.03	149.71	90	100	56	SKSac	5-20s	Null	Null	Null	Null	Null	8.15	3.94	goodNull
BI.CHTH	35.91	51.13	2013-304-23-03-59	-30.29	-71.52	260	132	27	PKSbc	4-25s	0.95	-56	34	0.31	0.41	2.26	0	fair
BI.CHTH	35.91	51.13	2014-180-07-52-55	-55.47	-28.37	218	113	8	SKKSac	4-25s	0.9	-68	68	1.23	0.92	2.26	0	fair
BI.CHTH	35.91	51.13	2014-180-07-52-55	-55.47	-28.37	218	113	8	SKSac	5-20s	0.98	-61	6	2.04	0.78	31.65	6.09	fair
BI.CHTH	35.91	51.13	2014-247-05-33-50	-21.39	-173.32	82	139	35	PKSbc	5-20s	0.98	-18	12	1.84	1.14	10.2	3.62	fair
BI.CHTH	35.91	51.13	2015-023-03-47-27	-17.03	168.52	89	122	219	SKKSac	5-20s	Null	Null	Null	Null	Null	9.44	3.78	goodNull
BI.CHTH	35.91	51.13	2015-023-03-47-27	-17.03	168.52	89	122	219	SKSac	5-20s	Null	Null	Null	Null	Null	16.26	9.19	goodNull
BI.CHTH	35.91	51.13	2015-042-18-57-22	-23.11	-66.69	265	125	223	SKKSac	4-25s	0.91	-44	31	0.72	0.67	2.26	0	fair
BI.CHTH	35.91	51.13	2015-042-18-57-22	-23.11	-66.69	265	125	223	SKSac	5-20s	Null	Null	Null	Null	Null	21.91	8.63	goodNull
BI.CHTH	35.91	51.13	2015-311-07-31-43	-30.88	-71.45	259	132	46	PKSbc	4-25s	0.95	-77	64	0.62	0.46	2.26	0	fair
BI.CHTH	35.91	51.13	2016-041-00-33-05	-30.57	-71.58	259	132	29	PKSbc	4-25s	0.91	-36	16	0.62	0.26	2.26	0	good
BI.CHTH	35.91	51.13	2016-097-06-58-48	-14.07	166.62	87	119	24	SKKSac	5-20s	0.96	-66	32	1.18	0.98	9.12	3.34	fair
BI.CHTH	35.91	51.13	2016-110-05-25-39	-55.73	-27.23	217	113	14	SKKSac	4-25s	0.92	-62	16	2.05	1.64	2.26	0	fair
BI.CHTH	35.91	51.13	2016-141-18-14-04	-25.57	129.88	117	96	10	SKSac	4-25s	Null	Null	Null	Null	Null	2.26	0	fairNull
BI.CHTH	35.91	51.13	2016-291-06-14-58	-6	148.89	90	100	42	SKSac	4-25s	Null	Null	Null	Null	Null	2.26	0	fairNull
BI.CHTH	35.91	51.13	2016-325-20-57-43	-31.64	-68.76	257	131	115	PKSbc	4-25s	0.92	-89	80	1.54	0.87	2.26	0	fair
BI.DAMV	35.63	51.97	2004-197-04-27-08	-17.81	-178.7	82	132	560	PKSbc	4-25s	0.95	-28	51	0.82	1.18	5.74	0	fair
BI.DAMV	35.63	51.97	2004-197-04-27-14	-17.66	-178.76	82	132	565	PKSbc	5-20s	0.95	-67	24	0.76	1.4	11.62	4.37	fair
BI.DAMV	35.63	51.97	2004-241-13-41-25	-35.17	-70.53	253	134	5	PKSbc	5-20s	0.98	87	4	2.06	0.74	10.12	4.2	fair
BI.DAMV	35.63	51.97	2004-250-12-42-59	-55.37	-28.98	218	114	10	SKKSac	4-25s	0.93	-78	8	1.13	0.31	5.74	0	good
BI.DAMV	35.63	51.97	2004-250-12-42-59	-55.37	-28.98	218	114	10	SKSac	4-25s	0.95	52	16	1.74	1.33	5.74	0	fair
BI.DAMV	35.63	51.97	2004-255-21-52-38	-57.98	-25.34	214	113	63	SKKSac	5-20s	0.95	-80	19	1.58	0.9	5.71	1.96	fair
BI.DAMV	35.63	51.97	2004-300-22-53-07	-57.07	-24.68	215	113	10	SKSac	5-20s	Null	Null	Null	Null	Null	16.41	7.66	goodNull
BI.DAMV	35.63	51.97	2004-307-10-02-12	49.28	-128.77	0	95	10	SKSac	5-20s	0.98	-81	8	2.28	1.4	14	4.68	fair
BI.DAMV	35.63	51.97	2004-320-09-06-56	4.7	-77.51	299	118	15	SKSac	5-20s	0.98	-78	57	1.08	1.4	10.03	3.85	fair
BI.DAMV	35.63	51.97	2004-325-08-07-22	9.6	-84.17	309	119	16	SKSac	5-20s	0.94	-56	81	1.68	2.34	7.76	5.39	fair
BI.DAMV	35.63	51.97	2004-326-11-41-07	15.68	-61.71	297	99	14	SKSac	5-20s	0.95	90	6	0.9	0.34	22.5	3.63	fair
BI.DAMV	35.63	51.97	2005-028-15-46-45	-1.09	-81.16	298	125	10	SKSac	5-20s	0.94	-36	57	0.86	1.78	6.06	3.51	fair
BI.DAMV	35.63	51.97	2005-138-10-27-06	-15.32	-173.24	75	135	10	SKSac	5-20s	0.96	-58	19	1.6	0.52	6.95	1.73	fair
BI.DAMV	35.63	51.97	2005-164-22-44-33	-19.99	-69.2	270	126	115	SKKSac	5-20s	0.94	-33	53	0.68	2.42	8.52	4.72	fair
BI.DAMV	35.63	51.97	2005-164-22-44-33	-19.99	-69.2	270	126	115	SKSac	5-20s	0.96	79	80	1.28	1.32	8.8	6.25	fair
BI.DAMV	35.63	51.97	2005-166-02-50-54	41.29	-125.95	358	103	16	SKKSac	5-20s	Null	Null	Null	Null	Null	19.73	9.42	goodNull
BI.DAMV	35.63	51.97	2005-166-19-52-24	-44.87	-80.56	241	143	10	SKSac	5-20s	0.96	82	42	1.4	1.39	5.87	2.47	fair
BI.DAMV	35.63	51.97	2005-269-01-55-37	-5.68	-76.4	290	124	115	SKKSac	5-20s	0.96	3	14	1.2	2.51	7.8	4.17	fair
BI.DAMV	35.63	51.97	2005-269-01-55-37	-5.68	-76.4	290	124	115	SKSac	5-20s	Null	Null	Null	Null	Null	8.68	4.72	goodNull
BI.DAMV	35.63	51.97	2005-302-04-05-56	-45.21	96.9	150	90	8	SKSac	4-25s	0.91	-64	62	0.62	0.56	5.74	0	fair
BI.DAMV	35.63	51.97	2006-033-12-48-43	-17.75	-178.39	82	132	597	PKSbc	5-20s	0.96	-86	11	1.18	2.84	9.44	5.29	fair
BI.DAMV	35.63	51.97	2006-116-01-46-03	-57.48	147.57	141	122	10	SKKSac	5-20s	0.94	-51	18	1.64	1.1	9.13	4.22	fair
BI.DAMV	35.63	51.97	2006-219-22-18-55	-15.8	167.79	88	120	150	SKSac	5-20s	Null	Null	Null	Null	Null	7.58	4.54	fairNull
BI.DAMV	35.63	51.97	2006-237-00-44-46	-24.4	-67.03	264	127	184	SKKSac	5-20s	0.98	-53	38	0.62	1.49	14.36	4.59	fair
BI.DAMV	35.63	51.97	2006-285-18-05-56	-31.26	-71.37	258	133	31	PKSbc	5-20s	0.97	-87	12	1.52	2.5	9.36	4.4	fair
BI.DAMV	35.63	51.97	2006-295-08-55-16	-45.73	95.99	151	90	10	SKSac	4-25s	0.91	89	82	0.92	0.21	5.74	0	fair
BI.DAMV	35.63	51.97	2007-059-23-13-15	-55.24	-29.14	218	114	10	SKKSac	4-25s	0.94	-74	67	1.03	0.92	5.74	0	fair
BI.DAMV	35.63	51.97	2007-106-13-20-38	-58.02	147.96	141	122	10	SKKSac	5-20s	0.96	-69	32	0.38	0.54	3.49	3.04	fair
BI.DAMV	35.63	51.97	2007-193-05-23-49	-7.93	-74.38	286	124	152	SKKSac	5-20s	Null	Null	Null	Null	Null	8.35	3.69	fairNull
BI.DAMV	35.63	51.97	2007-193-05-23-49	-7.93	-74.38	286	124	152	SKSac	5-20s	Null	Null	Null	Null	Null	10.76	5.79	goodNull
BI.DAMV	35.63	51.97	2007-268-05-16-01	-30.96	180	99	137	416	PKSbc	5-20s	0.97	84	11	0.92	1.39	8	4.38	fair
BI.DAMV	35.63	51.97	2007-271-01-01-49	-21.21	169.36	93	124	12	SKKSac	5-20s	0.95	-72	4	1.9	0.39	29.19	3.44	fair
BI.DAMV	35.63	51.97	2007-288-12-29-34	-44.8	167.55	122	131	18	PKSbc	5-20s	0.97	42	15	1.72	1.09	11.49	4.27	fair
BI.DAMV	35.63	51.97	2007-320-03-13-00	-2.31	-77.84	294	123	122	SKSac	5-20s	Null	Null	Null	Null	Null	10.33	7.23	goodNull
BI.DAMV	35.63	51.97	2007-322-05-40-12	-22.64	-66.32	266	125	246	SKKSac	5-20s	0.99	-76	23	1.1	0.81	8.28	3.27	fair
BI.DAMV	35.63	51.97	2007-333-19-00-20	14.94	-61.27	296	99	156	SKSac	4-25s	0.9	-84	77	1.03	0.51	5.74	0	fair
BI.DAMV	35.63	51.97	2008-043-12-50-18	16.36	-94.3	322	119	83	SKKSac	5-20s	Null	Null	Null	Null	Null	15.24	7.61	goodNull
BI.DAMV	35.63	51.97	2008-072-11-23-34	-16.57	167.34	90	120	13	SKSac	4-25s	0.94	-19	38	0.92	1.28	5.74	0	fair
BI.DAMV	35.63	51.97	2008-084-20-39-07	-20.04	-68.96	270	126	120	SKSac	5-20s	0.98	-71	19	0.98	0.6	20.26	4.57	fair
BI.DAMV	35.63	51.97	2008-106-03-03-04	13.56	-90.6	317	120	33	SKKSac	5-20s	0.98	-89	34	0.58	0.71	12.69	5.37	fair
BI.DAMV	35.63	51.97	2008-106-03-03-04	13.56	-90.6	317	120	33	SKSac	5-20s	Null	Null	Null	Null	Null	11.05	6.42	goodNull
BI.DAMV	35.63	51.97	2008-239-21-00-36	-7.64	-74.38	286	124	154	SKKSac	5-20s	0.99	0	13	1.04	2.56	9.29	4.52	fair
BI.DAMV	35.63	51.97	2008-273-15-19-31	-29.76	-177.68	97	138	36	PKSbc	5-20s	0.97	-74	19	1.5	1.1	14.33	6.54	fair
BI.DAMV	35.63	51.97	2008-279-09-12-36	-30.18	-177.18	97	139	10	SKKSac	5-20s	0.95	-66	67	1.32	1.61	8.36	4.93	fair
BI.DAMV	35.63	51.97	2008-285-10-40-14	19.16	-64.83	301	99	23	SKSac	5-20s	0.97	70	15	0.92	0.24	13.91	2.65	fair
BI.DAMV	35.63	51.97	2008-296-12-55-57	-18.41	-175.35	80	135	233	PKSbc	5-20s	0.96	-88	11	2.04	1.98	6.33	3.17	fair
BI.DAMV	35.63	51.97	2008-343-18-39-09	-53.01	106.82	150	100	11	SKSac	5-20s	0.99	-42	18	1.22	0.76	27.05	5.52	fair
BI.DAMV	35.63	51.97	2009-106-14-57-06	-60.2	-26.86	213	115	20	SKKSac	5-20s	0.97	-77	58	0.76	1.69	9.04	5.13	fair
BI.DAMV	35.63	51.97	2009-245-18-00-09	-29.39	-178.96	97	137	257	SKKSac	5-20s	0.96	-89	13	1.8	1.65	7.95	4.85	fair
BI.DAMV	35.63	51.97	2009-281-08-34-36	-12.24	166.49	86	117	35	SKKSac	5-20s	0.93	26	8	2.1	0.33	26.78	2.18	fair
BI.DAMV	35.63	51.97	2009-313-10-44-55	-17.24	178.33	83	129	595	PKSbc	4-25s	0.94	-20	37	0.92	1.03	5.74	0	fair
BI.DAMV	35.63	51.97	2009-318-19-44-29	-22.96	-66.64	266	126	220	SKKSac	5-20s	0.99	-72	38	0.8	0.79	10.46	3.94	fair
BI.DAMV	35.63	51.97	2010-009-05-51-30	-9.13	157.63	88	108	12	SKSac	5-20s	0.95	-54	48	0.82	1.44	7.62	4.31	fair
BI.DAMV	35.63	51.97	2010-063-22-39-26	-22.23	-68.33	267	127	114	SKSac	5-20s	0.97	-12	8	1.72	1.03	10.41	4.43	fair
BI.DAMV	35.63	51.97	2010-064-11-47-06	-36.66	-73.37	252	136	18	PKSbc	4-25s	0.95	-39	57	0.92	0.97	5.74	0	fair
BI.DAMV	35.63	51.97	2010-079-14-00-49	-3.36	152.25	87	100	414	SKSac	5-20s	Null	Null	Null	Null	Null	5.82	5.83	goodNull
BI.DAMV	35.63	51.97	2010-107-23-15-22	-6.67	147.29	92	98	53	SKSac	5-20s	Null	Null	Null	Null	Null	16.53	5.98	goodNull
BI.DAMV	35.63	51.97	2010-147-17-14-46	-13.7	166.64	87	118	31	SKKSac	5-20s	0.98	-30	35	1.14	0.72	3.7	2.25	fair
BI.DAMV	35.63	51.97	2010-216-07-15-33	-5.49	146.82	92	97	220	SKSac	5-20s	0.98	-77	12	1.56	0.9	12.95	4.62	fair
BI.DAMV	35.63	51.97	2010-224-11-54-15	-1.27	-77.31	294	122	206	SKKSac	5-20s	Null	Null	Null	Null	Null	10.74	3.96	goodNull
BI.DAMV	35.63	51.97	2010-224-11-54-15	-1.27	-77.31	294	122	206	SKSac	5-20s	0.98	67	19	0.26	0.22	9.73	8.24	good
BI.DAMV	35.63	51.97	2010-342-05-24-35	-56.41	-25.74	216	113	29	SKKSac	4-25s	0.91	86	72	0.92	0.36	5.74	0	fair
BI.DAMV	35.63	51.97	2010-342-05-24-35	-56.41	-25.74	216	113	29	SKSac	4-25s	0.94	85	63	0.62	0.41	5.74	0	fair
BI.DAMV	35.63	51.97	2011-038-19-53-42	-7.15	155.18	88	105	415	SKSac	5-20s	0.96	-26	45	1.12	1.23	10.79	3.93	fair
BI.DAMV	35.63	51.97	2011-065-12-31-59	-18.02	-69.36	273	126	118	SKKSac	5-20s	0.94	-69	67	1.5	2.52	6.36	3.04	fair
BI.DAMV	35.63	51.97	2011-065-14-32-36	-56.42	-27.06	216	113	88	SKKSac	4-25s	0.95	-76	68	1.03	0.77	5.74	0	fair
BI.DAMV	35.63	51.97	2011-097-13-11-22	17.21	-94.34	323	119	166	SKKSac	5-20s	Null	Null	Null	Null	Null	7.53	10.95	goodNull
BI.DAMV	35.63	51.97	2011-097-13-11-22	17.21	-94.34	323	119	166	SKSac	5-20s	Null	Null	Null	Null	Null	13.72	11.69	goodNull
BI.DAMV	35.63	51.97	2015-023-03-47-27	-17.03	168.52	89	121	219	SKKSac	5-20s	Null	Null	Null	Null	Null	15.28	8.59	goodNull
BI.DAMV	35.63	51.97	2015-023-03-47-27	-17.03	168.52	89	121	219	SKSac	5-20s	Null	Null	Null	Null	Null	12.36	7.3	goodNull
BI.DAMV	35.63	51.97	2016-094-08-23-52	-14.32	166.86	88	118	26	SKSac	5-20s	0.95	-76	66	1.22	1.92	8.53	4.07	fair
BI.DAMV	35.63	51.97	2016-110-05-25-39	-55.73	-27.23	217	113	14	SKKSac	5-20s	0.97	-83	28	1.6	1.23	7.09	2.13	fair
BI.GHIR	28.29	52.99	2004-240-00-43-54	-27.42	-70.81	257	131	30	PKSbc	5-20s	0.99	52	48	0.52	0.75	9.95	4.73	fair
BI.GHIR	28.29	52.99	2004-241-13-41-25	-35.17	-70.53	247	132	5	PKSbc	5-20s	0.95	-1	12	0.72	0.36	6.4	0	good
BI.GHIR	28.29	52.99	2004-250-12-42-59	-55.37	-28.98	217	108	10	SKKSac	5-20s	Null	Null	Null	Null	Null	14.62	8.05	goodNull
BI.GHIR	28.29	52.99	2004-255-21-52-38	-57.98	-25.34	213	108	63	SKKSac	5-20s	0.99	87	24	0.28	0.26	5.61	4.84	fair
BI.GHIR	28.29	52.99	2004-255-21-52-38	-57.98	-25.34	213	108	64	SKSac	5-20s	Null	Null	Null	Null	Null	6.4	0	fairNull
BI.GHIR	28.29	52.99	2004-267-10-08-28	-15.6	-177.28	86	132	19	PKSbc	5-20s	Null	Null	Null	Null	Null	6.4	0	fairNull
BI.GHIR	28.29	52.99	2004-316-17-34-52	-11.13	162.21	91	112	10	SKSac	5-20s	Null	Null	Null	Null	Null	9.66	5.31	goodNull
BI.GHIR	28.29	52.99	2005-028-15-46-45	-1.09	-81.16	293	129	10	SKKSac	5-20s	Null	Null	Null	Null	Null	24.3	8.95	goodNull
BI.GHIR	28.29	52.99	2005-054-11-33-52	-6.25	150.66	92	100	10	SKSac	5-20s	0.96	-37	27	0.6	0.56	6.75	3.49	fair
BI.GHIR	28.29	52.99	2005-140-12-40-42	-24.53	178.84	99	132	565	SKKSac	5-20s	0.98	-36	19	0.26	0.2	8.07	6.34	fair
BI.GHIR	28.29	52.99	2005-153-10-56-01	-24.22	-67	260	126	196	SKKSac	5-20s	0.98	19	17	1.38	0.7	9.25	2.24	fair
BI.GHIR	28.29	52.99	2005-155-14-50-46	-6.32	146.85	94	96	26	SKSac	5-20s	Null	Null	Null	Null	Null	12.84	5.35	goodNull
BI.GHIR	28.29	52.99	2005-164-22-44-33	-19.99	-69.2	265	127	116	SKKSac	5-20s	Null	Null	Null	Null	Null	6.4	0	fairNull
BI.GHIR	28.29	52.99	2005-168-06-21-42	40.77	-126.57	360	111	12	SKKSac	5-20s	0.97	-9	81	1	2	11.19	6.37	fair
BI.GHIR	28.29	52.99	2005-269-01-55-37	-5.68	-76.4	285	127	115	SKKSac	5-20s	Null	Null	Null	Null	Null	6.4	0	fairNull
BI.GHIR	28.29	52.99	2005-321-19-26-54	-22.36	-67.89	262	127	147	SKKSac	5-20s	0.98	16	59	0.68	1.44	7.68	4.18	fair
BI.GHIR	28.29	52.99	2005-321-19-26-54	-22.36	-67.89	262	127	147	SKSac	5-20s	0.93	14	38	0.62	0.87	6.4	0	fair
BI.GHIR	28.29	52.99	2006-057-03-08-27	-23.61	-179.99	97	132	535	SKSac	5-20s	Null	Null	Null	Null	Null	6.26	3.54	goodNull
BI.GHIR	28.29	52.99	2006-066-06-28-55	-14.8	167.37	92	118	136	SKSac	5-20s	0.97	40	24	0.3	0.28	5.22	4.34	fair
BI.GHIR	28.29	52.99	2006-083-12-27-05	-3.25	143.14	93	92	12	SKSac	5-20s	Null	Null	Null	Null	Null	6.4	0	fairNull
BI.GHIR	28.29	52.99	2006-120-19-17-14	-27.02	-71.02	258	131	12	PKSbc	5-20s	0.91	-1	22	0.92	0.77	6.4	0	fair
BI.GHIR	28.29	52.99	2006-130-02-42-51	52.52	-169.26	24	91	18	SKSac	5-20s	Null	Null	Null	Null	Null	6.4	0	fairNull
BI.GHIR	28.29	52.99	2006-197-11-42-41	-28.71	-72.54	256	132	10	PKSbc	5-20s	0.92	15	24	0.72	0.51	6.4	0	fair
BI.GHIR	28.29	52.99	2006-237-00-44-46	-24.4	-67.03	259	127	184	SKKSac	5-20s	0.92	9	12	1.13	0.56	6.4	0	fair
BI.GHIR	28.29	52.99	2006-237-00-44-46	-24.4	-67.03	259	127	184	SKSac	5-20s	0.93	-1	7	1.44	0.82	6.4	0	fair
BI.GHIR	28.29	52.99	2006-260-09-34-13	-31.73	-67.14	251	129	137	SKSac	5-20s	0.98	-8	38	1	1.18	11.77	5.63	fair
BI.GHIR	28.29	52.99	2006-271-06-22-09	-16.59	-172.03	84	137	28	PKSbc	5-20s	0.95	6	70	1.06	1.49	7.12	4.03	fair
BI.GHIR	28.29	52.99	2006-285-18-05-56	-31.26	-71.37	252	132	31	PKSbc	5-20s	0.97	-6	72	1.02	3	8.05	5.93	fair
BI.GHIR	28.29	52.99	2006-290-01-25-12	-5.88	150.98	91	100	32	SKSac	5-20s	Null	Null	Null	Null	Null	6.4	0	fairNull
BI.GHIR	28.29	52.99	2006-317-01-26-35	-26.05	-63.28	256	124	572	SKKSac	5-20s	0.92	-2	9	1.33	0.82	6.4	0	fair
BI.GHIR	28.29	52.99	2006-317-01-26-35	-26.05	-63.28	256	124	572	SKSac	5-20s	0.96	8	17	0.8	0.46	10.73	3.01	fair
BI.GHIR	28.29	52.99	2007-030-04-54-50	-54.74	146.3	141	114	11	SKSac	5-20s	Null	Null	Null	Null	Null	6.65	4.07	goodNull
BI.GHIR	28.29	52.99	2007-111-07-12-48	-3.55	151.27	89	99	407	SKSac	5-20s	0.99	-30	60	0.28	2.42	11.03	6.72	fair
BI.GHIR	28.29	52.99	2007-115-13-34-14	-14.29	166.86	92	117	55	SKSac	5-20s	Null	Null	Null	Null	Null	7.89	3.97	goodNull
BI.GHIR	28.29	52.99	2007-196-13-08-01	52.49	-168.03	24	92	15	SKSac	5-20s	Null	Null	Null	Null	Null	6.4	0	fairNull
BI.GHIR	28.29	52.99	2007-202-15-34-52	-22.15	-65.78	262	125	290	SKKSac	5-20s	0.94	6	30	0.62	0.62	6.4	0	fair
BI.GHIR	28.29	52.99	2007-202-15-34-52	-22.15	-65.78	262	125	290	SKSac	5-20s	0.96	10	32	0.51	0.62	6.4	0	fair
BI.GHIR	28.29	52.99	2007-228-08-39-28	-9.83	159.47	91	109	15	SKSac	5-20s	0.96	-40	27	0.62	0.74	5.88	4.32	fair
BI.GHIR	28.29	52.99	2007-270-19-57-44	-21.1	169.28	98	122	9	SKKSac	5-20s	0.96	26	31	1.5	1.26	9.13	2.89	fair
BI.GHIR	28.29	52.99	2007-270-19-57-44	-21.1	169.28	98	122	9	SKSac	5-20s	Null	Null	Null	Null	Null	8.36	5.1	fairNull
BI.GHIR	28.29	52.99	2007-271-01-01-49	-21.21	169.36	98	122	12	SKKSac	5-20s	Null	Null	Null	Null	Null	6.4	0	fairNull
BI.GHIR	28.29	52.99	2007-271-01-01-49	-21.21	169.36	98	122	12	SKSac	5-20s	Null	Null	Null	Null	Null	19.82	7.41	goodNull
BI.GHIR	28.29	52.99	2007-271-01-35-51	-21.13	169.37	98	122	10	SKKSac	5-20s	0.98	17	77	1.16	1.83	11.01	6.94	fair
BI.GHIR	28.29	52.99	2007-271-01-35-51	-21.13	169.37	98	122	10	SKSac	5-20s	Null	Null	Null	Null	Null	13.55	5.5	goodNull
BI.GHIR	28.29	52.99	2007-273-09-47-51	-49.14	164.11	132	124	18	SKKSac	5-20s	Null	Null	Null	Null	Null	6.4	0	fairNull
BI.GHIR	28.29	52.99	2007-282-15-03-41	-4.81	152.89	90	101	39	SKSac	5-20s	0.92	-9	38	1.03	1.33	6.4	0	fair
BI.GHIR	28.29	52.99	2007-319-15-03-08	-22.87	-70.41	262	129	27	SKKSac	5-20s	0.96	9	63	1.08	1.76	5.89	3.35	fair
BI.GHIR	28.29	52.99	2007-320-03-13-00	-2.31	-77.84	290	127	123	SKKSac	5-20s	Null	Null	Null	Null	Null	6.4	0	fairNull
BI.GHIR	28.29	52.99	2007-320-03-13-00	-2.31	-77.84	290	127	123	SKSac	5-20s	Null	Null	Null	Null	Null	6.4	0	fairNull
BI.GHIR	28.29	52.99	2007-322-05-40-12	-22.64	-66.32	261	125	246	SKKSac	5-20s	0.91	5	26	0.92	0.87	6.4	0	fair
BI.GHIR	28.29	52.99	2007-322-05-40-12	-22.64	-66.32	261	125	246	SKSac	5-20s	Null	Null	Null	Null	Null	6.4	0	fairNull
BI.GHIR	28.29	52.99	2007-360-22-04-54	52.56	-168.22	24	92	25	SKSac	5-20s	0.96	15	5	1.03	0.51	6.4	0	fair
BI.GHIR	28.29	52.99	2008-043-12-50-18	16.36	-94.3	320	125	83	SKKSac	5-20s	0.96	41	4	1.13	0.56	6.4	0	fair
BI.GHIR	28.29	52.99	2008-072-11-23-34	-16.57	167.34	94	119	13	SKSac	5-20s	Null	Null	Null	Null	Null	6.4	0	fairNull
BI.GHIR	28.29	52.99	2008-084-20-39-07	-20.04	-68.96	265	127	120	SKKSac	5-20s	0.97	48	30	0.32	0.54	5.3	4.48	good
BI.GHIR	28.29	52.99	2008-084-20-39-07	-20.04	-68.96	265	127	120	SKSac	5-20s	Null	Null	Null	Null	Null	7.25	8.15	goodNull
BI.GHIR	28.29	52.99	2008-100-12-46-12	-20.07	168.89	97	122	33	SKKSac	5-20s	Null	Null	Null	Null	Null	9.69	6.33	goodNull
BI.GHIR	28.29	52.99	2008-103-00-30-12	-55.66	158.45	140	121	16	SKKSac	5-20s	0.98	9	15	1.56	0.58	7.03	1.45	fair
BI.GHIR	28.29	52.99	2008-105-09-45-19	-56.02	-28.04	216	108	140	SKSac	5-20s	Null	Null	Null	Null	Null	13.58	6.14	goodNull
BI.GHIR	28.29	52.99	2008-119-15-57-55	-58.74	-24.71	212	108	35	SKKSac	5-20s	0.98	55	63	0.48	1.49	9.13	5.9	fair
BI.GHIR	28.29	52.99	2008-119-15-57-55	-58.74	-24.71	212	108	35	SKSac	5-20s	Null	Null	Null	Null	Null	9.61	4.52	goodNull
BI.GHIR	28.29	52.99	2008-123-01-33-37	51.86	-177.53	29	89	14	SKSac	5-20s	Null	Null	Null	Null	Null	6.4	0	fairNull
BI.GHIR	28.29	52.99	2008-146-19-18-25	56.09	-153.78	15	93	22	SKSac	5-20s	Null	Null	Null	Null	Null	14.62	9.45	goodNull
BI.GHIR	28.29	52.99	2008-190-09-13-07	-15.99	-71.75	271	128	123	SKKSac	5-20s	0.95	45	20	0.42	0.36	6.25	4.51	fair
BI.GHIR	28.29	52.99	2009-059-14-33-06	-60.52	-24.8	211	109	15	SKKSac	5-20s	Null	Null	Null	Null	Null	13.49	9.84	goodNull
BI.GHIR	28.29	52.99	2009-106-14-57-06	-60.2	-26.86	211	109	20	SKKSac	5-20s	0.98	80	25	0.36	0.44	7.71	5.47	fair
BI.GHIR	28.29	52.99	2009-106-14-57-06	-60.2	-26.86	211	109	20	SKSac	5-20s	Null	Null	Null	Null	Null	6.4	0	fairNull
BI.GHIR	28.29	52.99	2009-136-18-22-26	56.45	-152.43	14	93	20	SKSac	5-20s	Null	Null	Null	Null	Null	6.4	0	fairNull
BI.GHIR	28.29	52.99	2009-144-00-58-02	-31.48	-177.68	107	136	4	SKKSac	5-20s	0.95	63	30	0.62	0.88	8.46	3.8	fair
BI.GHIR	28.29	52.99	2009-153-02-17-03	-17.76	167.95	95	120	15	SKKSac	5-20s	0.94	31	52	0.64	1.25	7.61	4.07	fair
BI.GHIR	28.29	52.99	2009-153-02-17-03	-17.76	167.95	95	120	15	SKSac	5-20s	0.98	28	68	0.52	3.5	12.36	7.1	fair
BI.GHIR	28.29	52.99	2009-193-06-12-47	-15.04	-70.44	272	126	198	SKSac	5-20s	0.95	35	43	0.58	0.83	7.35	3.34	fair
BI.GHIR	28.29	52.99	2009-284-03-12-13	-22	170.25	99	123	10	SKKSac	5-20s	0.99	55	28	0.3	0.3	9.99	6.34	fair
BI.GHIR	28.29	52.99	2009-286-05-37-23	52.75	-167	23	92	24	SKSac	5-20s	0.92	18	2	1.54	0.72	6.4	0	fair
BI.GHIR	28.29	52.99	2009-286-20-21-53	52.6	-167.12	23	92	14	SKSac	5-20s	0.9	17	3	1.23	0.62	6.4	0	fair
BI.GHIR	28.29	52.99	2009-318-19-44-29	-22.96	-66.64	261	126	220	SKKSac	5-20s	0.95	11	22	0.72	0.51	6.4	0	fair
BI.GHIR	28.29	52.99	2009-318-19-44-29	-22.96	-66.64	261	126	220	SKSac	5-20s	0.91	15	37	0.31	0.51	6.4	0	fair
BI.GHIR	28.29	52.99	2009-321-15-30-47	52.12	-131.4	3	100	17	SKSac	5-20s	Null	Null	Null	Null	Null	13.22	7.53	goodNull
BI.GHIR	28.29	52.99	2009-343-09-46-03	-22.15	170.96	99	124	45	SKSac	5-20s	0.99	19	48	1.42	1.81	11.24	5.03	fair
BI.GHIR	28.29	52.99	2010-009-05-51-30	-9.13	157.63	91	107	12	SKSac	5-20s	Null	Null	Null	Null	Null	8.49	4.71	fairNull
BI.GHIR	28.29	52.99	2010-044-02-34-28	-21.9	-174.77	93	137	11	PKSbc	5-20s	Null	Null	Null	Null	Null	6.4	0	fairNull
BI.GHIR	28.29	52.99	2010-058-17-24-30	-36.35	-73.21	246	134	19	PKSbc	5-20s	0.95	-11	23	1.2	0.86	12.45	4.57	fair
BI.GHIR	28.29	52.99	2010-059-11-25-35	-34.9	-71.62	247	133	46	PKSbc	5-20s	0.93	-4	7	1.23	0.41	6.4	0	fair
BI.GHIR	28.29	52.99	2010-062-17-44-25	-36.61	-73.36	245	134	20	PKSbc	5-20s	0.93	-5	19	0.92	0.62	6.4	0	fair
BI.GHIR	28.29	52.99	2010-062-17-44-25	-36.61	-73.36	245	134	20	SKKSac	5-20s	0.94	3	23	1.03	0.67	6.4	0	fair
BI.GHIR	28.29	52.99	2010-063-14-02-27	-13.57	167.23	91	118	176	SKSac	5-20s	0.99	48	28	0.34	0.3	11.28	6.28	fair
BI.GHIR	28.29	52.99	2010-063-22-39-26	-22.23	-68.33	262	127	114	SKSac	5-20s	0.97	5	40	1.14	0.99	10.24	4	fair
BI.GHIR	28.29	52.99	2010-064-09-19-36	-36.63	-73.22	245	134	30	PKSbc	5-20s	0.91	9	24	0.72	0.46	6.4	0	fair
BI.GHIR	28.29	52.99	2010-064-09-19-36	-36.63	-73.22	245	134	30	SKKSac	5-20s	0.94	10	26	1.03	0.72	6.4	0	fair
BI.GHIR	28.29	52.99	2010-064-11-47-06	-36.66	-73.37	245	134	18	PKSbc	5-20s	0.91	-9	34	0.72	0.92	6.4	0	fair
BI.GHIR	28.29	52.99	2010-064-11-47-06	-36.66	-73.37	245	134	18	SKKSac	5-20s	0.91	17	36	0.51	0.67	6.4	0	fair
BI.GHIR	28.29	52.99	2010-070-14-39-43	-34.29	-71.89	248	133	11	PKSbc	5-20s	0.93	29	25	0.51	0.36	6.4	0	good
BI.GHIR	28.29	52.99	2010-070-14-55-27	-34.33	-71.8	248	133	18	PKSbc	5-20s	0.97	23	26	0.68	0.47	9.37	3.84	fair
BI.GHIR	28.29	52.99	2010-075-02-21-57	-36.22	-73.26	246	134	18	PKSbc	5-20s	0.92	-4	32	0.62	0.67	6.4	0	fair
BI.GHIR	28.29	52.99	2010-079-14-00-49	-3.36	152.25	89	100	414	SKSac	5-20s	Null	Null	Null	Null	Null	7.18	6.9	goodNull
BI.GHIR	28.29	52.99	2010-087-21-38-28	-35.39	-73.39	247	134	30	PKSbc	5-20s	0.96	-5	17	0.62	0.41	6.4	0	fair
BI.GHIR	28.29	52.99	2010-092-22-58-07	-36.23	-72.88	246	134	24	PKSbc	5-20s	0.98	-5	4	1.34	0.21	27.4	2.59	fair
BI.GHIR	28.29	52.99	2010-092-22-58-07	-36.23	-72.88	246	134	24	SKKSac	5-20s	0.94	-5	48	0.9	1.07	5.82	3.1	fair
BI.GHIR	28.29	52.99	2010-097-14-33-01	-3.76	141.94	94	91	23	SKSac	5-20s	Null	Null	Null	Null	Null	6.4	0	fairNull
BI.GHIR	28.29	52.99	2010-113-10-03-06	-37.53	-72.97	244	134	32	PKSbc	5-20s	0.93	-10	9	1.13	0.56	6.4	0	fair
BI.GHIR	28.29	52.99	2010-123-23-09-44	-38.07	-73.45	243	135	19	PKSbc	5-20s	0.93	-4	22	0.82	0.56	6.4	0	fair
BI.GHIR	28.29	52.99	2010-123-23-09-44	-38.07	-73.45	243	135	19	SKKSac	5-20s	0.92	-9	9	1.23	0.51	6.4	0	fair
BI.GHIR	28.29	52.99	2010-147-17-14-46	-13.7	166.64	92	117	31	SKKSac	5-20s	0.94	55	21	0.64	0.5	4.04	3.58	fair
BI.GHIR	28.29	52.99	2010-181-07-22-27	16.4	-97.78	324	127	20	SKSac	5-20s	0.98	32	32	1.06	0.94	8.24	2.89	fair
BI.GHIR	28.29	52.99	2010-193-00-11-21	-22.15	-68.22	263	127	115	SKKSac	5-20s	Null	Null	Null	Null	Null	5	2.83	goodNull
BI.GHIR	28.29	52.99	2010-195-08-32-21	-38.07	-73.31	243	135	22	PKSbc	5-20s	0.97	-8	38	1.22	1.29	9.73	3.95	fair
BI.GHIR	28.29	52.99	2010-227-15-09-29	-5.69	148.34	92	97	174	SKSac	5-20s	0.99	-5	10	1.48	0.87	16.99	5.93	fair
BI.GHIR	28.29	52.99	2010-294-02-49-55	-34.74	-73.73	248	135	8	PKSbc	5-20s	0.93	4	16	0.82	0.46	6.4	0	fair
BI.GHIR	28.29	52.99	2010-342-05-24-35	-56.41	-25.74	215	107	29	SKKSac	5-20s	Null	Null	Null	Null	Null	8.61	4.5	goodNull
BI.GHIR	28.29	52.99	2011-001-09-56-58	-26.8	-63.14	255	124	576	SKSac	5-20s	0.97	33	34	0.62	0.52	9.12	3.08	fair
BI.GHIR	28.29	52.99	2011-002-20-20-17	-38.35	-73.33	243	135	24	PKSbc	5-20s	0.96	-13	18	1.48	0.97	8.37	3.72	fair
BI.GHIR	28.29	52.99	2011-038-19-53-42	-7.15	155.18	91	104	415	SKSac	5-20s	Null	Null	Null	Null	Null	6.4	0	fairNull
BI.GHIR	28.29	52.99	2011-065-12-31-59	-18.02	-69.36	268	126	118	SKSac	5-20s	0.99	7	57	1.3	1.56	9.7	5.29	fair
BI.GHIR	28.29	52.99	2011-065-14-32-36	-56.42	-27.06	215	108	87	SKSac	5-20s	Null	Null	Null	Null	Null	8.82	9.17	goodNull
BI.GHIR	28.29	52.99	2011-093-14-07-09	-17.64	-178.59	89	132	552	SKKSac	5-20s	0.95	14	27	0.72	0.67	6.4	0	fair
BI.GHIR	28.29	52.99	2011-097-13-11-22	17.21	-94.34	321	125	166	SKKSac	5-20s	0.98	5	23	0.38	0.32	9.6	5.91	good
BI.GHIR	28.29	52.99	2011-097-13-11-22	17.21	-94.34	321	125	166	SKSac	5-20s	0.98	4	24	0.54	0.3	9.15	4.81	good
BI.GHIR	28.29	52.99	2011-108-13-03-02	-34.34	179.87	112	135	86	SKSac	5-20s	Null	Null	Null	Null	Null	11.54	7.58	goodNull
BI.GHIR	28.29	52.99	2011-171-16-36-01	-21.7	-68.23	263	127	128	SKKSac	5-20s	0.91	32	37	0.31	0.51	6.4	0	fair
BI.GHIR	28.29	52.99	2011-171-16-36-01	-21.7	-68.23	263	127	128	SKSac	5-20s	0.9	36	36	0.31	0.46	6.4	0	fair
BI.GHIR	28.29	52.99	2011-197-00-26-12	-33.82	-71.83	249	133	20	PKSbc	5-20s	0.94	22	26	0.62	0.36	6.4	0	fair
BI.GHIR	28.29	52.99	2011-332-12-26-45	-5.48	153.73	90	102	25	SKSac	5-20s	0.94	-38	34	0.31	0.36	6.4	0	fair
BI.GHIR	28.29	52.99	2011-341-22-23-09	-27.9	-70.92	256	131	20	PKSbc	5-20s	0.97	4	70	0.58	1.54	7.46	5.09	fair
BI.GHIR	28.29	52.99	2012-021-18-47-11	14.87	-93	318	126	45	SKSac	5-20s	0.99	36	15	1.36	0.84	20.38	4.68	fair
BI.GHIR	28.29	52.99	2012-023-16-04-52	-36.41	-73.03	245	134	20	PKSbc	5-20s	0.92	13	19	0.51	0.26	6.4	0	good
BI.GHIR	28.29	52.99	2012-023-16-04-52	-36.41	-73.03	245	134	20	SKKSac	5-20s	0.95	31	28	0.72	0.62	6.4	0	fair
BI.GHIR	28.29	52.99	2012-093-17-36-42	16.39	-98.32	324	128	9	SKSac	5-20s	0.98	12	31	0.7	0.78	7.11	2.91	fair
BI.GHIR	28.29	52.99	2012-108-03-50-15	-32.62	-71.36	250	132	29	PKSbc	5-20s	0.93	5	11	1.23	0.51	6.4	0	fair
BI.GHIR	28.29	52.99	2012-149-05-07-23	-28.04	-63.09	254	124	587	SKSac	5-20s	0.95	-5	22	1.03	0.92	6.4	0	fair
BI.GHIR	28.29	52.99	2012-210-20-03-56	-4.65	153.17	89	101	41	SKSac	5-20s	0.93	-6	8	1.33	1.13	6.4	0	fair
BI.GHIR	28.29	52.99	2012-215-09-56-41	-4.65	153.28	89	101	46	SKSac	5-20s	Null	Null	Null	Null	Null	17	7.04	goodNull
BI.GHIR	28.29	52.99	2012-317-20-42-14	57.79	-142.85	8	93	9	SKSac	5-20s	Null	Null	Null	Null	Null	16.32	9.7	goodNull
BI.GHIR	28.29	52.99	2012-319-19-02-06	-29.12	-71.19	255	131	63	SKKSac	5-20s	0.96	13	23	0.72	0.51	6.4	0	fair
BI.GHIR	28.29	52.99	2013-030-20-15-43	-28.09	-70.65	256	131	45	PKSbc	5-20s	0.94	14	19	0.62	0.31	6.4	0	fair
BI.GHIR	28.29	52.99	2013-039-11-12-11	-10.84	165.97	89	115	12	SKSac	5-20s	0.97	10	10	1.32	0.69	20.34	5.67	fair
BI.GHIR	28.29	52.99	2013-053-12-01-58	-27.93	-63.1	254	124	575	SKSac	5-20s	0.96	33	15	0.24	0.18	5.7	4.93	fair
BI.GHIR	28.29	52.99	2013-188-20-30-06	-6.03	149.71	92	99	56	SKSac	5-20s	Null	Null	Null	Null	Null	12.99	8.95	goodNull
BI.GHIR	28.29	52.99	2013-246-20-19-06	51.24	-130.4	2	101	2	SKSac	5-20s	Null	Null	Null	Null	Null	11.87	7.07	goodNull
BI.GHIR	28.29	52.99	2016-041-00-33-05	-30.57	-71.58	253	132	29	PKSbc	5-20s	0.94	25	20	0.62	0.21	6.4	0	fair
BI.GHIR	28.29	52.99	2016-053-06-36-59	-30.42	-72.3	253	133	12	PKSbc	5-20s	0.99	2	55	1.04	0.81	9.04	4.03	fair
BI.GHVR	34.48	51.25	2007-059-23-13-15	-55.24	-29.14	218	113	10	SKKSac	5-20s	0.97	76	39	0.84	0.93	8.32	3.34	fair
BI.GHVR	34.48	51.25	2007-094-06-34-35	-7.76	156.49	88	107	17	SKKSac	5-20s	0.97	-62	23	1.12	0.58	8.56	2.3	fair
BI.GHVR	34.48	51.25	2007-094-06-34-35	-7.76	156.49	88	107	17	SKSac	4-25s	0.9	123	26	0.82	0.62	-6.8	0	fair
BI.GHVR	34.48	51.25	2007-094-11-02-29	-20.69	169.06	93	124	10	SKKSac	5-20s	0.93	-61	53	1.32	2.07	5.25	2.65	fair
BI.GHVR	34.48	51.25	2007-111-07-12-48	-3.55	151.27	87	100	407	SKSac	5-20s	0.94	-63	18	1.2	0.52	6.76	2.17	fair
BI.GHVR	34.48	51.25	2007-111-17-53-46	-45.24	-72.65	238	136	36	SKKSac	5-20s	0.94	-59	22	1.3	0.65	6.5	2.16	fair
BI.GHVR	34.48	51.25	2007-121-00-15-20	-7.12	155.13	88	105	9	SKKSac	4-25s	0.92	-60	18	0.92	0.46	-6.8	0	fair
BI.GHVR	34.48	51.25	2007-121-00-15-20	-7.12	155.13	88	105	9	SKKSac	4-25s	0.93	-60	19	0.92	0.46	-6.8	0	fair
BI.GHVR	34.48	51.25	2007-121-00-15-20	-7.12	155.13	88	105	9	SKSac	4-25s	0.94	-77	27	1.33	1.23	-6.8	0	fair
BI.GHVR	34.48	51.25	2007-203-10-49-35	-2.8	141.66	92	92	10	SKSac	4-25s	0.93	-74	3	1.54	0.41	-6.8	0	fair
BI.GHVR	34.48	51.25	2007-228-08-39-28	-9.83	159.47	88	110	15	SKSac	5-20s	Null	Null	Null	Null	Null	13.85	7.39	goodNull
BI.GHVR	34.48	51.25	2007-238-12-37-31	-17.46	-174.34	79	136	127	SKKSac	5-20s	0.98	-82	11	1.4	0.61	12.16	2.96	fair
BI.GHVR	34.48	51.25	2007-270-19-57-44	-21.1	169.28	93	124	9	SKKSac	5-20s	0.96	-35	47	0.68	1.54	7.33	3.78	fair
BI.GHVR	34.48	51.25	2007-271-00-44-47	-21.28	169.26	94	124	10	SKKSac	4-25s	0.91	-53	27	0.72	0.46	-6.8	0	fair
BI.GHVR	34.48	51.25	2007-271-01-01-49	-21.21	169.36	93	124	12	SKKSac	5-20s	0.99	-16	34	0.9	0.78	32.82	6.47	fair
BI.GHVR	34.48	51.25	2007-271-01-35-51	-21.13	169.37	93	124	10	SKKSac	4-25s	Null	Null	Null	Null	Null	-6.8	0	fairNull
BI.GHVR	34.48	51.25	2007-278-07-17-52	-25.19	179.46	93	135	509	SKKSac	5-20s	0.98	-77	15	1.7	1.68	8.67	4.56	fair
BI.GHVR	34.48	51.25	2007-289-21-05-43	-25.77	179.53	93	135	509	SKKSac	5-20s	0.94	-71	51	1.18	1.3	7.31	3.69	fair
BI.GHVR	34.48	51.25	2007-320-03-13-00	-2.31	-77.84	293	123	122	SKKSac	5-20s	0.93	76	26	0.42	1.1	4.06	3.49	fair
BI.GHVR	34.48	51.25	2007-320-03-13-00	-2.31	-77.84	293	123	123	SKSac	4-25s	Null	Null	Null	Null	Null	-6.8	0	fairNull
BI.GHVR	34.48	51.25	2007-323-00-52-12	-21.18	-178.75	87	134	558	PKSbc	5-20s	0.97	-16	23	1.38	1.1	14.23	5.05	fair
BI.GHVR	34.48	51.25	2007-333-19-00-20	14.94	-61.27	295	99	156	SKSac	5-20s	Null	Null	Null	Null	Null	17.41	7.79	goodNull
BI.GHVR	34.48	51.25	2007-356-07-11-08	-2.41	139.07	93	90	20	SKKSac	4-25s	0.93	-69	24	0.92	0.82	-6.8	0	fair
BI.GHVR	34.48	51.25	2007-356-07-11-08	-2.41	139.07	93	90	20	SKSac	4-25s	0.95	-71	24	1.03	0.87	-6.8	0	fair
BI.GHVR	34.48	51.25	2008-043-12-50-18	16.36	-94.3	321	120	83	SKKSac	5-20s	0.99	-81	27	0.72	0.41	18.87	4.33	good
BI.GHVR	34.48	51.25	2008-043-12-50-18	16.36	-94.3	321	120	83	SKSac	5-20s	0.98	-68	28	0.56	0.48	3.61	2.83	fair
BI.GHVR	34.48	51.25	2008-084-20-39-07	-20.04	-68.96	269	126	120	SKKSac	5-20s	Null	Null	Null	Null	Null	12.79	4.42	goodNull
BI.GHVR	34.48	51.25	2008-100-11-13-17	-20.18	168.86	93	124	16	SKKSac	5-20s	0.97	-49	21	0.5	0.34	5.72	4.17	good
BI.GHVR	34.48	51.25	2008-106-03-03-04	13.56	-90.6	316	120	33	SKSac	5-20s	0.96	75	39	1.24	1.32	7.09	2.54	fair
BI.GHVR	34.48	51.25	2008-109-20-39-07	-17.34	-179.02	82	132	554	PKSbc	4-25s	0.9	-31	11	1.13	0.51	-6.8	0	fair
BI.GHVR	34.48	51.25	2008-201-09-27-01	-11.04	164.49	86	115	11	SKKSac	5-20s	0.95	-40	24	1.26	0.65	8	1.99	fair
BI.GHVR	34.48	51.25	2008-201-22-39-52	-17.34	-177.31	81	134	391	PKSbc	4-25s	0.91	-55	35	0.72	0.82	-6.8	0	fair
BI.GHVR	34.48	51.25	2008-201-22-39-52	-17.34	-177.31	81	134	391	SKKSac	4-25s	0.95	-74	19	1.33	0.82	-6.8	0	fair
BI.GHVR	34.48	51.25	2008-239-21-00-36	-7.64	-74.38	285	123	154	SKKSac	5-20s	0.95	-36	34	0.4	0.84	4.9	3.8	fair
BI.GHVR	34.48	51.25	2008-243-06-54-07	-6.15	147.26	92	98	75	SKSac	4-25s	Null	Null	Null	Null	Null	-6.8	0	fairNull
BI.GHVR	34.48	51.25	2008-252-03-03-15	-19.96	169.11	92	124	36	SKKSac	5-20s	0.98	-60	46	0.88	0.95	9.73	3.43	fair
BI.GHVR	34.48	51.25	2008-273-15-19-31	-29.76	-177.68	97	139	36	SKKSac	5-20s	0.97	-25	47	0.86	1.27	6.29	3.24	fair
BI.GHVR	34.48	51.25	2008-285-10-40-14	19.16	-64.83	301	99	23	SKSac	5-20s	0.97	82	26	0.8	0.62	3.92	2.31	fair
BI.GHVR	34.48	51.25	2008-296-12-55-57	-18.41	-175.35	81	136	233	SKKSac	5-20s	0.94	-48	26	1.12	0.59	9.1	2.47	fair
BI.GHVR	34.48	51.25	2008-306-01-13-09	-3.4	148.71	89	98	10	SKSac	5-20s	0.97	-77	20	1.4	0.42	12.52	4.2	fair
BI.GHVR	34.48	51.25	2008-313-07-49-59	-15.22	-174.23	76	135	121	PKSbc	5-20s	0.97	-63	15	1.1	0.29	13.67	3.23	fair
BI.GHVR	34.48	51.25	2009-116-00-06-53	-30.3	-178.58	99	138	131	SKKSac	5-20s	0.99	-29	29	0.3	0.34	6.69	5.34	good
BI.GHVR	34.48	51.25	2009-153-02-17-03	-17.76	167.95	91	122	15	SKKSac	4-25s	Null	Null	Null	Null	Null	-6.8	0	fairNull
BI.GHVR	34.48	51.25	2009-153-02-17-03	-17.76	167.95	91	122	15	SKSac	4-25s	Null	Null	Null	Null	Null	-6.8	0	fairNull
BI.GHVR	34.48	51.25	2009-222-04-06-31	-11.61	166.09	86	117	35	SKKSac	5-20s	0.97	-68	29	1.04	0.75	9.22	3.29	fair
BI.GHVR	34.48	51.25	2009-245-18-00-09	-29.39	-178.96	98	137	257	SKKSac	5-20s	Null	Null	Null	Null	Null	6.61	4.71	goodNull
BI.GHVR	34.48	51.25	2009-313-10-44-55	-17.24	178.33	84	130	595	PKSbc	4-25s	0.9	-73	13	1.44	0.67	-6.8	0	fair
BI.GHVR	34.48	51.25	2009-318-19-44-29	-22.96	-66.64	265	125	220	SKKSac	5-20s	0.98	-64	26	0.38	0.38	4.02	3.48	fair
BI.GHVR	34.48	51.25	2009-321-15-30-47	52.12	-131.4	2	94	17	SKSac	4-25s	0.91	-75	5	1.54	0.56	-6.8	0	fair
BI.GHVR	34.48	51.25	2009-326-07-48-20	-17.79	-178.43	82	133	522	PKSbc	5-20s	0.95	-69	21	1.42	0.59	9.06	2.78	fair
BI.GHVR	34.48	51.25	2009-343-09-46-03	-22.15	170.96	94	126	45	SKSac	5-20s	0.98	-26	23	1.4	0.75	8.37	2.13	fair
BI.GHVR	34.48	51.25	2010-009-05-51-30	-9.13	157.63	88	109	12	SKSac	5-20s	0.94	-37	44	0.84	1.4	6.31	3.38	fair
BI.GHVR	34.48	51.25	2010-063-14-02-27	-13.57	167.23	87	119	176	SKKSac	4-25s	0.92	-62	17	1.13	0.51	-6.8	0	fair
BI.GHVR	34.48	51.25	2010-070-14-39-43	-34.29	-71.89	253	134	11	PKSbc	5-20s	0.95	-85	16	0.74	0.99	9.03	5.18	fair
BI.GHVR	34.48	51.25	2010-075-02-21-57	-36.22	-73.26	251	135	18	PKSbc	4-25s	Null	Null	Null	Null	Null	-6.8	0	fairNull
BI.GHVR	34.48	51.25	2010-079-14-00-49	-3.36	152.25	87	101	415	SKSac	4-25s	0.95	-70	18	0.92	0.56	-6.8	0	fair
BI.GHVR	34.48	51.25	2010-107-23-15-22	-6.67	147.29	92	99	53	SKSac	4-25s	0.94	-70	13	1.13	0.72	-6.8	0	fair
BI.GHVR	34.48	51.25	2010-123-23-09-44	-38.07	-73.45	249	136	19	PKSbc	5-20s	0.93	-37	26	1.52	1.28	6.91	3.52	fair
BI.GHVR	34.48	51.25	2010-147-17-14-46	-13.7	166.64	87	118	31	SKKSac	5-20s	Null	Null	Null	Null	Null	12.3	4.41	goodNull
BI.GHVR	34.48	51.25	2010-177-05-30-19	-10.63	161.45	88	113	35	SKKSac	5-20s	0.99	-28	50	0.54	0.92	21.98	6.54	fair
BI.GHVR	34.48	51.25	2010-199-13-04-09	-5.97	150.43	90	101	28	SKSac	4-25s	Null	Null	Null	Null	Null	-6.8	0	fairNull
BI.GHVR	34.48	51.25	2010-216-07-15-33	-5.49	146.82	91	98	220	SKSac	4-25s	Null	Null	Null	Null	Null	-6.8	0	fairNull
BI.GHVR	34.48	51.25	2010-224-11-54-15	-1.27	-77.31	293	122	206	SKKSac	5-20s	Null	Null	Null	Null	Null	8.38	3.66	goodNull
BI.GHVR	34.48	51.25	2010-224-11-54-15	-1.27	-77.31	293	122	206	SKSac	5-20s	0.97	-83	51	1.48	2.54	6.85	4.06	fair
BI.GHVR	34.48	51.25	2010-247-08-52-04	-17.37	-174	79	136	69	SKKSac	5-20s	0.95	-46	15	1.34	0.39	12.83	2.08	good
BI.GHVR	34.48	51.25	2010-336-03-12-09	-6	149.98	90	101	33	SKSac	4-25s	Null	Null	Null	Null	Null	-6.8	0	fairNull
BI.GHVR	34.48	51.25	2010-347-01-14-42	-6.53	155.65	87	106	135	SKSac	5-20s	0.98	-32	35	0.84	0.7	11.95	3.47	fair
BI.GHVR	34.48	51.25	2011-009-10-03-43	-19.16	168.31	92	123	22	SKKSac	5-20s	Null	Null	Null	Null	Null	16.24	7.17	goodNull
BI.GHVR	34.48	51.25	2011-052-10-57-52	-26.14	178.39	94	134	558	SKKSac	4-25s	0.9	-77	9	1.44	1.08	-6.8	0	fair
BI.GHVR	34.48	51.25	2011-065-12-31-59	-18.02	-69.36	271	125	118	SKSac	5-20s	Null	Null	Null	Null	Null	10.75	4.67	goodNull
BI.GHVR	34.48	51.25	2011-065-14-32-36	-56.42	-27.06	216	112	87	SKKSac	5-20s	0.95	-67	71	1.56	2.46	8.36	4.21	fair
BI.GHVR	34.48	51.25	2011-065-14-32-36	-56.42	-27.06	216	112	88	SKSac	4-25s	0.92	58	21	1.03	0.72	-6.8	0	fair
BI.GHVR	34.48	51.25	2011-097-13-11-22	17.21	-94.34	322	119	166	SKSac	5-20s	0.97	-70	27	0.74	0.66	2.92	2.59	fair
BI.GHVR	34.48	51.25	2011-215-22-39-23	-5.04	148.16	90	99	10	SKSac	4-25s	0.91	-34	33	0.51	0.62	-6.8	0	good
BI.GHVR	34.48	51.25	2011-236-23-06-17	-18.16	167.73	91	122	13	SKKSac	5-20s	0.95	-27	51	0.9	1.53	10.19	3.98	fair
BI.GHVR	34.48	51.25	2011-287-03-35-14	-6.57	147.88	92	99	37	SKSac	4-25s	Null	Null	Null	Null	Null	-6.8	0	fairNull
BI.GHVR	34.48	51.25	2011-300-00-15-24	-17.94	-179.53	83	132	602	PKSbc	5-20s	0.99	-61	47	0.46	1.29	8.67	5.55	fair
BI.GHVR	34.48	51.25	2011-348-05-04-58	-7.55	146.81	93	99	135	SKSac	5-20s	0.99	-12	67	1.04	2.66	11.43	5.86	fair
BI.GHVR	34.48	51.25	2012-045-08-19-55	-10.39	161.1	88	112	51	SKKSac	5-20s	0.96	-36	47	0.96	2.93	6.65	3.4	fair
BI.GHVR	34.48	51.25	2012-080-17-56-18	-3.81	140.27	94	91	66	SKSac	5-20s	Null	Null	Null	Null	Null	15.31	6.6	goodNull
BI.GHVR	34.48	51.25	2012-081-22-15-06	-6.24	145.96	92	97	118	SKSac	5-20s	0.99	-10	74	0.96	2.85	9.47	5.71	fair
BI.GHVR	34.48	51.25	2012-105-10-56-19	-57.68	-65.31	221	132	15	PKSbc	5-20s	0.98	87	19	1.08	0.44	10.19	2.59	fair
BI.GHVR	34.48	51.25	2012-149-05-07-23	-28.04	-63.09	257	124	586	SKSac	5-20s	0.96	-65	29	0.72	1.31	8.52	3.87	fair
BI.GHVR	34.48	51.25	2012-188-02-28-22	-14.66	167.34	88	120	160	SKKSac	4-25s	0.92	-78	25	1.33	1.23	-6.8	0	fair
BI.GHVR	34.48	51.25	2012-189-03-35-28	-4.65	153.3	87	103	35	SKSac	4-25s	0.9	-67	11	1.23	0.46	-6.8	0	fair
BI.GHVR	34.48	51.25	2012-207-11-20-27	-9.69	159.73	88	111	20	SKSac	5-20s	0.99	-44	29	1.42	0.84	7.29	2.36	fair
BI.GHVR	34.48	51.25	2012-210-20-03-56	-4.65	153.17	87	102	41	SKSac	4-25s	0.95	-69	10	1.23	0.46	-6.8	0	good
BI.GHVR	34.48	51.25	2012-215-09-56-41	-4.65	153.28	87	103	46	SKSac	5-20s	0.97	-69	18	1.32	0.62	10.23	2.37	fair
BI.GHVR	34.48	51.25	2012-304-02-49-02	52.37	-131.9	2	93	9	SKSac	4-25s	0.95	-78	7	1.64	1.03	-6.8	0	fair
BI.GHVR	34.48	51.25	2012-312-16-35-46	13.99	-91.89	318	120	24	SKSac	5-20s	0.98	-79	22	0.6	0.38	4.55	3.47	fair
BI.GHVR	34.48	51.25	2013-096-04-42-35	-3.52	138.48	94	90	66	SKSac	4-25s	0.94	-27	36	0.51	0.82	-6.8	0	fair
BI.GHVR	34.48	51.25	2013-104-01-32-22	-6.47	154.61	88	105	31	SKSac	5-20s	0.94	-49	38	0.9	1.31	6.24	3.34	fair
BI.GHVR	34.48	51.25	2013-188-20-30-06	-6.03	149.71	90	100	56	SKSac	5-20s	0.95	-68	63	0.76	1.39	7.41	4.43	fair
BI.GHVR	34.48	51.25	2013-207-21-32-59	-57.91	-23.84	214	111	13	SKSac	5-20s	0.93	78	29	1.14	1.23	7.05	2.85	fair
BI.GHVR	34.48	51.25	2013-304-23-03-59	-30.29	-71.52	258	132	27	PKSbc	5-20s	0.96	-28	72	0.92	3.1	7.73	4.73	fair
BI.GHVR	34.48	51.25	2013-327-07-48-32	-17.12	-176.54	80	134	371	SKKSac	4-25s	0.95	-75	8	1.33	0.36	-6.8	0	fair
BI.GHVR	34.48	51.25	2014-184-19-50-07	-30.46	-176.45	98	140	35	SKKSac	5-20s	Null	Null	Null	Null	Null	14.13	8.28	goodNull
BI.GHVR	34.48	51.25	2014-188-11-23-54	14.72	-92.46	319	120	53	SKSac	4-25s	0.95	-66	17	1.23	0.77	-6.8	0	fair
BI.GHVR	34.48	51.25	2014-287-03-51-34	12.53	-88.12	313	119	40	SKSac	5-20s	0.95	-79	16	0.48	0.28	3.74	3.07	fair
BI.GHVR	34.48	51.25	2015-023-03-47-27	-17.03	168.52	90	122	219	SKKSac	5-20s	0.98	-69	21	0.72	3.3	10.16	5.89	fair
BI.GHVR	34.48	51.25	2015-023-03-47-27	-17.03	168.52	90	122	219	SKSac	5-20s	Null	Null	Null	Null	Null	10.7	6.75	goodNull
BI.GHVR	34.48	51.25	2015-047-22-00-53	-55.52	-28.26	217	112	13	SKKSac	5-20s	0.96	-64	70	1.7	2.32	9.91	4.94	fair
BI.GHVR	34.48	51.25	2015-140-00-30-54	-19.3	-175.52	82	136	203	SKKSac	5-20s	0.97	-59	32	1.02	0.83	5.71	1.99	fair
BI.GHVR	34.48	51.25	2015-150-17-18-35	-15.72	-173.38	76	136	10	SKKSac	4-25s	0.91	-77	12	1.03	0.41	-6.8	0	good
BI.GHVR	34.48	51.25	2015-181-03-39-29	-5.45	151.55	89	102	43	SKSac	4-25s	0.92	-50	21	1.13	0.56	-6.8	0	fair
BI.GHVR	34.48	51.25	2015-191-04-12-42	-9.31	158.4	88	109	12	SKSac	5-20s	0.98	-48	44	0.42	2.51	12.06	7.19	good
BI.GHVR	34.48	51.25	2015-224-18-49-24	-9.33	157.88	88	109	6	SKKSac	5-20s	0.98	-43	21	0.34	0.22	7.46	6.06	fair
BI.GHVR	34.48	51.25	2015-315-01-54-38	-29.51	-72.01	259	132	12	SKKSac	5-20s	Null	Null	Null	Null	Null	8.43	3.86	fairNull
BI.GHVR	34.48	51.25	2016-039-16-19-12	-6.62	154.74	88	105	29	SKSac	4-25s	Null	Null	Null	Null	Null	-6.8	0	fairNull
BI.GHVR	34.48	51.25	2016-041-00-33-05	-30.57	-71.58	258	132	29	PKSbc	5-20s	0.97	-76	22	0.54	1.45	9.7	5.5	fair
BI.GHVR	34.48	51.25	2016-098-03-32-53	-13.98	166.59	88	119	27	SKSac	5-20s	0.95	-29	49	1.24	1.83	7.23	2.82	fair
BI.GHVR	34.48	51.25	2016-110-05-25-39	-55.73	-27.23	217	112	14	SKKSac	5-20s	0.95	-87	24	0.64	0.44	4.74	3.12	fair
BI.GHVR	34.48	51.25	2016-110-05-25-39	-55.73	-27.23	217	112	14	SKSac	4-25s	0.9	59	21	1.44	1.28	-6.8	0	fair
BI.GHVR	34.48	51.25	2016-113-03-03-41	-0.29	-80.5	296	124	10	SKSac	5-20s	Null	Null	Null	Null	Null	6.23	3.77	goodNull
BI.GHVR	34.48	51.25	2016-119-19-33-24	-16.04	167.38	89	120	24	SKKSac	5-20s	0.98	82	31	1.54	2.03	13.05	5.67	fair
BI.GHVR	34.48	51.25	2016-166-13-49-22	-18.76	168.83	91	123	111	SKKSac	4-25s	0.9	-15	25	0.62	0.62	-6.8	0	fair
BI.GHVR	34.48	51.25	2016-166-13-49-22	-18.76	168.83	91	123	111	SKSac	4-25s	Null	Null	Null	Null	Null	-6.8	0	fairNull
BI.GHVR	34.48	51.25	2016-207-19-38-44	-2.95	147.97	89	97	7	SKSac	4-25s	0.9	-19	39	1.13	1.44	-6.8	0	fair
BI.GHVR	34.48	51.25	2016-244-03-11-34	-3.68	152.79	86	102	476	SKSac	4-25s	0.91	-82	27	0.82	0.82	-6.8	0	fair
BI.GHVR	34.48	51.25	2016-261-01-20-17	-2.08	140.57	92	91	9	SKSac	4-25s	0.91	-31	32	0.41	0.51	-6.8	0	fair
BI.GHVR	34.48	51.25	2016-291-06-14-58	-6	148.89	91	100	42	SKSac	4-25s	Null	Null	Null	Null	Null	-6.8	0	fairNull
BI.GHVR	34.48	51.25	2016-302-05-26-55	-4.67	153.22	87	102	45	SKSac	4-25s	0.93	-62	18	0.72	0.36	-6.8	0	good
BI.GRMI	38.81	47.89	2004-255-21-52-38	-57.98	-25.34	214	114	63	SKKSac	5-20s	Null	Null	Null	Null	Null	31.35	13.25	goodNull
BI.GRMI	38.81	47.89	2005-028-15-46-45	-1.09	-81.16	296	120	10	SKSac	5-20s	Null	Null	Null	Null	Null	12.64	5.49	goodNull
BI.GRMI	38.81	47.89	2005-038-20-02-17	-4.53	153.19	84	105	36	SKSac	5-20s	Null	Null	Null	Null	Null	16.67	10.64	goodNull
BI.GRMI	38.81	47.89	2005-164-22-44-33	-19.99	-69.2	270	123	115	SKSac	5-20s	0.98	49	28	0.26	0.46	7.52	6.83	good
BI.GRMI	38.81	47.89	2005-168-06-21-42	40.77	-126.57	356	101	12	SKSac	5-20s	0.97	51	30	0.2	0.44	4.6	4.3	good
BI.GRMI	38.81	47.89	2005-226-02-39-40	-19.78	-68.98	270	123	114	SKKSac	4-25s	0.93	26	18	1.33	0.82	-4.57	0	fair
BI.GRMI	38.81	47.89	2005-302-04-05-56	-45.21	96.9	148	95	8	SKSac	5-20s	Null	Null	Null	Null	Null	8.62	3.77	goodNull
BI.GRMI	38.81	47.89	2005-321-19-26-54	-22.36	-67.89	267	123	147	SKSac	4-25s	0.94	64	24	1.03	0.72	-4.57	0	fair
BI.GRMI	38.81	47.89	2006-049-15-59-22	-5.19	152.05	85	104	44	SKSac	5-20s	Null	Null	Null	Null	Null	10.42	6.65	goodNull
BI.GRMI	38.81	47.89	2006-223-14-30-40	18.54	-101.05	327	116	56	SKKSac	5-20s	0.99	11	26	0.64	0.38	14.26	4.29	good
BI.GRMI	38.81	47.89	2006-223-14-30-40	18.54	-101.05	327	116	56	SKSac	4-25s	0.92	-6	13	1.33	0.56	-4.57	0	fair
BI.GRMI	38.81	47.89	2006-295-08-55-16	-45.73	95.99	148	95	10	SKSac	5-20s	0.98	-10	42	0.76	0.75	9.42	3.94	fair
BI.GRMI	38.81	47.89	2007-115-13-34-14	-14.29	166.86	83	121	55	SKSac	5-20s	Null	Null	Null	Null	Null	10.56	5.87	goodNull
BI.GRMI	38.81	47.89	2007-182-14-34-12	-5.93	130.56	99	88	135	SKSac	4-25s	Null	Null	Null	Null	Null	-4.57	0	fairNull
BI.GRMI	38.81	47.89	2007-187-01-09-19	16.35	-93.99	319	115	113	SKSac	4-25s	0.94	9	23	1.03	0.56	-4.57	0	fair
BI.GRMI	38.81	47.89	2007-202-15-34-52	-22.15	-65.78	266	122	290	SKKSac	4-25s	0.94	48	24	1.03	0.56	-4.57	0	fair
BI.GRMI	38.81	47.89	2007-202-15-34-52	-22.15	-65.78	266	122	290	SKSac	4-25s	0.91	49	18	1.03	0.41	-4.57	0	fair
BI.GRMI	38.81	47.89	2007-253-01-49-11	2.97	-77.96	297	115	15	SKKSac	5-20s	Null	Null	Null	Null	Null	7.04	3.45	goodNull
BI.GRMI	38.81	47.89	2007-273-05-23-34	-49.27	164.12	125	134	10	PKSbc	4-25s	0.9	17	9	1.54	0.67	-4.57	0	fair
BI.GRMI	38.81	47.89	2007-288-12-29-34	-44.8	167.55	118	136	18	PKSbc	4-25s	Null	Null	Null	Null	Null	-4.57	0	fairNull
BI.GRMI	38.81	47.89	2007-288-12-29-34	-44.8	167.55	118	136	18	SKKSac	5-20s	0.96	-16	36	0.54	0.98	7.63	4.36	fair
BI.GRMI	38.81	47.89	2007-289-21-05-43	-25.77	179.53	87	138	509	SKKSac	5-20s	0.96	45	45	0.52	3.5	7.06	4.02	fair
BI.GRMI	38.81	47.89	2007-320-03-13-00	-2.31	-77.84	292	119	123	SKSac	4-25s	Null	Null	Null	Null	Null	-4.57	0	fairNull
BI.GRMI	38.81	47.89	2007-322-05-40-12	-22.64	-66.32	266	122	246	SKSac	5-20s	0.97	41	28	0.88	0.43	7.88	2.56	fair
BI.GRMI	38.81	47.89	2007-347-15-51-27	-15.21	-172.37	68	138	17	PKSbc	5-20s	0.94	44	30	1.24	1.3	7.35	2.99	fair
BI.GRMI	38.81	47.89	2007-350-08-09-17	-22.95	-70.18	268	126	45	SKKSac	4-25s	0.9	19	10	1.44	0.62	-4.57	0	fair
BI.GRMI	38.81	47.89	2007-350-08-09-17	-22.95	-70.18	268	126	45	SKSac	4-25s	0.91	34	31	0.82	0.72	-4.57	0	fair
BI.GRMI	38.81	47.89	2008-043-12-50-18	16.36	-94.3	320	115	83	SKKSac	5-20s	Null	Null	Null	Null	Null	16.34	8.33	goodNull
BI.GRMI	38.81	47.89	2008-043-12-50-18	16.36	-94.3	320	115	83	SKSac	5-20s	0.96	-16	6	1.66	0.38	14.46	1.77	good
BI.GRMI	38.81	47.89	2008-190-09-13-07	-15.99	-71.75	276	123	123	SKKSac	4-25s	0.93	15	4	1.85	0.72	-4.57	0	fair
BI.GRMI	38.81	47.89	2008-239-21-00-36	-7.64	-74.38	285	120	154	SKKSac	5-20s	Null	Null	Null	Null	Null	12.96	7.05	goodNull
BI.GRMI	38.81	47.89	2009-132-01-26-26	-5.66	149.54	87	103	89	SKSac	5-20s	Null	Null	Null	Null	Null	10.94	5.31	goodNull
BI.GRMI	38.81	47.89	2009-144-00-58-02	-31.48	-177.68	93	142	4	SKKSac	5-20s	Null	Null	Null	Null	Null	10.22	4.39	goodNull
BI.GRMI	38.81	47.89	2009-193-06-12-47	-15.04	-70.44	276	121	199	SKSac	4-25s	0.95	49	21	0.82	0.36	-4.57	0	fair
BI.GRMI	38.81	47.89	2009-242-14-51-32	-15.22	-172.57	68	137	11	PKSbc	5-20s	0.98	50	50	0.72	0.84	11.41	5.34	fair
BI.GRMI	38.81	47.89	2009-281-08-28-47	-13.3	165.91	83	120	35	SKKSac	5-20s	0.96	-46	24	0.4	0.46	5.65	4.57	fair
BI.GRMI	38.81	47.89	2009-318-19-44-29	-22.96	-66.64	266	123	220	SKKSac	4-25s	0.92	16	12	1.33	0.62	-4.57	0	fair
BI.GRMI	38.81	47.89	2009-318-19-44-29	-22.96	-66.64	266	123	220	SKSac	4-25s	0.91	53	24	1.13	0.67	-4.57	0	fair
BI.GRMI	38.81	47.89	2009-343-09-46-03	-22.15	170.96	88	129	45	SKKSac	5-20s	0.93	20	36	1.34	1.38	7.56	2.65	fair
BI.GRMI	38.81	47.89	2010-224-11-54-15	-1.27	-77.31	293	118	206	SKSac	5-20s	Null	Null	Null	Null	Null	6.46	7.72	goodNull
BI.GRMI	38.81	47.89	2010-327-09-01-06	-5.96	148.97	88	102	68	SKSac	5-20s	Null	Null	Null	Null	Null	16.16	8.39	goodNull
BI.GRMI	38.81	47.89	2010-342-05-24-35	-56.41	-25.74	216	113	29	SKSac	5-20s	0.99	-46	9	2.04	1.33	10.64	3.76	fair
BI.GRMI	38.81	47.89	2011-065-12-31-59	-18.02	-69.36	272	122	118	SKKSac	5-20s	0.96	27	19	1.36	0.73	12.91	2.62	fair
BI.GRMI	38.81	47.89	2011-065-12-31-59	-18.02	-69.36	272	122	118	SKSac	5-20s	0.97	23	41	1.42	1.63	6.91	2.85	fair
BI.GRMI	38.81	47.89	2011-065-14-32-36	-56.42	-27.06	216	114	88	SKSac	4-25s	Null	Null	Null	Null	Null	-4.57	0	fairNull
BI.GRMI	38.81	47.89	2011-097-13-11-22	17.21	-94.34	320	114	166	SKKSac	5-20s	0.99	4	17	1.22	0.62	3.27	2.01	fair
BI.GRMI	38.81	47.89	2011-097-13-11-22	17.21	-94.34	320	114	166	SKSac	5-20s	0.96	28	29	1.06	0.84	5.02	2.46	good
BI.GRMI	38.81	47.89	2011-167-00-03-35	-5.93	151.04	86	104	16	SKSac	5-20s	0.97	-72	19	0.88	1.83	8.88	4.29	fair
BI.GRMI	38.81	47.89	2011-171-16-36-01	-21.7	-68.23	268	123	128	SKKSac	5-20s	0.98	16	19	1.16	0.73	16.18	4.34	fair
BI.GRMI	38.81	47.89	2011-171-16-36-01	-21.7	-68.23	268	123	128	SKSac	5-20s	0.99	47	23	0.3	0.26	6.84	5.3	fair
BI.GRMI	38.81	47.89	2011-236-17-46-11	-7.64	-74.53	285	120	147	SKSac	4-25s	Null	Null	Null	Null	Null	-4.57	0	fairNull
BI.GRMI	38.81	47.89	2011-246-04-48-57	-56.45	-26.85	216	114	84	SKSac	5-20s	0.98	-43	48	1.76	1.81	7.99	3.67	fair
BI.GRMI	38.81	47.89	2012-021-18-47-11	14.87	-93	318	115	45	SKSac	4-25s	0.9	6	13	0.92	0.26	-4.57	0	good
BI.GRMI	38.81	47.89	2012-023-16-04-52	-36.41	-73.03	254	134	20	PKSbc	5-20s	0.95	34	29	1.6	0.77	4.6	2.06	fair
BI.GRMI	38.81	47.89	2012-102-22-55-10	18.23	-102.69	328	117	20	SKSac	5-20s	0.95	-15	14	1.78	0.94	8.72	3	fair
BI.GRMI	38.81	47.89	2012-105-10-56-19	-57.68	-65.31	223	134	15	PKSbc	4-25s	0.96	12	20	0.72	0.41	-4.57	0	good
BI.GRMI	38.81	47.89	2012-108-03-50-15	-32.62	-71.36	258	131	29	PKSbc	4-25s	0.91	41	40	0.82	1.13	-4.57	0	fair
BI.GRMI	38.81	47.89	2012-108-07-13-49	-5.46	147.12	88	101	198	SKSac	5-20s	Null	Null	Null	Null	Null	16.55	7.07	goodNull
BI.GRMI	38.81	47.89	2012-135-10-00-40	-17.68	-69.59	273	122	105	SKSac	5-20s	0.95	21	16	1.58	0.94	9.29	2.73	fair
BI.GRMI	38.81	47.89	2012-149-05-07-23	-28.04	-63.09	259	123	587	SKSac	4-25s	0.94	27	40	0.72	1.49	-4.57	0	fair
BI.GRMI	38.81	47.89	2012-174-04-31-17	-54.36	158.79	133	132	14	PKSbc	4-25s	0.91	3	14	0.92	0.26	-4.57	0	fair
BI.GRMI	38.81	47.89	2012-188-02-28-22	-14.66	167.34	83	122	160	SKKSac	5-20s	0.97	-86	7	1.7	0.75	13.79	4.31	fair
BI.GRMI	38.81	47.89	2012-210-20-03-56	-4.65	153.17	84	105	41	SKSac	5-20s	Null	Null	Null	Null	Null	14.73	9.86	goodNull
BI.GRMI	38.81	47.89	2012-304-02-49-02	52.37	-131.9	360	89	9	SKSac	4-25s	0.91	-73	6	1.03	0.31	-4.57	0	fair
BI.GRMI	38.81	47.89	2012-312-16-35-46	13.99	-91.89	316	115	24	SKKSac	5-20s	Null	Null	Null	Null	Null	15	6.74	goodNull
BI.GRMI	38.81	47.89	2012-312-16-35-46	13.99	-91.89	316	115	24	SKSac	5-20s	0.94	-3	32	0.72	0.55	7.62	3.58	fair
BI.GRMI	38.81	47.89	2012-313-02-01-50	49.23	-128.48	358	92	13	SKSac	5-20s	Null	Null	Null	Null	Null	8.21	3.66	goodNull
BI.GRMI	38.81	47.89	2012-356-22-28-08	-14.34	167.29	83	122	200	SKKSac	5-20s	0.94	45	30	0.48	0.7	4.48	3.54	fair
BI.GRMI	38.81	47.89	2013-037-00-07-22	-10.86	165.25	81	118	11	SKSac	5-20s	0.98	57	58	0.44	2.15	10.92	6.75	fair
BI.GRMI	38.81	47.89	2013-224-04-16-47	-30.63	-179.68	93	140	340	PKSdf	5-20s	0.95	27	57	0.8	1.71	6.78	3.78	fair
BI.GRMI	38.81	47.89	2013-224-09-49-32	-5.4	-81.93	293	124	10	SKKSac	5-20s	0.99	-19	31	0.38	0.44	7.82	5.74	fair
BI.GRMI	38.81	47.89	2013-289-10-30-58	-6.45	154.93	84	107	35	SKSac	5-20s	0.99	65	65	0.86	1.4	13.13	5.67	fair
BI.GRMI	38.81	47.89	2013-327-07-48-32	-17.12	-176.54	74	136	371	SKKSac	4-25s	Null	Null	Null	Null	Null	-4.57	0	fairNull
BI.GRMI	38.81	47.89	2014-001-16-03-29	-13.86	167.25	83	121	187	SKSac	5-20s	Null	Null	Null	Null	Null	9.39	4.37	fairNull
BI.GRMI	38.81	47.89	2014-135-08-16-34	6.43	144.94	81	91	11	SKSac	5-20s	0.98	43	43	0.44	2	14	6.32	fair
BI.GRMI	38.81	47.89	2014-188-11-23-54	14.72	-92.46	317	115	53	SKKSac	5-20s	0.93	14	28	0.88	2.04	6.97	3.3	fair
BI.GRMI	38.81	47.89	2014-188-11-23-54	14.72	-92.46	317	115	53	SKSac	4-25s	0.94	-5	19	0.72	0.31	-4.57	0	good
BI.GRMI	38.81	47.89	2014-210-10-46-14	17.68	-95.65	322	114	107	SKKSac	5-20s	0.97	33	33	1.3	1.6	10.52	4	fair
BI.GRMI	38.81	47.89	2014-210-10-46-14	17.68	-95.65	322	114	107	SKSac	5-20s	0.96	13	36	0.58	2.49	7.53	4.81	fair
BI.GRMI	38.81	47.89	2014-215-00-22-03	0.83	146.17	84	96	13	SKSac	4-25s	0.91	-22	14	1.85	1.18	-4.57	0	fair
BI.GRMI	38.81	47.89	2014-235-22-32-23	-32.7	-71.44	258	131	32	PKSbc	5-20s	0.93	33	37	0.72	1.38	5.72	3.11	fair
BI.GRMI	38.81	47.89	2014-236-23-21-45	-14.6	-73.57	278	123	101	SKKSac	5-20s	Null	Null	Null	Null	Null	9.77	6.94	goodNull
BI.GRMI	38.81	47.89	2015-023-03-47-27	-17.03	168.52	85	124	219	SKKSac	5-20s	Null	Null	Null	Null	Null	10.05	6.83	goodNull
BI.GRMI	38.81	47.89	2015-023-03-47-27	-17.03	168.52	85	124	220	SKKSac	4-25s	Null	Null	Null	Null	Null	-4.57	0	fairNull
BI.GRMI	38.81	47.89	2015-023-03-47-27	-17.03	168.52	85	124	220	SKSac	4-25s	Null	Null	Null	Null	Null	-4.57	0	fairNull
BI.GRMI	38.81	47.89	2015-224-18-49-24	-9.33	157.88	85	111	6	SKSac	5-20s	Null	Null	Null	Null	Null	11.64	7	goodNull
BI.GRMI	38.81	47.89	2015-250-08-46-09	-24.24	179.13	85	136	535	PKSbc	5-20s	0.97	-40	20	1.06	0.41	7.15	1.98	fair
BI.GRMI	38.81	47.89	2015-259-14-03-22	-6.01	151.48	86	104	6	SKSac	5-20s	Null	Null	Null	Null	Null	24.28	14.76	goodNull
BI.GRMI	38.81	47.89	2015-260-03-55-15	-31.42	-71.69	259	131	27	PKSbc	5-20s	0.96	16	14	1.28	0.59	12.72	2.77	good
BI.GRMI	38.81	47.89	2015-260-04-10-27	-31.52	-71.8	259	131	23	PKSbc	5-20s	0.96	23	22	1.28	0.68	10.87	2.59	fair
BI.GRMI	38.81	47.89	2015-261-09-10-44	-32.37	-72.23	258	132	8	PKSbc	4-25s	0.95	33	28	0.82	0.56	-4.57	0	fair
BI.GRMI	38.81	47.89	2015-262-05-06-47	-29.64	-72.08	261	130	6	PKSbc	4-25s	0.91	60	8	0.92	0.31	-4.57	0	good
BI.GRMI	38.81	47.89	2015-264-05-39-34	-31.58	-71.74	259	131	30	PKSbc	4-25s	0.96	23	28	0.72	0.62	-4.57	0	fair
BI.GRMI	38.81	47.89	2015-264-17-40-00	-31.73	-71.38	259	131	35	PKSbc	5-20s	0.96	19	42	0.84	1.13	7.69	3.4	fair
BI.GRMI	38.81	47.89	2015-265-07-13-00	-31.44	-71.27	259	130	58	PKSbc	4-25s	0.94	50	11	0.82	0.26	-4.57	0	good
BI.GRMI	38.81	47.89	2015-293-21-52-02	-14.86	167.3	83	122	135	SKSac	5-20s	0.99	74	8	1.4	0.52	57.01	7.38	fair
BI.GRMI	38.81	47.89	2015-311-07-04-31	-29.46	-72.3	262	130	13	PKSbc	5-20s	0.98	16	49	0.76	1.22	10.55	4.59	fair
BI.GRMI	38.81	47.89	2015-311-07-04-31	-29.46	-72.3	262	130	13	SKKSac	5-20s	0.95	19	64	1.32	2.7	5.55	2.84	fair
BI.GRMI	38.81	47.89	2015-328-22-45-38	-10.54	-70.94	280	119	606	SKKSac	5-20s	Null	Null	Null	Null	Null	11.77	5.26	fairNull
BI.GRMI	38.81	47.89	2016-041-00-33-05	-30.57	-71.58	260	130	29	PKSbc	4-25s	0.92	36	30	0.82	0.56	-4.57	0	fair
BI.GRMI	38.81	47.89	2016-058-21-29-43	-51.79	139.6	134	120	10	SKKSac	5-20s	0.96	1	35	0.72	1.53	8.02	3.53	fair
BI.GRMI	38.81	47.89	2016-106-14-11-26	13.4	-92.37	316	116	22	SKKSac	5-20s	0.98	2	30	0.88	0.74	8.53	2.81	fair
BI.GRMI	38.81	47.89	2016-139-16-46-43	0.49	-79.62	296	118	29	SKSac	4-25s	0.95	1	42	0.51	1.9	-4.57	0	fair
BI.KHMZ	33.74	49.96	2009-018-14-11-48	-30.2	-177.95	99	139	33	SKKSac	5-20s	0.99	-50	28	0.44	0.42	4.67	3.93	fair
BI.KHMZ	33.74	49.96	2009-089-07-13-07	56.55	-152.74	12	88	21	SKSac	4-25s	Null	Null	Null	Null	Null	0.02	0	fairNull
BI.KHMZ	33.74	49.96	2009-091-03-54-58	-3.52	144.1	91	95	10	SKSac	5-20s	Null	Null	Null	Null	Null	12.88	6.81	goodNull
BI.KHMZ	33.74	49.96	2009-116-00-06-53	-30.3	-178.58	99	139	131	SKKSac	5-20s	Null	Null	Null	Null	Null	13	5.39	goodNull
BI.KHMZ	33.74	49.96	2009-123-16-21-45	14.55	-91.14	316	119	108	SKSac	5-20s	0.97	-28	65	1.04	1.55	11.4	5.48	fair
BI.KHMZ	33.74	49.96	2009-144-00-58-02	-31.48	-177.68	100	140	4	SKKSac	5-20s	0.95	-39	38	0.64	0.78	8.42	3.44	fair
BI.KHMZ	33.74	49.96	2009-217-08-31-40	-45.55	166.36	124	131	10	PKSbc	4-25s	0.9	21	11	1.03	0.67	0.02	0	fair
BI.KHMZ	33.74	49.96	2009-222-17-46-23	-3.13	143.2	91	94	10	SKSac	4-25s	0.95	-15	28	0.92	0.92	0.02	0	fair
BI.KHMZ	33.74	49.96	2009-288-12-11-16	-3.06	139.54	93	91	106	SKSac	4-25s	0.95	-11	6	1.33	0.56	0.02	0	fair
BI.KHMZ	33.74	49.96	2009-318-19-44-29	-22.96	-66.64	263	124	220	SKKSac	5-20s	0.99	21	56	0.44	1.51	11.12	5.83	fair
BI.KHMZ	33.74	49.96	2009-343-09-46-03	-22.15	170.96	93	127	45	SKKSac	5-20s	0.97	-27	54	0.64	1.7	9.98	4.44	fair
BI.KHMZ	33.74	49.96	2010-044-02-34-28	-21.9	-174.77	85	139	11	SKKSac	5-20s	0.95	-25	43	0.98	1.35	6.69	3.39	fair
BI.KHMZ	33.74	49.96	2010-063-22-39-26	-22.23	-68.33	265	125	114	SKKSac	5-20s	0.95	74	13	2.1	1.12	9.55	3.53	fair
BI.KHMZ	33.74	49.96	2010-079-14-00-49	-3.36	152.25	86	102	415	SKSac	4-25s	0.94	-15	7	0.92	0.56	0.02	0	fair
BI.KHMZ	33.74	49.96	2010-123-23-09-44	-38.07	-73.45	248	135	19	SKKSac	5-20s	Null	Null	Null	Null	Null	38.86	17.22	goodNull
BI.KHMZ	33.74	49.96	2010-191-11-43-32	11.14	146	77	89	13	SKSac	4-25s	0.94	-40	15	0.62	0.31	0.02	0	fair
BI.KHMZ	33.74	49.96	2010-193-00-11-21	-22.15	-68.22	265	125	115	SKKSac	5-20s	0.97	73	32	1.44	1.03	9.53	4.67	fair
BI.KHMZ	33.74	49.96	2010-193-00-11-21	-22.15	-68.22	265	125	115	SKSac	5-20s	0.98	2	3	1.96	0.6	20.3	5.32	fair
BI.KHMZ	33.74	49.96	2010-199-13-04-09	-5.97	150.43	89	102	28	SKSac	4-25s	0.93	-11	4	1.33	0.56	0.02	0	fair
BI.KHMZ	33.74	49.96	2010-224-11-54-15	-1.27	-77.31	292	121	206	SKSac	5-20s	Null	Null	Null	Null	Null	9.03	10.41	goodNull
BI.KHMZ	33.74	49.96	2010-247-08-52-04	-17.37	-174	79	137	69	SKKSac	5-20s	0.98	86	52	1.26	1.28	10.1	6.21	fair
BI.KHMZ	33.74	49.96	2011-038-19-53-42	-7.15	155.18	88	107	415	SKKSac	5-20s	Null	Null	Null	Null	Null	17.07	7.64	goodNull
BI.KHMZ	33.74	49.96	2011-038-19-53-42	-7.15	155.18	88	107	415	SKSac	4-25s	Null	Null	Null	Null	Null	0.02	0	fairNull
BI.KHMZ	33.74	49.96	2011-052-10-57-52	-26.14	178.39	95	135	558	SKKSac	5-20s	0.99	-14	58	0.68	1.08	8.55	4.7	fair
BI.KHMZ	33.74	49.96	2011-065-12-31-59	-18.02	-69.36	270	124	118	SKKSac	5-20s	0.96	9	69	1.88	2.14	7.22	4.53	fair
BI.KHMZ	33.74	49.96	2011-065-12-31-59	-18.02	-69.36	270	124	118	SKSac	5-20s	Null	Null	Null	Null	Null	13.26	8.11	goodNull
BI.KHMZ	33.74	49.96	2011-065-14-32-36	-56.42	-27.06	215	111	87	SKKSac	5-20s	Null	Null	Null	Null	Null	15.5	8.33	goodNull
BI.KHMZ	33.74	49.96	2011-065-14-32-36	-56.42	-27.06	215	111	88	SKSac	4-25s	Null	Null	Null	Null	Null	0.02	0	fairNull
BI.KHMZ	33.74	49.96	2011-076-02-48-00	-17.27	167.83	90	122	17	SKSac	5-20s	0.98	-21	62	1.02	2.59	7.28	4.22	fair
BI.KHMZ	33.74	49.96	2011-097-13-11-22	17.21	-94.34	320	119	166	SKKSac	5-20s	0.97	2	28	0.64	0.46	5.51	3.83	good
BI.KHMZ	33.74	49.96	2011-097-13-11-22	17.21	-94.34	320	119	166	SKSac	5-20s	0.99	-29	12	1.64	1.1	22.74	5.51	fair
BI.KHMZ	33.74	49.96	2011-152-12-55-22	-37.58	-73.69	248	135	21	PKSbc	4-25s	Null	Null	Null	Null	Null	0.02	0	fairNull
BI.KHMZ	33.74	49.96	2011-171-16-36-01	-21.7	-68.23	266	125	128	SKSac	4-25s	Null	Null	Null	Null	Null	0.02	0	fairNull
BI.KHMZ	33.74	49.96	2011-192-07-15-43	-29.49	-176.58	97	140	11	SKKSac	4-25s	Null	Null	Null	Null	Null	0.02	0	fairNull
BI.KHMZ	33.74	49.96	2011-215-22-39-23	-5.04	148.16	90	100	10	SKSac	4-25s	Null	Null	Null	Null	Null	0.02	0	fairNull
BI.KHMZ	33.74	49.96	2011-236-17-46-11	-7.64	-74.53	284	123	147	SKKSac	5-20s	0.99	44	55	0.4	2.06	14.95	7.3	fair
BI.KHMZ	33.74	49.96	2011-236-17-46-11	-7.64	-74.53	284	123	147	SKSac	4-25s	Null	Null	Null	Null	Null	0.02	0	fairNull
BI.KHMZ	33.74	49.96	2011-246-04-48-57	-56.45	-26.85	215	111	84	SKKSac	5-20s	Null	Null	Null	Null	Null	11.69	7.58	goodNull
BI.KHMZ	33.74	49.96	2011-246-22-55-40	-20.67	169.72	92	126	185	SKKSac	5-20s	0.98	-72	33	1.46	1.1	7.83	3.56	fair
BI.KHMZ	33.74	49.96	2011-252-19-41-34	49.53	-126.89	358	97	22	SKSac	5-20s	Null	Null	Null	Null	Null	12.51	6.58	goodNull
BI.KHMZ	33.74	49.96	2011-287-03-35-14	-6.57	147.88	91	100	37	SKSac	4-25s	0.95	-9	3	1.54	0.41	0.02	0	good
BI.KHMZ	33.74	49.96	2011-291-05-05-06	-5.79	151.04	89	102	26	SKSac	4-25s	0.9	-11	7	1.13	0.72	0.02	0	fair
BI.KHMZ	33.74	49.96	2011-348-05-04-58	-7.55	146.81	93	100	135	SKSac	4-25s	0.91	-5	3	2.15	0.92	0.02	0	fair
BI.KHMZ	33.74	49.96	2012-009-04-07-14	-10.62	165.16	85	117	28	SKSac	5-20s	0.98	76	62	1.6	1.74	11.17	4.4	fair
BI.KHMZ	33.74	49.96	2012-021-18-47-11	14.87	-93	318	120	45	SKKSac	5-20s	0.97	-3	45	0.72	1.65	8.03	4.17	fair
BI.KHMZ	33.74	49.96	2012-021-18-47-11	14.87	-93	318	120	45	SKSac	4-25s	0.91	40	20	1.44	1.44	0.02	0	fair
BI.KHMZ	33.74	49.96	2012-081-22-15-06	-6.24	145.96	92	98	118	SKSac	4-25s	0.91	-9	4	1.54	0.56	0.02	0	good
BI.KHMZ	33.74	49.96	2012-093-17-36-42	16.39	-98.32	324	122	9	SKSac	5-20s	0.96	8	30	0.68	0.52	10.17	3.95	fair
BI.KHMZ	33.74	49.96	2012-108-07-13-49	-5.46	147.12	91	99	198	SKSac	4-25s	0.96	-11	9	1.03	0.67	0.02	0	fair
BI.KHMZ	33.74	49.96	2012-135-10-00-40	-17.68	-69.59	271	124	105	SKSac	5-20s	0.97	45	50	0.52	3.5	7.83	4.11	fair
BI.KHMZ	33.74	49.96	2012-207-11-20-27	-9.69	159.73	87	112	20	SKKSac	5-20s	0.97	-14	33	1.7	1.43	11.2	3.93	fair
BI.KHMZ	33.74	49.96	2012-210-20-03-56	-4.65	153.17	87	104	41	SKSac	4-25s	0.95	-15	5	1.03	0.41	0.02	0	fair
BI.KHMZ	33.74	49.96	2012-215-09-38-30	-8.41	-74.26	283	123	144	SKKSac	5-20s	0.97	24	7	2.06	0.86	11.19	3.3	fair
BI.KHMZ	33.74	49.96	2012-215-09-56-41	-4.65	153.28	86	104	46	SKSac	5-20s	0.98	-17	46	1.12	1.22	8.01	4	fair
BI.KHMZ	33.74	49.96	2012-298-00-45-32	10.09	-85.3	307	119	17	SKSac	5-20s	Null	Null	Null	Null	Null	13.22	8.01	goodNull
BI.KHMZ	33.74	49.96	2012-312-16-35-46	13.99	-91.89	316	120	24	SKSac	5-20s	Null	Null	Null	Null	Null	22.88	8.56	goodNull
BI.KHMZ	33.74	49.96	2012-319-19-02-06	-29.12	-71.19	258	130	63	SKKSac	5-20s	Null	Null	Null	Null	Null	19.55	6.8	goodNull
BI.KHMZ	33.74	49.96	2012-324-09-44-34	-5.71	151.6	88	103	13	SKSac	4-25s	0.91	-16	8	1.03	0.51	0.02	0	fair
BI.KHMZ	33.74	49.96	2012-356-22-28-08	-14.34	167.29	87	120	201	SKKSac	4-25s	Null	Null	Null	Null	Null	0.02	0	fairNull
BI.KHMZ	33.74	49.96	2013-037-00-07-22	-10.86	165.25	85	117	11	SKSac	5-20s	0.98	-14	52	1.82	2.2	8.46	4.56	fair
BI.KHMZ	33.74	49.96	2013-069-22-51-50	-6.6	148.17	91	100	28	SKSac	4-25s	0.94	-9	3	1.74	0.56	0.02	0	fair
BI.KHMZ	33.74	49.96	2013-106-22-55-26	-3.21	142.54	91	94	13	SKSac	5-20s	Null	Null	Null	Null	Null	17.32	9.92	goodNull
BI.KHMZ	33.74	49.96	2013-113-23-14-40	-3.9	152.13	86	102	10	SKSac	5-20s	0.98	-11	10	1.94	1.15	14.12	5.6	fair
BI.KHMZ	33.74	49.96	2013-116-06-53-28	-28.68	-178.92	97	138	351	SKKSac	4-25s	0.9	-8	16	0.92	0.67	0.02	0	fair
BI.KHMZ	33.74	49.96	2013-207-21-32-59	-57.91	-23.84	213	110	13	SKSac	5-20s	0.95	-47	75	1.42	2.6	9.72	5.89	fair
BI.KHMZ	33.74	49.96	2013-240-02-54-41	-27.78	179.63	96	137	478	SKKSac	5-20s	0.99	-77	9	1.48	0.9	15.14	6.3	fair
BI.KHMZ	33.74	49.96	2014-001-16-03-29	-13.86	167.25	87	120	187	SKSac	4-25s	0.91	-11	5	1.85	0.92	0.02	0	fair
BI.KHMZ	33.74	49.96	2014-033-09-26-37	-32.91	-177.88	103	140	44	SKKSac	5-20s	0.98	4	4	2.14	1.29	10.91	3.95	fair
BI.KHMZ	33.74	49.96	2014-038-08-40-13	-15.07	167.37	88	121	122	SKKSac	5-20s	0.99	-80	11	1.12	2.9	8.23	5.1	fair
BI.KHMZ	33.74	49.96	2014-038-08-40-13	-15.07	167.37	88	121	122	SKSac	4-25s	Null	Null	Null	Null	Null	0.02	0	fairNull
BI.KHMZ	33.74	49.96	2016-039-16-19-12	-6.62	154.74	87	106	29	SKSac	4-25s	0.91	-20	12	0.92	0.56	0.02	0	good
BI.KHMZ	33.74	49.96	2016-087-18-01-30	52.17	-168.66	23	88	16	SKSac	4-25s	0.94	-56	15	1.33	1.28	0.02	0	fair
BI.KHMZ	33.74	49.96	2016-094-08-23-52	-14.32	166.86	88	120	26	SKSac	5-20s	Null	Null	Null	Null	Null	19.98	8.49	goodNull
BI.KHMZ	33.74	49.96	2016-098-03-32-53	-13.98	166.59	87	120	27	SKSac	5-20s	1	35	38	0.42	0.8	27.01	6.96	fair
BI.KHMZ	33.74	49.96	2016-110-05-25-39	-55.73	-27.23	216	111	14	SKKSac	4-25s	Null	Null	Null	Null	Null	0.02	0	fairNull
BI.KHMZ	33.74	49.96	2016-110-05-25-39	-55.73	-27.23	216	111	14	SKSac	5-20s	0.98	46	19	1.74	1.93	11.9	4.88	fair
BI.KHMZ	33.74	49.96	2016-113-03-03-41	-0.29	-80.5	295	123	10	SKKSac	5-20s	Null	Null	Null	Null	Null	16.35	6.11	goodNull
BI.KHMZ	33.74	49.96	2016-329-18-43-48	11.96	-88.84	312	120	10	SKSac	4-25s	Null	Null	Null	Null	Null	0.02	0	fairNull
BI.KRBR	29.98	56.76	2004-250-12-42-59	-55.37	-28.98	218	112	10	SKSac	5-20s	Null	Null	Null	Null	Null	7.91	3.93	goodNull
BI.KRBR	29.98	56.76	2004-326-11-41-07	15.68	-61.71	299	105	14	SKSac	5-20s	Null	Null	Null	Null	Null	19.73	7.04	goodNull
BI.KRBR	29.98	56.76	2005-038-20-02-17	-4.53	153.19	91	98	37	SKSac	4-25s	0.95	-75	6	1.74	0.72	-7.29	0	good
BI.KRBR	29.98	56.76	2005-101-17-08-53	-21.98	170.61	99	121	68	SKSac	4-25s	0.95	-39	37	1.13	1.28	-7.29	0	fair
BI.KRBR	29.98	56.76	2005-164-22-44-33	-19.99	-69.2	268	130	115	SKKSac	5-20s	Null	Null	Null	Null	Null	11.1	4.29	goodNull
BI.KRBR	29.98	56.76	2005-278-10-07-22	-20.54	-174.28	91	133	15	PKSbc	4-25s	0.93	-71	8	1.44	0.56	-7.29	0	fair
BI.KRBR	29.98	56.76	2006-033-12-48-43	-17.75	-178.39	89	129	598	PKSbc	4-25s	0.95	-73	7	1.74	0.62	-7.29	0	good
BI.KRBR	29.98	56.76	2006-049-15-59-22	-5.19	152.05	92	97	44	SKSac	4-25s	0.92	-68	38	0.92	1.28	-7.29	0	fair
BI.KRBR	29.98	56.76	2006-090-13-21-00	-29.43	-176.77	103	134	13	PKSbc	4-25s	0.96	-58	6	2.05	0.56	-7.29	0	good
BI.KRBR	29.98	56.76	2006-120-19-17-14	-27.02	-71.02	260	134	12	PKSbc	5-20s	0.98	-68	25	1.04	0.4	5.04	3.97	fair
BI.KRBR	29.98	56.76	2006-136-10-39-23	-31.81	-179.31	107	132	152	PKSbc	4-25s	0.96	-52	31	1.33	1.23	-7.29	0	fair
BI.KRBR	29.98	56.76	2006-136-10-39-23	-31.81	-179.31	107	132	152	PKSbc	5-20s	0.9	-28	45	0.9	1.26	4.27	2.26	fair
BI.KRBR	29.98	56.76	2006-219-22-18-55	-15.8	167.79	94	116	150	SKSac	5-20s	0.97	-70	18	1.18	0.65	8.11	5.8	fair
BI.KRBR	29.98	56.76	2006-223-14-30-40	18.54	-101.05	333	127	56	SKKSac	5-20s	0.99	-68	21	0.48	0.22	15.2	4.89	good
BI.KRBR	29.98	56.76	2006-223-14-30-40	18.54	-101.05	333	127	56	SKSac	5-20s	0.96	-69	18	0.42	0.28	5.96	4.46	fair
BI.KRBR	29.98	56.76	2006-237-00-44-46	-24.4	-67.03	262	130	184	SKKSac	5-20s	Null	Null	Null	Null	Null	9.41	4.07	goodNull
BI.KRBR	29.98	56.76	2006-262-13-29-54	-26.15	-175.6	99	134	18	PKSbc	4-25s	0.91	-65	10	1.74	0.92	-7.29	0	fair
BI.KRBR	29.98	56.76	2006-290-01-25-12	-5.88	150.98	93	97	32	SKSac	5-20s	0.99	-71	12	1.43	0.58	26.58	3.95	fair
BI.KRBR	29.98	56.76	2006-311-17-38-33	-6.48	151.19	93	97	11	SKSac	5-20s	Null	Null	Null	Null	Null	18.98	12.08	goodNull
BI.KRBR	29.98	56.76	2007-270-19-57-44	-21.1	169.28	99	119	9	SKKSac	5-20s	0.99	-74	3	1.82	0.61	31.31	6.9	fair
BI.KRBR	29.98	56.76	2007-271-01-01-49	-21.21	169.36	99	119	12	SKKSac	5-20s	Null	Null	Null	Null	Null	4.61	5.22	fairNull
BI.KRBR	29.98	56.76	2007-271-01-01-49	-21.21	169.36	99	119	12	SKSac	5-20s	0.98	-37	32	0.38	0.68	8.36	5.97	fair
BI.KRBR	29.98	56.76	2007-282-15-03-41	-4.81	152.89	91	98	39	SKKSac	5-20s	0.94	-15	6	2.06	0.48	13.17	2.38	good
BI.KRBR	29.98	56.76	2007-282-15-03-41	-4.81	152.89	91	98	39	SKSac	5-20s	0.95	-52	18	0.44	0.3	4.71	3.88	fair
BI.KRBR	29.98	56.76	2007-323-00-52-12	-21.18	-178.75	94	130	558	PKSbc	4-25s	0.92	-65	23	0.72	0.51	-7.29	0	fair
BI.KRBR	29.98	56.76	2007-333-19-00-20	14.94	-61.27	298	105	156	SKSac	5-20s	Null	Null	Null	Null	Null	14.63	6.02	goodNull
BI.KRBR	29.98	56.76	2007-347-07-23-39	-23.2	-70.55	265	133	16	PKSbc	4-25s	Null	Null	Null	Null	Null	-7.29	0	fairNull
BI.KRBR	29.98	56.76	2007-347-15-51-27	-15.21	-172.37	83	133	17	PKSbc	5-20s	0.94	-27	68	0.92	2.42	6.84	4.12	fair
BI.KRBR	29.98	56.76	2008-015-17-52-15	-21.98	-179.53	95	129	597	PKSbc	5-20s	0.95	-42	35	0.88	0.94	6.04	2.48	fair
BI.KRBR	29.98	56.76	2008-043-12-50-18	16.36	-94.3	325	126	83	SKKSac	5-20s	Null	Null	Null	Null	Null	12.18	7.63	goodNull
BI.KRBR	29.98	56.76	2008-100-11-13-17	-20.18	168.86	98	118	16	SKKSac	5-20s	Null	Null	Null	Null	Null	5.35	3.7	fairNull
BI.KRBR	29.98	56.76	2008-100-11-13-17	-20.18	168.86	98	118	16	SKSac	5-20s	Null	Null	Null	Null	Null	9.49	5.13	goodNull
BI.KRBR	29.98	56.76	2008-201-22-39-52	-17.34	-177.31	88	129	391	PKSbc	5-20s	0.99	-47	33	0.64	0.65	11.32	3.91	fair
BI.KRBR	29.98	56.76	2008-252-03-03-15	-19.96	169.11	98	119	36	SKKSac	5-20s	Null	Null	Null	Null	Null	9.63	5.12	goodNull
BI.KRBR	29.98	56.76	2008-286-20-55-41	-20.12	-64.97	266	127	352	SKSac	5-20s	0.95	-46	43	0.46	1.05	6.54	3.36	fair
BI.KRBR	29.98	56.76	2008-296-12-55-57	-18.41	-175.35	89	131	233	PKSbc	5-20s	0.95	-69	59	1.1	1.45	7.99	3.41	fair
BI.KRBR	29.98	56.76	2008-306-01-13-09	-3.4	148.71	92	93	10	SKSac	5-20s	0.98	-61	40	0.94	0.87	10.68	3.5	fair
BI.KRBR	29.98	56.76	2008-359-09-11-34	-17.29	-171.91	85	134	9	PKSbc	5-20s	0.98	-59	36	0.56	1.12	3.86	2.99	fair
BI.KRBR	29.98	56.76	2009-033-17-53-21	-13.58	-76.56	280	134	21	PKSbc	5-20s	0.98	50	27	0.28	0.3	8.14	5.98	fair
BI.KRBR	29.98	56.76	2009-049-21-53-45	-27.42	-176.33	101	134	25	PKSbc	4-25s	0.92	-23	39	0.62	1.44	-7.29	0	fair
BI.KRBR	29.98	56.76	2009-193-06-12-47	-15.04	-70.44	275	129	198	SKSac	5-20s	0.99	-21	33	0.54	0.23	7.39	4.5	fair
BI.KRBR	29.98	56.76	2009-242-14-51-32	-15.22	-172.57	83	132	11	PKSbc	4-25s	0.91	-58	30	0.72	0.51	-7.29	0	fair
BI.KRBR	29.98	56.76	2009-283-19-41-24	-15.66	-173.06	84	132	13	PKSbc	4-25s	0.95	-63	20	1.23	0.62	-7.29	0	fair
BI.KRBR	29.98	56.76	2010-009-05-51-30	-9.13	157.63	93	104	12	SKSac	5-20s	0.96	-16	30	1.5	1.13	10.62	3.12	good
BI.KRBR	29.98	56.76	2010-044-02-34-28	-21.9	-174.77	93	133	11	PKSbc	5-20s	0.96	-68	28	1.24	0.68	9.17	3.56	fair
BI.KRBR	29.98	56.76	2010-044-02-34-28	-21.9	-174.77	93	133	11	SKKSac	5-20s	0.94	-74	71	1.98	1.85	6.73	3.66	fair
BI.KRBR	29.98	56.76	2010-053-07-00-51	-23.63	-176.04	95	133	15	PKSbc	4-25s	0.92	-53	31	0.72	0.56	-7.29	0	fair
BI.KRBR	29.98	56.76	2010-079-14-00-49	-3.36	152.25	90	96	414	SKSac	5-20s	0.94	-37	40	0.88	0.8	3.93	2.57	fair
BI.KRBR	29.98	56.76	2010-143-22-46-52	-13.93	-74.35	279	132	101	PKSbc	5-20s	0.99	50	31	0.3	0.32	7.64	5.08	fair
BI.KRBR	29.98	56.76	2010-181-04-31-02	-23.31	179.12	97	129	581	PKSbc	5-20s	0.98	-34	36	0.3	1.2	10.5	6.25	fair
BI.KRBR	29.98	56.76	2010-199-13-04-09	-5.97	150.43	93	96	28	SKSac	4-25s	0.91	-63	36	0.82	1.13	-7.29	0	fair
BI.KRBR	29.98	56.76	2010-216-07-15-33	-5.49	146.82	95	93	220	SKSac	5-20s	0.96	-48	29	0.74	0.74	4.41	3.28	fair
BI.KRBR	29.98	56.76	2010-224-11-54-15	-1.27	-77.31	294	128	206	SKSac	5-20s	Null	Null	Null	Null	Null	13.45	5.8	goodNull
BI.KRBR	29.98	56.76	2010-228-19-35-49	-20.8	-178.83	93	129	603	PKSbc	4-25s	0.91	-63	17	1.03	0.62	-7.29	0	fair
BI.KRBR	29.98	56.76	2010-342-05-24-35	-56.41	-25.74	216	111	29	SKKSac	4-25s	0.95	-71	13	1.23	0.72	-7.29	0	fair
BI.KRBR	29.98	56.76	2010-347-01-14-42	-6.53	155.65	91	101	135	SKSac	5-20s	0.98	-34	34	1.12	1.04	7.32	2.4	fair
BI.KRBR	29.98	56.76	2011-024-01-02-02	-19.2	-173.51	89	133	16	PKSbc	4-25s	0.96	-65	10	1.74	0.56	-7.29	0	good
BI.KRBR	29.98	56.76	2011-038-19-53-42	-7.15	155.18	92	101	415	SKSac	4-25s	0.93	-53	32	0.62	0.51	-7.29	0	fair
BI.KRBR	29.98	56.76	2011-065-12-31-59	-18.02	-69.36	271	130	118	SKSac	5-20s	0.96	-60	32	0.98	0.72	8.47	3.44	fair
BI.KRBR	29.98	56.76	2011-065-14-32-36	-56.42	-27.06	216	111	87	SKSac	5-20s	Null	Null	Null	Null	Null	7.4	7.63	goodNull
BI.KRBR	29.98	56.76	2011-236-17-46-11	-7.64	-74.53	286	129	147	SKKSac	5-20s	0.99	-24	42	0.67	0.34	12.19	4.28	fair
BI.KRBR	29.98	56.76	2011-236-23-06-17	-18.16	167.73	96	117	13	SKSac	4-25s	0.9	-15	40	0.72	1.33	-7.29	0	fair
BI.KRBR	29.98	56.76	2011-341-22-23-09	-27.9	-70.92	259	134	20	PKSbc	5-20s	0.97	-58	16	0.32	0.2	8.42	6.09	fair
BI.KRBR	29.98	56.76	2011-348-05-04-58	-7.55	146.81	96	94	135	SKSac	5-20s	0.97	-47	22	0.42	0.38	5	4.43	fair
BI.KRBR	29.98	56.76	2012-210-20-03-56	-4.65	153.17	91	98	41	SKKSac	5-20s	0.99	-75	14	1.02	0.55	19.32	5.41	fair
BI.KRBR	29.98	56.76	2012-302-03-04-08	52.79	-132.1	5	97	14	SKKSac	5-20s	0.94	-43	27	0.48	0.62	7.87	4.49	fair
BI.KRBR	29.98	56.76	2012-315-14-57-50	-8.87	-75.07	285	130	129	PKSbc	5-20s	0.99	69	29	0.3	0.5	8.09	4.49	fair
BI.KRBR	29.98	56.76	2013-030-20-15-43	-28.09	-70.65	259	134	45	PKSbc	5-20s	0.98	-59	21	0.4	0.28	8.7	6.09	fair
BI.KRBR	29.98	56.76	2013-038-00-30-10	-11.66	164.94	91	111	8	SKSac	5-20s	0.97	-55	10	1.56	0.39	8.19	1.69	fair
BI.KRBR	29.98	56.76	2013-188-20-30-06	-6.03	149.71	94	96	56	SKSac	5-20s	Null	Null	Null	Null	Null	14.11	6.13	goodNull
BI.KRBR	29.98	56.76	2013-250-00-13-29	14.61	-92.12	322	126	66	SKSac	5-20s	Null	Null	Null	Null	Null	7.49	3.67	fairNull
BI.KRBR	29.98	56.76	2013-268-16-42-43	-15.84	-74.51	276	133	40	PKSbc	5-20s	0.97	-42	26	0.22	0.36	7.5	6.52	fair
BI.KRBR	29.98	56.76	2013-327-07-48-32	-17.12	-176.54	88	130	371	SKSac	5-20s	0.98	-35	41	0.96	1.35	9.9	3.33	fair
BI.KRBR	29.98	56.76	2014-038-08-40-13	-15.07	167.37	93	115	122	SKSac	5-20s	0.98	-69	46	1.08	1.15	9.01	3.53	fair
BI.KRBR	29.98	56.76	2014-185-15-00-27	-6.23	152.81	92	98	20	SKSac	5-20s	0.98	-35	10	0.9	0.16	50.5	3.58	good
BI.KRBR	29.98	56.76	2014-188-11-23-54	14.72	-92.46	322	127	53	SKSac	4-25s	Null	Null	Null	Null	Null	-7.29	0	fairNull
BI.KRBR	29.98	56.76	2014-206-10-54-49	58.31	-136.96	7	91	10	SKSac	5-20s	Null	Null	Null	Null	Null	5.97	5.83	goodNull
BI.KRBR	29.98	56.76	2015-023-03-47-27	-17.03	168.52	95	117	220	SKSac	4-25s	0.93	-67	12	1.54	0.82	-7.29	0	good
BI.KRBR	29.98	56.76	2015-028-02-43-19	-20.97	-178.3	93	130	484	PKSbc	5-20s	0.98	-44	12	1.18	0.26	13.91	1.97	fair
BI.KRBR	29.98	56.76	2015-042-18-57-22	-23.11	-66.69	264	129	223	SKKSac	5-20s	Null	Null	Null	Null	Null	13	5.76	goodNull
BI.KRBR	29.98	56.76	2015-089-07-56-53	-15.43	-173.05	84	132	10	PKSbc	4-25s	0.91	-75	16	1.44	0.82	-7.29	0	fair
BI.KRBR	29.98	56.76	2015-089-08-18-01	-15.39	-172.94	84	132	14	PKSbc	5-20s	0.94	-67	47	0.76	0.75	7.82	3.81	fair
BI.KRBR	29.98	56.76	2015-089-08-48-25	-15.5	-173.03	84	132	11	PKSbc	4-25s	0.96	-75	13	1.54	0.77	-7.29	0	fair
BI.KRBR	29.98	56.76	2015-107-15-52-51	-15.88	-178.6	87	128	10	PKSdf	5-20s	0.96	-54	20	1.92	0.9	4.46	1.06	fair
BI.KRBR	29.98	56.76	2015-114-13-56-15	51.61	-130.77	5	98	8	SKSac	5-20s	0.97	-39	32	0.68	1	7.39	3.95	fair
BI.KRBR	29.98	56.76	2015-118-16-39-39	-20.89	-178.63	93	130	581	PKSbc	4-25s	0.92	-67	17	1.33	0.97	-7.29	0	fair
BI.KRBR	29.98	56.76	2015-120-10-45-02	-5.38	151.77	92	97	31	SKKSac	5-20s	Null	Null	Null	Null	Null	9.39	8.92	goodNull
BI.KRBR	29.98	56.76	2015-120-10-45-02	-5.38	151.77	92	97	31	SKSac	5-20s	0.99	-42	28	0.34	0.44	10.7	6.49	fair
BI.KRBR	29.98	56.76	2015-172-21-28-16	-20.43	-178.33	93	130	562	PKSbc	5-20s	0.97	-56	20	0.98	0.48	10.23	2.52	fair
BI.KRBR	29.98	56.76	2015-191-04-12-42	-9.31	158.4	92	105	12	SKSac	4-25s	0.95	-71	37	1.13	1.9	-7.29	0	fair
BI.KRBR	29.98	56.76	2015-224-18-49-24	-9.33	157.88	93	104	6	SKSac	4-25s	0.95	-75	40	1.33	2	-7.29	0	fair
BI.KRBR	29.98	56.76	2015-259-14-03-22	-6.01	151.48	93	97	6	SKSac	5-20s	0.98	-71	70	0.8	1.55	10.64	5.31	fair
BI.KRBR	29.98	56.76	2015-293-21-52-02	-14.86	167.3	93	115	135	SKKSac	5-20s	0.95	-42	41	0.76	2.57	6.18	3.62	fair
BI.KRBR	29.98	56.76	2015-322-18-31-04	-8.9	158.42	92	104	12	SKSac	5-20s	0.98	-51	25	0.44	0.42	7.06	5.33	fair
BI.KRBR	29.98	56.76	2015-351-19-49-53	15.8	-93.63	324	126	85	SKSac	5-20s	0.97	-50	72	0.74	1.06	10.28	6.32	fair
BI.KRBR	29.98	56.76	2016-110-05-25-39	-55.73	-27.23	217	111	14	SKSac	5-20s	0.99	-11	28	0.42	0.32	8.8	6.37	fair
BI.KRBR	29.98	56.76	2016-149-05-38-50	-21.97	-178.2	94	130	405	PKSbc	4-25s	0.95	-71	9	1.54	0.77	-7.29	0	fair
BI.KRBR	29.98	56.76	2016-166-13-49-22	-18.76	168.83	97	118	111	SKSac	4-25s	0.95	-60	7	1.74	0.46	-7.29	0	good
BI.KRBR	29.98	56.76	2016-195-12-11-13	-28.03	-176.39	101	134	12	PKSbc	4-25s	0.9	-63	12	1.54	0.87	-7.29	0	fair
BI.MAKU	39.35	44.68	2004-124-04-36-50	-37.7	-73.41	251	132	21	PKSbc	4-25s	0.96	-84	52	0.62	0.97	12.25	0	fair
BI.MAKU	39.35	44.68	2004-197-04-27-14	-17.66	-178.76	73	137	565	PKSbc	5-20s	0.99	-68	33	0.4	1.09	18.62	6.5	fair
BI.MAKU	39.35	44.68	2004-300-22-53-07	-57.07	-24.68	214	112	10	SKSac	5-20s	0.97	42	11	1.64	2.08	13.71	5.68	fair
BI.MAKU	39.35	44.68	2005-038-20-02-17	-4.53	153.19	82	107	37	SKSac	4-25s	0.9	-38	36	0.31	0.46	12.25	0	fair
BI.MAKU	39.35	44.68	2005-080-12-23-54	-24.98	-63.47	260	119	579	SKSac	5-20s	0.98	71	31	2.06	1.96	8.35	4.27	fair
BI.MAKU	39.35	44.68	2005-164-22-44-33	-19.99	-69.2	268	121	116	SKKSac	4-25s	Null	Null	Null	Null	Null	12.25	0	fairNull
BI.MAKU	39.35	44.68	2005-164-22-44-33	-19.99	-69.2	268	121	116	SKSac	4-25s	Null	Null	Null	Null	Null	12.25	0	fairNull
BI.MAKU	39.35	44.68	2005-321-19-26-54	-22.36	-67.89	265	121	147	SKSac	4-25s	0.92	-12	5	2.36	1.49	12.25	0	fair
BI.MAKU	39.35	44.68	2006-290-01-25-12	-5.88	150.98	84	106	32	SKSac	4-25s	0.93	-36	33	0.31	0.41	12.25	0	fair
BI.MAKU	39.35	44.68	2007-091-20-47-31	-7.17	155.78	82	111	10	PKSdf	5-20s	0.98	-89	10	2.16	1.86	14.1	4.66	fair
BI.MAKU	39.35	44.68	2007-126-21-11-52	-19.4	-179.35	75	137	676	PKSbc	5-20s	0.98	81	79	1.52	2.21	10.93	6.67	fair
BI.MAKU	39.35	44.68	2007-126-21-11-52	-19.4	-179.35	75	137	676	SKKSac	5-20s	0.99	-75	23	1	0.55	15.01	3.05	fair
BI.MAKU	39.35	44.68	2007-126-21-11-52	-19.4	-179.35	75	137	676	SKSac	5-20s	0.95	-71	23	0.24	0.44	4.54	4.07	good
BI.MAKU	39.35	44.68	2007-187-01-09-19	16.35	-93.99	317	112	113	SKKSac	5-20s	0.96	-33	8	2.76	1.56	9.81	3.87	fair
BI.MAKU	39.35	44.68	2007-282-15-03-41	-4.81	152.89	82	107	39	SKSac	4-25s	0.96	-24	26	0.51	0.51	12.25	0	fair
BI.MAKU	39.35	44.68	2007-356-07-11-08	-2.41	139.07	89	95	20	SKSac	5-20s	0.96	-32	62	0.78	3.24	5.96	3.28	fair
BI.MAKU	39.35	44.68	2008-130-21-51-29	12.52	143.18	75	89	76	SKSac	4-25s	0.93	-25	4	1.95	0.82	12.25	0	fair
BI.MAKU	39.35	44.68	2009-106-14-57-06	-60.2	-26.86	212	115	20	SKSac	4-25s	Null	Null	Null	Null	Null	12.25	0	fairNull
BI.MAKU	39.35	44.68	2009-146-00-49-39	-21.01	-177.02	75	140	35	PKSbc	4-25s	0.92	-85	60	0.62	0.62	12.25	0	fair
BI.MAKU	39.35	44.68	2009-153-02-17-03	-17.76	167.95	83	127	15	SKSac	5-20s	Null	Null	Null	Null	Null	4.52	3.46	goodNull
BI.MAKU	39.35	44.68	2009-217-08-31-40	-45.55	166.36	118	137	10	SKKSac	5-20s	Null	Null	Null	Null	Null	13.13	5.93	goodNull
BI.MAKU	39.35	44.68	2009-242-14-51-32	-15.22	-172.57	64	140	11	PKSdf	5-20s	0.97	-39	62	1.18	1.48	11.79	4.75	fair
BI.MAKU	39.35	44.68	2009-245-18-00-09	-29.39	-178.96	88	143	257	SKKSac	5-20s	0.97	-20	70	1.16	2.39	6.62	3.5	fair
BI.MAKU	39.35	44.68	2009-255-20-06-25	10.71	-67.93	293	100	14	SKSac	5-20s	Null	Null	Null	Null	Null	16.9	10.38	goodNull
BI.MAKU	39.35	44.68	2009-318-19-44-29	-22.96	-66.64	264	120	220	SKKSac	4-25s	0.91	68	12	1.54	0.92	12.25	0	fair
BI.MAKU	39.35	44.68	2009-318-19-44-29	-22.96	-66.64	264	120	220	SKSac	4-25s	0.91	-21	12	1.64	1.08	12.25	0	fair
BI.MAKU	39.35	44.68	2010-063-22-39-26	-22.23	-68.33	266	121	114	SKSac	5-20s	Null	Null	Null	Null	Null	11.86	5.63	goodNull
BI.MAKU	39.35	44.68	2010-107-23-15-22	-6.67	147.29	87	104	53	SKSac	4-25s	0.92	-20	24	1.13	1.03	12.25	0	fair
BI.MAKU	39.35	44.68	2010-123-23-09-44	-38.07	-73.45	251	133	19	PKSbc	4-25s	0.93	-35	7	2.05	0.87	12.25	0	fair
BI.MAKU	39.35	44.68	2010-144-16-18-29	-8.09	-71.56	281	115	581	SKKSac	5-20s	0.95	50	31	1.14	0.91	5.57	2.23	fair
BI.MAKU	39.35	44.68	2010-224-11-54-15	-1.27	-77.31	291	115	206	SKKSac	5-20s	0.98	-6	24	0.64	0.5	2.47	2.23	fair
BI.MAKU	39.35	44.68	2010-224-11-54-15	-1.27	-77.31	291	115	206	SKSac	5-20s	Null	Null	Null	Null	Null	11.48	4.33	fairNull
BI.MAKU	39.35	44.68	2011-002-20-20-17	-38.35	-73.33	250	133	24	PKSbc	5-20s	0.99	-41	51	0.74	1.09	9.55	5.05	fair
BI.MAKU	39.35	44.68	2011-009-17-21-51	-19.2	168.16	85	128	18	PKSdf	5-20s	0.98	-23	60	0.98	1.47	11.7	4.62	fair
BI.MAKU	39.35	44.68	2011-097-13-11-22	17.21	-94.34	317	112	166	SKKSac	5-20s	0.99	13	22	0.2	0.3	4.71	4.54	good
BI.MAKU	39.35	44.68	2011-097-13-11-22	17.21	-94.34	317	112	166	SKSac	5-20s	0.99	3	15	0.26	0.16	15.55	10.58	good
BI.MAKU	39.35	44.68	2011-113-04-16-54	-10.38	161.2	81	117	79	SKSac	5-20s	0.98	-65	23	0.52	0.32	4.21	3.4	fair
BI.MAKU	39.35	44.68	2011-236-17-46-11	-7.64	-74.53	283	117	147	SKSac	5-20s	0.98	25	68	1.18	2.6	9.97	5.23	fair
BI.MAKU	39.35	44.68	2011-242-06-57-41	-6.36	126.75	100	88	470	SKSac	4-25s	0.92	-57	24	0.82	0.67	12.25	0	fair
BI.MAKU	39.35	44.68	2011-287-03-35-14	-6.57	147.88	87	104	37	SKSac	5-20s	Null	Null	Null	Null	Null	13.22	7.7	goodNull
BI.MAKU	39.35	44.68	2011-348-05-04-58	-7.55	146.81	88	104	135	SKSac	5-20s	0.99	-40	45	0.46	0.94	17.34	5.97	good
BI.MAKU	39.35	44.68	2012-022-05-53-42	-56.76	-25.15	214	112	13	SKKSac	5-20s	Null	Null	Null	Null	Null	18.72	7.82	goodNull
BI.MAKU	39.35	44.68	2012-024-16-31-07	-56.34	-27.72	215	113	8	SKKSac	4-25s	0.93	52	4	2.05	0.46	12.25	0	fair
BI.MAKU	39.35	44.68	2012-105-10-56-19	-57.68	-65.31	223	132	15	PKSbc	5-20s	0.99	-54	8	1.84	0.98	20.14	5.59	fair
BI.MAKU	39.35	44.68	2012-108-07-13-49	-5.46	147.12	86	103	198	SKSac	4-25s	0.94	-67	24	0.41	0.31	12.25	0	fair
BI.MAKU	39.35	44.68	2012-112-01-16-52	-1.62	134.28	92	91	16	SKSac	4-25s	0.93	-81	8	1.23	1.08	12.25	0	fair
BI.MAKU	39.35	44.68	2012-114-17-36-21	-28.56	-177.41	86	144	114	SKKSac	5-20s	0.97	-13	77	1.54	2.33	11.63	5.83	fair
BI.MAKU	39.35	44.68	2012-119-10-08-08	-18.68	-174.71	70	140	134	SKKSac	5-20s	0.99	82	38	1.56	1.91	11.66	4.43	fair
BI.MAKU	39.35	44.68	2012-188-02-28-22	-14.66	167.34	81	124	160	SKSac	5-20s	0.94	-29	36	1.38	1.21	7.01	2.51	fair
BI.MAKU	39.35	44.68	2012-210-20-03-56	-4.65	153.17	82	107	41	SKSac	4-25s	0.9	-25	16	0.51	0.36	12.25	0	fair
BI.MAKU	39.35	44.68	2012-252-10-51-44	-3.18	135.11	92	92	21	SKSac	4-25s	0.9	-43	33	0.31	0.36	12.25	0	fair
BI.MAKU	39.35	44.68	2012-312-16-35-46	13.99	-91.89	313	113	24	SKKSac	5-20s	Null	Null	Null	Null	Null	17.84	9.06	goodNull
BI.MAKU	39.35	44.68	2013-096-04-42-35	-3.52	138.48	90	95	66	SKSac	4-25s	Null	Null	Null	Null	Null	12.25	0	fairNull
BI.MAKU	39.35	44.68	2013-106-22-55-26	-3.21	142.54	88	98	13	SKSac	5-20s	0.96	-82	61	1.82	1.5	15.94	5.47	fair
BI.MAKU	39.35	44.68	2013-113-23-14-40	-3.9	152.13	82	106	10	SKKSac	5-20s	0.98	-14	7	2.08	1.14	31.25	7.24	fair
BI.MAKU	39.35	44.68	2013-327-07-48-32	-17.12	-176.54	70	138	371	SKKSac	5-20s	0.98	-33	51	1.1	1.31	14.1	5.37	fair
BI.MAKU	39.35	44.68	2013-335-01-24-13	-7.03	128.38	99	90	10	SKSac	4-25s	0.92	-62	38	1.03	1.54	12.25	0	fair
BI.MAKU	39.35	44.68	2014-001-16-03-29	-13.86	167.25	80	124	187	SKKSac	5-20s	0.99	-89	10	1.16	2.86	13.78	5.95	fair
BI.MAKU	39.35	44.68	2014-001-16-03-29	-13.86	167.25	80	124	187	SKSac	5-20s	0.97	-29	62	0.84	1.51	12.39	5.05	fair
BI.MAKU	39.35	44.68	2014-180-07-52-55	-55.47	-28.37	216	113	8	SKKSac	4-25s	Null	Null	Null	Null	Null	12.25	0	fairNull
BI.MAKU	39.35	44.68	2014-215-00-22-03	0.83	146.17	82	98	13	SKSac	4-25s	0.96	-28	6	1.95	0.56	12.25	0	fair
BI.MAKU	39.35	44.68	2015-259-14-03-22	-6.01	151.48	84	107	6	SKSac	5-20s	0.98	-23	5	2.1	0.41	13.19	2.05	good
BI.MAKU	39.35	44.68	2016-149-09-46-59	-56.24	-26.94	215	113	78	SKKSac	5-20s	Null	Null	Null	Null	Null	18.72	10.62	goodNull
BI.MAKU	39.35	44.68	2016-149-09-46-59	-56.24	-26.94	215	113	78	SKSac	4-25s	0.93	-60	2	2.15	0.97	12.25	0	fair
BI.MAKU	39.35	44.68	2016-302-05-26-55	-4.67	153.22	82	107	45	SKSac	4-25s	0.95	-26	4	1.54	0.36	12.25	0	good
BI.MRVT	37.66	56.09	2006-120-19-17-14	-27.02	-71.02	267	135	12	PKSbc	4-25s	0.92	35	19	1.13	0.46	-0.76	0	fair
BI.MRVT	37.66	56.09	2006-153-07-31-36	-20.84	-178.7	86	130	591	PKSbc	5-20s	0.94	40	20	1.22	0.42	5.92	1.59	fair
BI.MRVT	37.66	56.09	2006-197-11-42-41	-28.71	-72.54	266	137	10	PKSbc	4-25s	0.92	35	20	1.23	0.62	-0.76	0	fair
BI.MRVT	37.66	56.09	2006-219-22-18-55	-15.8	167.79	90	117	150	SKKSac	5-20s	0.98	40	35	0.84	1.13	7.95	3.36	fair
BI.MRVT	37.66	56.09	2006-237-00-44-46	-24.4	-67.03	268	130	184	SKKSac	4-25s	0.95	56	16	0.92	0.41	-0.76	0	fair
BI.MRVT	37.66	56.09	2006-260-09-34-13	-31.73	-67.14	260	134	137	SKKSac	5-20s	0.99	40	18	1.3	0.39	9.72	1.94	fair
BI.MRVT	37.66	56.09	2006-265-02-32-25	-26.87	-63.15	263	128	598	PKSbc	4-25s	0.95	39	6	1.23	0.21	-0.76	0	good
BI.MRVT	37.66	56.09	2006-272-13-08-26	10.88	-61.76	296	104	53	SKSac	4-25s	0.92	52	23	0.72	0.56	-0.76	0	good
BI.MRVT	37.66	56.09	2006-290-01-25-12	-5.88	150.98	92	97	32	SKSac	4-25s	0.95	50	22	0.72	0.36	-0.76	0	good
BI.MRVT	37.66	56.09	2006-295-08-55-16	-45.73	95.99	153	90	10	SKSac	4-25s	0.93	42	23	1.03	0.82	-0.76	0	good
BI.MRVT	37.66	56.09	2006-311-17-38-33	-6.48	151.19	92	98	11	SKSac	4-25s	0.93	28	22	0.92	0.67	-0.76	0	good
BI.MRVT	37.66	56.09	2006-316-18-21-26	-6.22	151.05	92	98	12	SKSac	5-20s	0.93	51	17	1.42	0.44	7.1	1.57	fair
BI.MRVT	37.66	56.09	2006-317-01-26-35	-26.05	-63.28	264	128	572	PKSbc	4-25s	0.93	42	8	1.23	0.26	-0.76	0	good
BI.MRVT	37.66	56.09	2006-317-16-12-28	-6.38	151.23	92	98	11	SKSac	4-25s	0.93	47	16	0.82	0.21	-0.76	0	good
BI.MRVT	37.66	56.09	2007-059-23-13-15	-55.24	-29.14	220	117	10	SKKSac	5-20s	0.99	29	12	1.98	0.99	19.24	4.33	fair
BI.MRVT	37.66	56.09	2007-059-23-13-15	-55.24	-29.14	220	117	10	SKSac	5-20s	0.99	34	9	1.96	0.95	29.08	7.27	fair
BI.MRVT	37.66	56.09	2007-092-12-02-23	-8.71	157.62	90	104	14	SKSac	4-25s	0.94	50	32	0.51	0.51	-0.76	0	fair
BI.MRVT	37.66	56.09	2007-092-23-20-23	-8.62	157.39	90	104	18	SKSac	4-25s	0.91	52	21	0.92	0.41	-0.76	0	good
BI.MRVT	37.66	56.09	2007-093-20-26-09	-20.63	168.99	94	120	12	SKKSac	5-20s	0.96	40	11	1.4	0.27	18.94	2.05	fair
BI.MRVT	37.66	56.09	2007-094-06-34-35	-7.76	156.49	90	103	17	SKSac	4-25s	0.94	59	34	0.72	0.72	-0.76	0	fair
BI.MRVT	37.66	56.09	2007-094-11-00-27	-20.71	168.83	94	120	13	SKKSac	4-25s	0.91	48	21	0.92	0.36	-0.76	0	good
BI.MRVT	37.66	56.09	2007-094-11-00-27	-20.71	168.83	94	120	13	SKSac	4-25s	0.93	40	33	0.72	0.67	-0.76	0	fair
BI.MRVT	37.66	56.09	2007-094-11-02-29	-20.69	169.06	94	120	10	SKKSac	5-20s	Null	Null	Null	Null	Null	10.94	3.95	goodNull
BI.MRVT	37.66	56.09	2007-187-01-09-19	16.35	-93.99	327	119	113	SKSac	5-20s	Null	Null	Null	Null	Null	13.54	7.62	goodNull
BI.MRVT	37.66	56.09	2007-193-05-23-49	-7.93	-74.38	291	126	152	SKKSac	5-20s	0.96	38	9	2.06	0.7	11.76	2.41	good
BI.MRVT	37.66	56.09	2007-196-09-27-34	-15.38	168.6	89	117	8	SKKSac	5-20s	0.99	26	30	0.42	0.4	5.7	4.36	fair
BI.MRVT	37.66	56.09	2007-196-09-27-34	-15.38	168.6	89	117	8	SKSac	5-20s	0.99	24	17	1.1	0.51	11.16	2.61	good
BI.MRVT	37.66	56.09	2007-202-15-34-52	-22.15	-65.78	270	128	289	SKKSac	5-20s	0.94	58	47	0.84	0.99	5.57	2.81	fair
BI.MRVT	37.66	56.09	2007-202-15-34-52	-22.15	-65.78	270	128	290	SKSac	4-25s	0.92	62	17	1.13	0.56	-0.76	0	fair
BI.MRVT	37.66	56.09	2007-213-17-08-51	-15.6	167.68	90	116	120	SKKSac	5-20s	0.97	59	28	1.36	0.77	10.98	2.63	fair
BI.MRVT	37.66	56.09	2007-228-05-16-56	-14.28	-76.13	286	132	23	PKSbc	5-20s	0.97	41	20	1.02	0.58	14.28	3.64	fair
BI.MRVT	37.66	56.09	2007-228-08-39-28	-9.83	159.47	90	107	15	SKSac	4-25s	0.94	40	29	1.13	0.77	-0.76	0	fair
BI.MRVT	37.66	56.09	2007-229-13-18-13	-13.61	-76.6	287	132	49	PKSbc	4-25s	0.91	41	9	1.23	0.46	-0.76	0	fair
BI.MRVT	37.66	56.09	2007-230-02-52-35	-13.8	-76.29	286	132	30	PKSbc	4-25s	0.96	48	21	0.72	0.46	-0.76	0	fair
BI.MRVT	37.66	56.09	2007-238-12-37-31	-17.46	-174.34	80	132	127	SKKSac	5-20s	0.99	29	34	0.48	0.55	17.13	5.67	good
BI.MRVT	37.66	56.09	2007-253-01-49-11	2.97	-77.96	303	121	15	SKKSac	5-20s	Null	Null	Null	Null	Null	10.22	5.5	goodNull
BI.MRVT	37.66	56.09	2007-268-05-16-01	-30.96	180	99	134	416	PKSbc	5-20s	0.94	82	11	0.82	1.47	7.22	4.38	fair
BI.MRVT	37.66	56.09	2007-270-19-57-44	-21.1	169.28	94	121	9	SKKSac	5-20s	0.96	50	20	1.1	0.35	10.35	2.22	good
BI.MRVT	37.66	56.09	2007-271-01-01-49	-21.21	169.36	94	121	12	SKKSac	4-25s	0.9	33	35	1.03	1.18	-0.76	0	fair
BI.MRVT	37.66	56.09	2007-271-01-35-51	-21.13	169.37	94	121	10	SKKSac	5-20s	0.97	57	14	1.72	0.39	16.82	2.06	fair
BI.MRVT	37.66	56.09	2007-273-05-23-34	-49.27	164.12	127	128	10	PKSdf	5-20s	0.99	44	8	1.84	1.19	19.69	6	fair
BI.MRVT	37.66	56.09	2007-278-07-17-52	-25.19	179.46	92	131	509	SKKSac	4-25s	0.91	61	20	0.62	0.31	-0.76	0	fair
BI.MRVT	37.66	56.09	2007-282-15-03-41	-4.81	152.89	90	98	39	SKSac	4-25s	0.94	55	20	0.72	0.36	-0.76	0	fair
BI.MRVT	37.66	56.09	2007-286-17-45-53	-21.23	169.19	94	121	37	SKKSac	5-20s	0.96	33	9	1.64	0.36	14.03	1.86	fair
BI.MRVT	37.66	56.09	2007-288-12-29-34	-44.8	167.55	121	129	18	SKKSac	4-25s	0.92	45	7	1.74	0.77	-0.76	0	fair
BI.MRVT	37.66	56.09	2007-288-21-28-23	-44.79	167.46	121	129	19	SKKSac	4-25s	0.91	55	15	1.44	0.72	-0.76	0	fair
BI.MRVT	37.66	56.09	2007-289-21-05-43	-25.77	179.53	93	131	509	SKKSac	4-25s	0.91	44	33	0.41	0.41	-0.76	0	fair
BI.MRVT	37.66	56.09	2007-319-15-03-08	-22.87	-70.41	272	132	27	PKSbc	5-20s	0.97	37	14	1.42	0.4	8.66	2.35	fair
BI.MRVT	37.66	56.09	2007-320-03-13-00	-2.31	-77.84	298	125	123	SKKSac	4-25s	Null	Null	Null	Null	Null	-0.76	0	fairNull
BI.MRVT	37.66	56.09	2007-320-03-13-00	-2.31	-77.84	298	125	123	SKSac	4-25s	Null	Null	Null	Null	Null	-0.76	0	fairNull
BI.MRVT	37.66	56.09	2007-323-00-52-12	-21.18	-178.75	87	130	558	PKSbc	5-20s	0.98	28	19	0.96	0.5	9.89	2.55	fair
BI.MRVT	37.66	56.09	2007-324-17-55-51	-22.92	-70.48	272	132	15	PKSbc	4-25s	0.96	53	20	1.13	0.46	-0.76	0	fair
BI.MRVT	37.66	56.09	2007-333-19-00-20	14.94	-61.27	299	101	156	SKSac	4-25s	Null	Null	Null	Null	Null	-0.76	0	fairNull
BI.MRVT	37.66	56.09	2007-347-07-23-39	-23.2	-70.55	272	132	16	PKSbc	4-25s	0.92	56	12	1.13	0.31	-0.76	0	fair
BI.MRVT	37.66	56.09	2007-350-08-09-17	-22.95	-70.18	272	132	45	SKKSac	5-20s	0.96	43	22	0.74	0.31	11.47	3.04	fair
BI.MRVT	37.66	56.09	2007-354-07-55-15	-39.01	178.29	110	135	20	SKKSac	4-25s	0.91	53	10	1.23	0.31	-0.76	0	fair
BI.MRVT	37.66	56.09	2007-354-07-55-15	-39.01	178.29	110	135	20	SKSac	5-20s	0.98	76	15	0.74	0.6	9.18	3.73	fair
BI.MRVT	37.66	56.09	2008-005-11-01-06	51.25	-130.75	4	91	15	SKSac	4-25s	0.94	54	9	0.82	0.15	-0.76	0	fair
BI.MRVT	37.66	56.09	2008-015-17-52-15	-21.98	-179.53	88	130	597	SKKSac	5-20s	0.95	53	32	1.34	0.88	6.91	2.28	fair
BI.MRVT	37.66	56.09	2008-035-17-01-29	-20.17	-70.04	275	130	35	PKSbc	4-25s	0.9	37	8	1.54	0.36	-0.76	0	fair
BI.MRVT	37.66	56.09	2008-035-17-01-29	-20.17	-70.04	275	130	35	PKSbc	4-25s	0.9	39	6	1.44	0.26	-0.76	0	fair
BI.MRVT	37.66	56.09	2008-043-12-50-18	16.36	-94.3	327	119	83	SKSac	4-25s	0.92	50	3	1.85	0.92	-0.76	0	fair
BI.MRVT	37.66	56.09	2008-072-11-23-34	-16.57	167.34	91	117	13	SKSac	4-25s	0.91	58	26	0.72	0.46	-0.76	0	fair
BI.MRVT	37.66	56.09	2008-078-08-22-47	-29.25	-177.44	96	135	25	PKSbc	5-20s	0.96	32	35	1.26	1.44	10.81	3.79	fair
BI.MRVT	37.66	56.09	2008-084-20-39-07	-20.04	-68.96	274	129	120	SKKSac	5-20s	0.99	55	22	1.04	0.4	12.95	2.59	good
BI.MRVT	37.66	56.09	2008-084-20-39-07	-20.04	-68.96	274	129	120	SKSac	5-20s	0.97	17	17	2.22	1.65	7.7	2.85	fair
BI.MRVT	37.66	56.09	2008-100-12-46-12	-20.07	168.89	93	120	33	SKKSac	5-20s	0.99	57	30	0.66	0.41	17.6	3.78	fair
BI.MRVT	37.66	56.09	2008-201-22-39-52	-17.34	-177.31	82	129	391	PKSbc	5-20s	0.94	46	23	0.56	0.4	3.67	2.89	fair
BI.MRVT	37.66	56.09	2008-201-22-39-52	-17.34	-177.31	82	129	391	SKKSac	4-25s	0.94	61	11	1.13	0.51	-0.76	0	fair
BI.MRVT	37.66	56.09	2008-232-16-30-13	-15.09	-173.48	77	131	8	SKSac	5-20s	0.98	65	65	1.56	1.34	8.71	4.84	fair
BI.MRVT	37.66	56.09	2008-239-21-00-36	-7.64	-74.38	291	126	154	SKKSac	4-25s	0.94	58	61	0.62	0.51	-0.76	0	fair
BI.MRVT	37.66	56.09	2008-239-21-00-36	-7.64	-74.38	291	126	154	SKSac	4-25s	0.95	46	52	0.62	1.03	-0.76	0	fair
BI.MRVT	37.66	56.09	2008-241-12-37-35	50.16	-129.63	4	92	12	SKSac	4-25s	0.93	67	35	0.51	0.72	-0.76	0	fair
BI.MRVT	37.66	56.09	2008-243-06-54-07	-6.15	147.26	94	95	75	SKSac	5-20s	0.97	59	46	0.7	0.96	8.37	3.75	fair
BI.MRVT	37.66	56.09	2008-252-03-03-15	-19.96	169.11	93	120	36	SKKSac	4-25s	0.93	53	30	0.62	0.46	-0.76	0	fair
BI.MRVT	37.66	56.09	2008-253-12-22-49	-9.27	158.26	90	105	12	SKSac	4-25s	0.93	30	14	0.92	0.31	-0.76	0	fair
BI.MRVT	37.66	56.09	2008-254-13-08-14	8.09	-38.7	279	89	9	SKKSac	4-25s	0.95	32	6	1.33	0.36	-0.76	0	fair
BI.MRVT	37.66	56.09	2008-273-15-19-31	-29.76	-177.68	96	135	36	PKSbc	5-20s	0.99	31	28	1.1	0.91	18.88	5.06	fair
BI.MRVT	37.66	56.09	2008-279-09-12-36	-30.18	-177.18	97	136	10	SKKSac	4-25s	0.93	52	29	0.72	0.46	-0.76	0	fair
BI.MRVT	37.66	56.09	2008-285-10-40-14	19.16	-64.83	304	101	23	SKSac	5-20s	0.97	83	38	0.6	1.46	9.91	3.79	fair
BI.MRVT	37.66	56.09	2008-293-05-10-33	-21.86	-173.82	84	134	29	SKKSac	5-20s	0.98	64	30	0.8	0.52	3.39	2.56	fair
BI.MRVT	37.66	56.09	2008-344-06-23-59	-31.23	-176.92	98	136	18	PKSbc	4-25s	0.92	42	23	1.03	0.56	-0.76	0	fair
BI.MRVT	37.66	56.09	2009-033-17-53-21	-13.58	-76.56	287	132	21	PKSbc	5-20s	0.98	44	34	0.92	0.82	10.66	3.3	fair
BI.MRVT	37.66	56.09	2009-048-03-30-53	-30.72	-178.62	98	135	13	PKSbc	4-25s	0.94	59	13	1.03	0.31	-0.76	0	fair
BI.MRVT	37.66	56.09	2009-049-21-53-45	-27.42	-176.33	93	135	25	PKSbc	4-25s	0.92	38	29	0.72	0.72	-0.76	0	fair
BI.MRVT	37.66	56.09	2009-049-21-53-45	-27.42	-176.33	93	135	25	SKKSac	5-20s	0.95	38	37	0.78	0.84	11.17	3.99	fair
BI.MRVT	37.66	56.09	2009-091-03-54-58	-3.52	144.1	94	91	10	SKSac	5-20s	0.98	46	44	0.38	2.2	13.51	7.09	good
BI.MRVT	37.66	56.09	2009-107-02-08-08	-19.58	-70.48	276	130	25	PKSbc	5-20s	0.96	41	12	1.46	0.37	11.08	1.88	good
BI.MRVT	37.66	56.09	2009-116-00-06-53	-30.3	-178.58	98	135	131	SKKSac	5-20s	0.95	50	31	0.36	0.52	9.44	4.41	fair
BI.MRVT	37.66	56.09	2009-132-01-26-26	-5.66	149.54	92	96	89	SKSac	5-20s	0.99	56	33	0.46	0.66	8.46	4.91	fair
BI.MRVT	37.66	56.09	2009-136-00-53-51	-31.55	-178.83	99	135	43	PKSbc	5-20s	0.93	52	26	1.06	0.51	6.25	2.32	fair
BI.MRVT	37.66	56.09	2009-153-02-17-03	-17.76	167.95	92	118	15	SKKSac	4-25s	0.91	63	19	1.44	0.77	-0.76	0	fair
BI.MRVT	37.66	56.09	2009-193-06-12-47	-15.04	-70.44	281	128	198	SKKSac	5-20s	0.96	30	10	1.6	0.71	9.5	2.75	fair
BI.MRVT	37.66	56.09	2009-193-06-12-47	-15.04	-70.44	281	128	199	SKKSac	4-25s	0.92	43	24	0.92	0.62	-0.76	0	fair
BI.MRVT	37.66	56.09	2009-193-06-12-47	-15.04	-70.44	281	128	199	SKSac	4-25s	0.91	43	23	0.92	0.62	-0.76	0	good
BI.MRVT	37.66	56.09	2009-217-08-31-40	-45.55	166.36	122	129	10	SKKSac	4-25s	0.94	54	6	1.23	0.31	-0.76	0	good
BI.MRVT	37.66	56.09	2009-222-04-06-31	-11.61	166.09	87	113	35	SKKSac	5-20s	0.99	40	31	0.34	0.52	9.71	6.12	fair
BI.MRVT	37.66	56.09	2009-222-17-46-23	-3.13	143.2	94	90	10	SKSac	4-25s	0.95	61	21	0.82	0.41	-0.76	0	fair
BI.MRVT	37.66	56.09	2009-242-14-51-32	-15.22	-172.57	76	132	11	PKSbc	5-20s	0.96	32	27	0.7	0.5	5.65	2.93	fair
BI.MRVT	37.66	56.09	2009-245-18-00-09	-29.39	-178.96	97	134	257	PKSbc	5-20s	0.99	23	17	1.68	1.15	8.8	3.03	fair
BI.MRVT	37.66	56.09	2009-281-21-16-13	-12.91	166.31	88	114	35	SKKSac	5-20s	0.99	23	43	0.64	0.99	14.42	6.74	fair
BI.MRVT	37.66	56.09	2009-317-03-05-57	-19.39	-70.32	276	130	27	PKSbc	5-20s	0.95	36	20	1.24	0.68	9.99	2.73	fair
BI.MRVT	37.66	56.09	2009-318-19-44-29	-22.96	-66.64	270	129	220	SKKSac	4-25s	0.93	54	26	1.03	0.67	-0.76	0	fair
BI.MRVT	37.66	56.09	2009-318-19-44-29	-22.96	-66.64	270	129	220	SKSac	5-20s	0.95	55	32	0.92	0.67	7.87	2.78	fair
BI.MRVT	37.66	56.09	2009-321-15-30-47	52.12	-131.4	5	90	17	SKSac	4-25s	0.94	60	20	0.72	0.31	-0.76	0	fair
BI.MRVT	37.66	56.09	2009-326-07-48-20	-17.79	-178.43	83	129	523	PKSbc	4-25s	0.92	48	26	0.72	0.51	-0.76	0	fair
BI.MRVT	37.66	56.09	2010-009-05-51-30	-9.13	157.63	90	105	12	SKSac	4-25s	0.93	64	11	1.44	0.51	-0.76	0	fair
BI.MRVT	37.66	56.09	2010-010-00-27-39	40.65	-124.69	1	102	29	SKSac	5-20s	0.94	46	22	1.28	0.5	6.24	1.79	fair
BI.MRVT	37.66	56.09	2010-063-22-39-26	-22.23	-68.33	272	130	114	SKKSac	4-25s	0.92	23	9	1.33	0.56	-0.76	0	good
BI.MRVT	37.66	56.09	2010-063-22-39-26	-22.23	-68.33	272	130	114	SKSac	5-20s	0.95	31	30	1.14	0.96	5.61	2.59	fair
BI.MRVT	37.66	56.09	2010-070-14-39-43	-34.29	-71.89	258	138	11	PKSbc	4-25s	0.95	39	8	1.33	0.26	-0.76	0	good
BI.MRVT	37.66	56.09	2010-079-14-00-49	-3.36	152.25	89	97	415	SKSac	4-25s	0.94	54	15	0.82	0.36	-0.76	0	good
BI.MRVT	37.66	56.09	2010-107-23-15-22	-6.67	147.29	95	95	53	SKSac	4-25s	0.91	59	17	0.51	0.15	-0.76	0	good
BI.MRVT	37.66	56.09	2010-123-23-09-44	-38.07	-73.45	253	141	19	SKKSac	4-25s	0.9	50	33	1.13	1.18	-0.76	0	fair
BI.MRVT	37.66	56.09	2010-143-22-46-52	-13.93	-74.35	285	130	101	PKSbc	4-25s	0.93	32	14	1.23	0.77	-0.76	0	fair
BI.MRVT	37.66	56.09	2010-144-16-18-29	-8.09	-71.56	288	124	581	SKKSac	4-25s	0.94	74	66	0.62	0.46	-0.76	0	fair
BI.MRVT	37.66	56.09	2010-147-17-14-46	-13.7	166.64	89	114	31	SKKSac	4-25s	0.95	60	31	0.82	0.72	-0.76	0	fair
BI.MRVT	37.66	56.09	2010-181-04-31-02	-23.31	179.12	91	130	581	PKSbc	4-25s	0.94	56	11	0.72	0.21	-0.76	0	fair
BI.MRVT	37.66	56.09	2010-193-00-11-21	-22.15	-68.22	272	130	115	SKSac	5-20s	0.95	26	12	1.8	0.75	7.97	1.95	fair
BI.MRVT	37.66	56.09	2010-199-13-04-09	-5.97	150.43	92	97	28	SKSac	4-25s	0.95	61	17	0.72	0.31	-0.76	0	good
BI.MRVT	37.66	56.09	2010-224-11-54-15	-1.27	-77.31	299	124	207	SKKSac	4-25s	Null	Null	Null	Null	Null	-0.76	0	fairNull
BI.MRVT	37.66	56.09	2010-224-11-54-15	-1.27	-77.31	299	124	207	SKSac	4-25s	Null	Null	Null	Null	Null	-0.76	0	fairNull
BI.MRVT	37.66	56.09	2010-227-15-09-29	-5.69	148.34	93	95	175	SKSac	4-25s	0.91	41	22	0.82	0.41	-0.76	0	good
BI.MRVT	37.66	56.09	2010-228-19-35-49	-20.8	-178.83	86	130	603	PKSbc	5-20s	0.97	32	16	1.18	0.44	7.73	1.79	fair
BI.MRVT	37.66	56.09	2010-247-08-52-04	-17.37	-174	79	132	69	SKKSac	5-20s	0.97	40	17	0.26	0.2	6.54	4.97	fair
BI.MRVT	37.66	56.09	2010-247-08-52-04	-17.37	-174	79	132	69	SKSac	5-20s	0.98	58	49	1.1	1.01	10.33	3.55	fair
BI.MRVT	37.66	56.09	2010-327-09-01-06	-5.96	148.97	93	96	68	SKSac	5-20s	0.98	36	15	1.04	0.39	14.93	2.55	fair
BI.MRVT	37.66	56.09	2011-009-10-03-43	-19.16	168.31	93	119	22	SKKSac	4-25s	0.91	27	14	1.33	0.67	-0.76	0	fair
BI.MRVT	37.66	56.09	2011-009-10-03-43	-19.16	168.31	93	119	22	SKSac	5-20s	0.96	43	39	0.88	1.98	8.2	3.75	fair
BI.MRVT	37.66	56.09	2011-038-19-53-42	-7.15	155.18	90	102	415	SKSac	5-20s	0.97	23	40	1.36	1.44	8.44	3.19	fair
BI.MRVT	37.66	56.09	2011-065-12-31-59	-18.02	-69.36	277	129	118	SKKSac	4-25s	0.95	51	30	0.92	0.62	-0.76	0	fair
BI.MRVT	37.66	56.09	2011-093-14-07-09	-17.64	-178.59	83	128	551	SKKSac	5-20s	0.95	43	43	0.76	1.41	6.21	2.81	fair
BI.MRVT	37.66	56.09	2011-097-13-11-22	17.21	-94.34	327	119	166	SKSac	5-20s	Null	Null	Null	Null	Null	8.69	8.11	goodNull
BI.MRVT	37.66	56.09	2011-108-13-03-02	-34.34	179.87	104	135	86	SKSac	5-20s	0.97	44	25	1.2	0.84	8.47	2.37	fair
BI.MRVT	37.66	56.09	2011-113-04-16-54	-10.38	161.2	89	108	79	SKSdf	5-20s	0.98	53	27	0.4	0.42	6.04	4.74	fair
BI.MRVT	37.66	56.09	2011-159-03-06-22	-17.08	-69.52	278	128	146	SKKSac	4-25s	0.93	61	14	1.13	0.41	-0.76	0	fair
BI.MRVT	37.66	56.09	2011-167-00-03-35	-5.93	151.04	92	98	16	SKSac	5-20s	Null	Null	Null	Null	Null	6.73	4.27	fairNull
BI.MRVT	37.66	56.09	2011-171-16-36-01	-21.7	-68.23	272	130	128	SKKSac	5-20s	0.94	45	27	1.28	0.71	6.43	2.02	fair
BI.MRVT	37.66	56.09	2011-171-16-36-01	-21.7	-68.23	272	130	128	SKSac	5-20s	0.99	33	29	0.74	0.57	18.93	4.13	fair
BI.MRVT	37.66	56.09	2011-187-19-03-18	-29.54	-176.34	95	136	17	PKSbc	4-25s	0.91	42	19	0.92	0.46	-0.76	0	fair
BI.MRVT	37.66	56.09	2011-190-19-35-18	-29.44	-177.01	96	135	15	PKSbc	5-20s	0.95	26	25	1.24	0.86	20.4	3.96	fair
BI.MRVT	37.66	56.09	2011-231-03-54-26	-16.52	-177	81	129	407	SKKSac	5-20s	0.97	47	35	0.52	0.8	4.13	3.16	fair
BI.MRVT	37.66	56.09	2011-236-17-46-11	-7.64	-74.53	291	126	147	SKKSac	4-25s	0.94	32	12	1.64	1.18	-0.76	0	fair
BI.MRVT	37.66	56.09	2011-236-17-46-11	-7.64	-74.53	291	126	147	SKSac	5-20s	0.97	31	18	2.02	1.59	11.33	3.94	fair
BI.MRVT	37.66	56.09	2011-236-23-06-17	-18.16	167.73	92	118	13	SKKSac	5-20s	0.95	42	51	1.32	1.5	6.03	2.2	fair
BI.MRVT	37.66	56.09	2011-236-23-06-17	-18.16	167.73	92	118	13	SKSac	5-20s	0.99	19	13	1.03	0.71	15.31	3.46	fair
BI.MRVT	37.66	56.09	2011-245-13-47-09	-28.4	-63.03	262	129	579	PKSbc	4-25s	0.95	38	5	1.33	0.15	-0.76	0	good
BI.MRVT	37.66	56.09	2011-252-19-41-34	49.53	-126.89	2	93	22	SKSac	4-25s	0.95	58	12	1.03	0.31	-0.76	0	fair
BI.MRVT	37.66	56.09	2011-287-03-35-14	-6.57	147.88	94	95	37	SKSac	4-25s	0.95	50	15	0.82	0.15	-0.76	0	good
BI.MRVT	37.66	56.09	2011-341-22-23-09	-27.9	-70.92	266	135	20	PKSbc	4-25s	0.93	53	14	1.03	0.36	-0.76	0	fair
BI.MRVT	37.66	56.09	2011-348-05-04-58	-7.55	146.81	96	95	135	SKSac	4-25s	0.91	51	22	0.72	0.26	-0.76	0	fair
BI.MRVT	37.66	56.09	2012-021-18-47-11	14.87	-93	325	120	45	SKKSac	5-20s	0.99	39	21	1.42	0.91	12.93	3.54	fair
BI.MRVT	37.66	56.09	2012-023-16-04-52	-36.41	-73.03	256	140	20	PKSdf	5-20s	0.97	31	21	1.3	0.49	5.64	1.68	fair
BI.MRVT	37.66	56.09	2012-024-00-52-05	-24.98	178.52	93	130	580	PKSbc	5-20s	0.94	63	38	1.06	0.84	5.89	2.37	fair
BI.MRVT	37.66	56.09	2012-024-00-52-05	-24.98	178.52	93	130	580	SKSac	5-20s	0.95	29	62	0.8	3.22	6.37	3.83	fair
BI.MRVT	37.66	56.09	2012-024-16-31-07	-56.34	-27.72	219	117	8	SKSac	4-25s	0.93	24	6	1.95	0.72	-0.76	0	fair
BI.MRVT	37.66	56.09	2012-030-05-11-00	-14.17	-75.64	285	131	43	PKSbc	5-20s	0.93	33	15	1.52	0.84	7.87	2.66	fair
BI.MRVT	37.66	56.09	2012-069-07-09-50	-19.12	169.61	92	120	16	SKKSac	5-20s	0.95	46	10	1.34	0.2	15.51	1.7	good
BI.MRVT	37.66	56.09	2012-081-22-15-06	-6.24	145.96	95	94	118	SKSac	5-20s	0.97	48	40	0.6	1.16	7.09	3.67	fair
BI.MRVT	37.66	56.09	2012-093-17-36-42	16.39	-98.32	331	121	9	SKSac	5-20s	0.99	53	7	1.88	0.62	37.05	5.84	fair
BI.MRVT	37.66	56.09	2012-108-07-13-49	-5.46	147.12	94	94	198	SKSac	4-25s	0.95	66	24	0.82	0.62	-0.76	0	fair
BI.MRVT	37.66	56.09	2012-114-17-36-21	-28.56	-177.41	95	135	114	SKKSac	5-20s	0.97	46	34	0.78	0.96	7.96	3.25	fair
BI.MRVT	37.66	56.09	2012-135-10-00-40	-17.68	-69.59	277	129	106	SKKSac	4-25s	0.91	44	12	1.44	0.46	-0.76	0	fair
BI.MRVT	37.66	56.09	2012-149-05-07-23	-28.04	-63.09	262	129	587	PKSbc	4-25s	0.94	36	6	1.23	0.21	-0.76	0	good
BI.MRVT	37.66	56.09	2012-159-04-05-04	-36.07	-70.57	255	138	8	SKKSac	5-20s	0.98	31	11	1.34	0.23	12.99	1.73	good
BI.MRVT	37.66	56.09	2012-159-16-03-18	-15.88	-72.41	281	130	110	SKKSac	5-20s	0.99	40	24	0.76	0.5	16.24	3.84	fair
BI.MRVT	37.66	56.09	2012-185-10-36-15	-40.02	173.76	113	132	229	PKSbc	5-20s	0.99	55	8	1.02	0.18	20.92	2.24	good
BI.MRVT	37.66	56.09	2012-189-03-35-28	-4.65	153.3	89	99	35	SKSac	4-25s	0.95	38	12	0.72	0.21	-0.76	0	good
BI.MRVT	37.66	56.09	2012-207-11-20-27	-9.69	159.73	89	107	20	SKSac	4-25s	0.93	56	19	0.62	0.31	-0.76	0	good
BI.MRVT	37.66	56.09	2012-210-20-03-56	-4.65	153.17	89	98	41	SKKSac	5-20s	0.97	50	27	0.9	0.39	7.01	2.71	fair
BI.MRVT	37.66	56.09	2012-210-20-03-56	-4.65	153.17	89	98	41	SKSac	4-25s	0.93	44	15	0.82	0.21	-0.76	0	good
BI.MRVT	37.66	56.09	2012-215-09-38-30	-8.41	-74.26	290	127	145	SKKSac	4-25s	0.96	37	10	1.13	0.56	-0.76	0	fair
BI.MRVT	37.66	56.09	2012-240-04-37-19	12.14	-88.59	319	120	28	SKKSac	5-20s	Null	Null	Null	Null	Null	7.35	3.59	fairNull
BI.MRVT	37.66	56.09	2012-319-19-02-06	-29.12	-71.19	265	136	63	SKKSac	5-20s	0.97	45	26	0.48	0.52	5.1	4.05	fair
BI.MRVT	37.66	56.09	2012-324-09-44-34	-5.71	151.6	91	98	13	SKSac	4-25s	0.94	44	17	0.82	0.31	-0.76	0	fair
BI.MRVT	37.66	56.09	2013-069-22-51-50	-6.6	148.17	94	96	28	SKSac	4-25s	0.95	43	16	0.72	0.26	-0.76	0	fair
BI.MRVT	37.66	56.09	2013-106-22-55-26	-3.21	142.54	95	89	13	SKSac	4-25s	0.92	68	24	0.92	0.62	-0.76	0	fair
BI.MRVT	37.66	56.09	2013-116-06-53-28	-28.68	-178.92	96	134	351	SKKSac	4-25s	0.92	60	16	0.72	0.26	-0.76	0	fair
BI.MRVT	37.66	56.09	2013-144-11-10-48	-24.34	-174.92	88	135	10	PKSbc	4-25s	0.92	65	13	1.13	0.62	-0.76	0	fair
BI.MRVT	37.66	56.09	2013-175-22-04-13	10.7	-42.59	284	90	10	SKSac	4-25s	0.94	37	13	1.03	0.51	-0.76	0	fair
BI.MRVT	37.66	56.09	2013-188-18-35-30	-3.92	153.93	88	99	386	SKSac	4-25s	0.91	50	13	0.72	0.15	-0.76	0	fair
BI.MRVT	37.66	56.09	2013-188-20-30-06	-6.03	149.71	93	97	56	SKSac	4-25s	0.93	39	20	0.72	0.31	-0.76	0	good
BI.MRVT	37.66	56.09	2013-198-02-37-43	-15.66	-71.74	281	129	7	PKSdf	5-20s	0.96	57	29	0.96	0.47	11.34	3.08	fair
BI.MRVT	37.66	56.09	2013-198-02-37-43	-15.66	-71.74	281	129	7	SKKSac	5-20s	0.97	29	19	1.76	1.24	11.23	3.38	fair
BI.MRVT	37.66	56.09	2013-224-04-16-47	-30.63	-179.68	99	134	340	PKSbc	5-20s	0.98	46	25	0.98	0.64	6.89	2.53	fair
BI.MRVT	37.66	56.09	2013-246-20-19-06	51.24	-130.4	4	91	2	SKSac	5-20s	0.99	42	36	0.88	0.58	3.43	1.95	fair
BI.MRVT	37.66	56.09	2013-268-16-42-43	-15.84	-74.51	283	131	40	PKSbc	4-25s	0.91	39	15	0.92	0.41	-0.76	0	fair
BI.MRVT	37.66	56.09	2013-273-05-55-55	-30.93	-178.32	98	135	41	PKSbc	5-20s	0.96	58	23	1.12	0.39	17.04	3.29	fair
BI.MRVT	37.66	56.09	2013-284-21-25-00	-30.66	-178.48	98	135	151	PKSbc	5-20s	0.95	68	21	1.3	0.54	14.44	3	fair
BI.MRVT	37.66	56.09	2013-285-02-10-27	10.9	-62.31	297	105	63	SKSac	4-25s	0.91	59	62	0.72	0.62	-0.76	0	fair
BI.MRVT	37.66	56.09	2015-127-07-10-19	-7.22	154.56	91	101	10	SKSac	4-25s	0.96	47	22	0.72	0.26	-0.76	0	fair
BI.MRVT	37.66	56.09	2015-172-21-28-16	-20.43	-178.33	86	130	562	PKSbc	5-20s	0.98	33	19	1.02	0.45	7.59	2.04	fair
BI.MRVT	37.66	56.09	2015-181-03-39-29	-5.45	151.55	91	98	43	SKSac	5-20s	0.99	28	13	1.26	0.49	11.35	2.24	fair
BI.MRVT	37.66	56.09	2015-191-04-12-42	-9.31	158.4	90	105	12	SKSac	4-25s	0.94	41	21	0.92	0.46	-0.76	0	fair
BI.MRVT	37.66	56.09	2015-222-04-12-15	-9.34	158.05	90	105	22	SKSac	4-25s	0.93	63	16	0.82	0.36	-0.76	0	fair
BI.MRVT	37.66	56.09	2015-224-18-49-24	-9.33	157.88	90	105	6	SKSac	4-25s	0.94	67	14	0.92	0.51	-0.76	0	good
BI.MRVT	37.66	56.09	2015-227-07-47-06	-10.9	163.82	88	111	8	SKSac	4-25s	0.93	32	34	0.82	0.97	-0.76	0	fair
BI.MRVT	37.66	56.09	2015-250-08-46-09	-24.24	179.13	92	130	535	SKSac	5-20s	0.99	30	11	1.24	0.36	20.39	2.6	fair
BI.MRVT	37.66	56.09	2015-259-14-03-22	-6.01	151.48	91	98	6	SKSac	5-20s	0.99	33	17	1.06	0.48	10.67	2.41	good
BI.MRVT	37.66	56.09	2015-260-03-55-15	-31.42	-71.69	262	137	27	PKSbc	4-25s	0.94	33	22	1.13	0.56	-0.76	0	fair
BI.MRVT	37.66	56.09	2015-260-04-10-27	-31.52	-71.8	262	137	23	PKSbc	5-20s	0.94	35	9	1.52	0.21	18.88	1.99	fair
BI.MRVT	37.66	56.09	2015-261-09-10-44	-32.37	-72.23	261	138	8	SKKSac	5-20s	0.98	34	16	0.92	0.19	37.84	3.95	fair
BI.MRVT	37.66	56.09	2015-262-05-06-47	-29.64	-72.08	265	137	6	PKSbc	4-25s	0.95	44	15	1.03	0.36	-0.76	0	good
BI.MRVT	37.66	56.09	2015-264-05-39-34	-31.58	-71.74	262	137	30	PKSbc	5-20s	0.98	42	8	1.46	0.18	16.26	1.35	good
BI.MRVT	37.66	56.09	2015-264-17-40-00	-31.73	-71.38	262	137	35	PKSbc	5-20s	0.94	30	16	1.3	0.45	7.66	1.82	fair
BI.MRVT	37.66	56.09	2015-265-07-13-00	-31.44	-71.27	262	137	58	PKSbc	5-20s	0.98	35	16	1.24	0.35	8.59	1.72	good
BI.MRVT	37.66	56.09	2015-269-02-51-18	-30.81	-71.32	263	136	46	PKSbc	5-20s	0.96	39	17	1.48	0.46	7.15	1.6	fair
BI.MRVT	37.66	56.09	2015-293-21-52-02	-14.86	167.3	89	116	135	SKKSac	5-20s	0.96	41	22	0.88	0.35	12.97	2.87	good
BI.MRVT	37.66	56.09	2015-293-21-52-02	-14.86	167.3	89	116	135	SKSac	4-25s	0.94	24	28	0.62	0.62	-0.76	0	good
BI.MRVT	37.66	56.09	2015-311-07-04-31	-29.46	-72.3	265	137	13	PKSbc	4-25s	0.93	29	25	0.62	0.41	-0.76	0	fair
BI.MRVT	37.66	56.09	2015-311-07-04-31	-29.46	-72.3	265	137	13	SKKSac	5-20s	0.98	24	21	1.22	0.67	11.35	2.71	fair
BI.MRVT	37.66	56.09	2015-311-07-31-43	-30.88	-71.45	263	137	46	PKSbc	5-20s	0.93	36	31	1.16	0.78	6.63	2.76	fair
BI.MRVT	37.66	56.09	2015-322-18-31-04	-8.9	158.42	90	105	13	SKSac	4-25s	0.93	50	32	0.72	0.67	-0.76	0	fair
BI.MRVT	37.66	56.09	2015-331-21-00-22	-24.83	-70.6	270	133	34	PKSbc	4-25s	0.91	34	13	1.23	0.41	-0.76	0	good
BI.MRVT	37.66	56.09	2015-351-19-49-53	15.8	-93.63	326	120	85	SKSac	5-20s	Null	Null	Null	Null	Null	16.94	6.77	goodNull
BI.MRVT	37.66	56.09	2016-026-03-10-20	-5.3	153.25	90	99	26	SKSac	5-20s	0.99	32	12	1.1	0.33	12.24	1.99	fair
BI.MRVT	37.66	56.09	2016-039-16-19-12	-6.62	154.74	90	101	29	SKSac	4-25s	0.95	41	22	0.62	0.31	-0.76	0	good
BI.MRVT	37.66	56.09	2016-041-00-33-05	-30.57	-71.58	263	137	29	PKSbc	5-20s	0.94	37	13	1.72	0.38	9.11	1.47	good
BI.MRVT	37.66	56.09	2016-106-14-11-26	13.4	-92.37	323	121	22	SKKSac	5-20s	Null	Null	Null	Null	Null	13.07	7.56	goodNull
BI.MRVT	37.66	56.09	2016-141-18-14-04	-25.57	129.88	120	94	10	SKSac	4-25s	0.93	61	18	0.82	0.41	-0.76	0	good
BI.MRVT	37.66	56.09	2016-149-05-38-50	-21.97	-178.2	87	131	405	PKSbc	4-25s	0.93	26	9	1.13	0.31	-0.76	0	good
BI.MRVT	37.66	56.09	2016-166-13-49-22	-18.76	168.83	92	119	111	SKSac	4-25s	0.9	66	13	1.03	0.46	-0.76	0	good
BI.MRVT	37.66	56.09	2016-207-19-38-44	-2.95	147.97	91	93	7	SKSac	4-25s	0.93	16	33	1.13	1.33	-0.76	0	fair
BI.MRVT	37.66	56.09	2016-217-14-15-12	-22.33	-66.01	270	128	270	SKKSac	4-25s	0.96	71	27	1.13	0.92	-0.76	0	fair
BI.MRVT	37.66	56.09	2016-217-14-15-12	-22.33	-66.01	270	128	270	SKSac	4-25s	0.92	39	25	0.92	0.51	-0.76	0	fair
BI.MRVT	37.66	56.09	2016-244-03-11-34	-3.68	152.79	89	98	476	SKSac	4-25s	0.94	35	20	0.82	0.36	-0.76	0	fair
BI.MRVT	37.66	56.09	2016-309-16-20-43	-35.1	-71	257	138	90	SKKSac	4-25s	0.91	33	16	1.13	0.36	-0.76	0	good
BI.NASN	32.8	52.81	2004-128-01-26-42	-21.99	170.28	96	124	14	SKKSac	5-20s	0.94	-31	23	1.72	0.82	8.39	1.99	fair
BI.NASN	32.8	52.81	2004-154-08-50-37	-32.88	-179.45	105	136	43	PKSbc	5-20s	0.98	-58	44	1.42	1.06	8.89	3.81	fair
BI.NASN	32.8	52.81	2004-197-04-27-08	-17.81	-178.7	85	132	560	PKSbc	4-25s	0.95	-66	9	1.23	0.36	-2.57	0	good
BI.NASN	32.8	52.81	2004-197-04-27-12	-17.64	-178.62	85	132	560	PKSbc	4-25s	0.95	-67	7	1.33	0.31	-2.57	0	good
BI.NASN	32.8	52.81	2004-197-04-27-14	-17.66	-178.76	85	131	566	PKSbc	4-25s	0.93	-67	8	1.33	0.31	-2.57	0	good
BI.NASN	32.8	52.81	2004-250-12-42-59	-55.37	-28.98	218	112	10	SKKSac	4-25s	Null	Null	Null	Null	Null	-2.57	0	fairNull
BI.NASN	32.8	52.81	2004-255-21-52-38	-57.98	-25.34	214	111	63	SKKSac	5-20s	Null	Null	Null	Null	Null	10.55	6	goodNull
BI.NASN	32.8	52.81	2004-300-22-53-07	-57.07	-24.68	215	111	10	SKKSac	5-20s	0.98	-69	41	1.74	2.28	7.34	3.85	fair
BI.NASN	32.8	52.81	2004-326-11-41-07	15.68	-61.71	297	101	14	SKKSac	5-20s	Null	Null	Null	Null	Null	14.91	7.8	goodNull
BI.NASN	32.8	52.81	2004-326-11-41-07	15.68	-61.71	297	101	14	SKSac	5-20s	Null	Null	Null	Null	Null	20.21	10.37	goodNull
BI.NASN	32.8	52.81	2005-016-08-25-04	-25.53	-176.3	94	137	16	PKSbc	4-25s	0.91	-62	9	1.95	0.62	-2.57	0	fair
BI.NASN	32.8	52.81	2005-038-20-02-17	-4.53	153.19	88	101	37	SKSac	4-25s	0.96	-61	4	1.74	0.21	-2.57	0	good
BI.NASN	32.8	52.81	2005-078-17-34-46	-21.89	-179.55	90	133	598	SKKSac	5-20s	0.98	-41	19	1.1	0.43	8.98	2.01	fair
BI.NASN	32.8	52.81	2005-101-17-08-53	-21.98	170.61	96	124	68	SKKSac	4-25s	0.91	-67	10	2.05	0.97	-2.57	0	fair
BI.NASN	32.8	52.81	2005-138-09-10-53	-56.41	-26.86	216	111	102	SKKSac	5-20s	Null	Null	Null	Null	Null	13.6	5.75	goodNull
BI.NASN	32.8	52.81	2005-138-10-27-06	-15.32	-173.24	79	135	10	PKSbc	5-20s	0.98	-60	25	0.98	0.66	9.5	3.48	fair
BI.NASN	32.8	52.81	2005-155-14-50-46	-6.32	146.85	93	97	26	SKSac	4-25s	0.9	-62	4	1.64	0.31	-2.57	0	fair
BI.NASN	32.8	52.81	2005-164-22-44-33	-19.99	-69.2	269	127	115	SKKSac	5-20s	Null	Null	Null	Null	Null	10.69	4.41	goodNull
BI.NASN	32.8	52.81	2005-164-22-44-33	-19.99	-69.2	269	127	116	SKKSac	4-25s	0.94	-44	32	0.72	0.72	-2.57	0	fair
BI.NASN	32.8	52.81	2005-164-22-44-33	-19.99	-69.2	269	127	116	SKSac	4-25s	0.94	-46	34	0.72	0.72	-2.57	0	fair
BI.NASN	32.8	52.81	2005-166-10-13-59	-4.59	153.19	88	101	75	SKSac	4-25s	0.93	-60	3	1.85	0.15	-2.57	0	good
BI.NASN	32.8	52.81	2005-269-01-55-37	-5.68	-76.4	288	126	115	SKKSac	4-25s	0.94	-85	78	1.95	1.23	-2.57	0	fair
BI.NASN	32.8	52.81	2005-272-15-50-24	-5.44	151.84	90	101	25	SKSac	4-25s	0.94	-58	5	1.74	0.26	-2.57	0	fair
BI.NASN	32.8	52.81	2005-278-10-07-22	-20.54	-174.28	86	137	15	PKSbc	4-25s	0.92	-68	6	1.74	0.41	-2.57	0	good
BI.NASN	32.8	52.81	2005-341-23-32-51	-30.01	-177.64	100	137	21	PKSbc	5-20s	0.96	-66	66	1.32	2.27	9.03	4.88	fair
BI.NASN	32.8	52.81	2006-002-22-13-40	-19.93	-178.18	87	133	583	PKSbc	4-25s	0.94	-69	8	1.44	0.41	-2.57	0	fair
BI.NASN	32.8	52.81	2006-033-12-48-43	-17.75	-178.39	85	132	598	PKSbc	4-25s	0.93	-64	9	1.33	0.31	-2.57	0	good
BI.NASN	32.8	52.81	2006-049-15-59-22	-5.19	152.05	89	101	44	SKSac	4-25s	0.91	-64	10	1.54	0.51	-2.57	0	good
BI.NASN	32.8	52.81	2006-057-03-08-27	-23.61	-179.99	93	133	535	SKKSac	5-20s	0.96	-70	10	1.76	0.68	11.32	2.85	fair
BI.NASN	32.8	52.81	2006-083-12-27-05	-3.25	143.14	93	92	12	SKSac	4-25s	0.92	-66	5	1.54	0.36	-2.57	0	fair
BI.NASN	32.8	52.81	2006-090-13-21-00	-29.43	-176.77	99	138	13	PKSbc	4-25s	0.93	-64	40	1.03	1.59	-2.57	0	fair
BI.NASN	32.8	52.81	2006-090-13-21-00	-29.43	-176.77	99	138	13	SKKSac	4-25s	0.91	-59	12	2.05	0.87	-2.57	0	fair
BI.NASN	32.8	52.81	2006-219-22-18-55	-15.8	167.79	91	119	150	SKSac	4-25s	0.9	-61	22	1.03	0.62	-2.57	0	fair
BI.NASN	32.8	52.81	2006-237-00-44-46	-24.4	-67.03	263	127	184	SKSac	5-20s	Null	Null	Null	Null	Null	7.71	3.93	fairNull
BI.NASN	32.8	52.81	2006-276-18-03-13	-18.84	169	93	122	161	SKKSac	5-20s	0.95	-29	38	1.46	1.38	6.3	2.34	fair
BI.NASN	32.8	52.81	2006-276-18-03-13	-18.84	169	93	122	161	SKSac	5-20s	0.96	-62	9	0.46	1.44	12.93	3.8	fair
BI.NASN	32.8	52.81	2006-290-01-25-12	-5.88	150.98	91	100	32	SKSac	4-25s	0.92	-58	8	1.64	0.36	-2.57	0	good
BI.NASN	32.8	52.81	2006-291-10-45-32	-15.05	167.27	90	118	115	SKSac	4-25s	0.94	-61	9	1.54	0.41	-2.57	0	good
BI.NASN	32.8	52.81	2006-311-17-38-33	-6.48	151.19	91	101	11	SKSac	4-25s	0.93	-57	9	1.64	0.46	-2.57	0	good
BI.NASN	32.8	52.81	2007-031-03-15-52	-29.78	-178	100	137	34	PKSbc	5-20s	0.98	-67	8	1.9	0.81	8.52	3.78	fair
BI.NASN	32.8	52.81	2007-059-23-13-15	-55.24	-29.14	218	112	10	SKKSac	5-20s	Null	Null	Null	Null	Null	7.18	3.81	goodNull
BI.NASN	32.8	52.81	2007-092-12-02-23	-8.71	157.62	89	107	14	SKSac	4-25s	0.93	-63	16	1.33	0.62	-2.57	0	fair
BI.NASN	32.8	52.81	2007-094-06-34-35	-7.76	156.49	89	106	17	SKSac	4-25s	0.9	-67	5	1.95	0.36	-2.57	0	good
BI.NASN	32.8	52.81	2007-094-11-00-27	-20.71	168.83	95	122	13	SKKSac	4-25s	0.9	-66	13	1.64	0.92	-2.57	0	fair
BI.NASN	32.8	52.81	2007-094-11-00-27	-20.71	168.83	95	122	13	SKSac	4-25s	0.92	-64	14	1.44	0.77	-2.57	0	fair
BI.NASN	32.8	52.81	2007-111-07-12-48	-3.55	151.27	88	99	407	SKSac	4-25s	0.92	-59	7	2.05	0.41	-2.57	0	fair
BI.NASN	32.8	52.81	2007-115-13-34-14	-14.29	166.86	90	118	55	SKSac	4-25s	0.96	-66	8	2.15	0.67	-2.57	0	good
BI.NASN	32.8	52.81	2007-126-21-11-52	-19.4	-179.35	87	132	676	SKKSac	5-20s	0.99	-61	5	1.96	0.28	16.93	1.34	good
BI.NASN	32.8	52.81	2007-196-09-27-34	-15.38	168.6	90	120	8	SKKSac	5-20s	0.99	-27	48	0.9	1.31	8.92	3.39	fair
BI.NASN	32.8	52.81	2007-199-00-07-35	-26.3	-177.74	95	136	10	PKSbc	4-25s	Null	Null	Null	Null	Null	-2.57	0	fairNull
BI.NASN	32.8	52.81	2007-204-00-08-32	-4.47	149.85	90	98	572	SKSac	4-25s	0.95	-46	15	1.13	0.36	-2.57	0	good
BI.NASN	32.8	52.81	2007-238-12-37-31	-17.46	-174.34	82	135	127	SKKSac	5-20s	0.98	-67	11	1.84	0.54	9.08	1.54	fair
BI.NASN	32.8	52.81	2007-270-19-57-44	-21.1	169.28	95	123	9	SKSac	5-20s	0.98	-65	17	1.34	0.7	12.12	3.01	fair
BI.NASN	32.8	52.81	2007-278-07-17-52	-25.19	179.46	95	133	509	SKKSac	5-20s	0.99	-61	8	1.16	0.41	13.32	4.22	fair
BI.NASN	32.8	52.81	2007-282-15-03-41	-4.81	152.89	89	101	39	SKSac	4-25s	0.94	-58	5	1.74	0.26	-2.57	0	good
BI.NASN	32.8	52.81	2007-320-03-13-00	-2.31	-77.84	293	125	122	SKKSac	5-20s	Null	Null	Null	Null	Null	19.26	6.65	goodNull
BI.NASN	32.8	52.81	2007-322-05-40-12	-22.64	-66.32	264	126	246	SKKSac	5-20s	0.97	-53	39	0.56	0.94	7.97	3.79	fair
BI.NASN	32.8	52.81	2007-323-00-52-12	-21.18	-178.75	89	133	558	PKSbc	5-20s	0.93	-52	46	0.86	1.72	5.87	3.01	fair
BI.NASN	32.8	52.81	2007-333-19-00-20	14.94	-61.27	296	101	156	SKSac	4-25s	Null	Null	Null	Null	Null	-2.57	0	fairNull
BI.NASN	32.8	52.81	2007-347-15-51-27	-15.21	-172.37	78	136	17	PKSbc	5-20s	0.97	-65	26	1.08	1.04	7.59	3.19	fair
BI.NASN	32.8	52.81	2007-354-07-55-15	-39.01	178.29	114	136	20	PKSbc	5-20s	0.97	-54	74	1.32	2.67	7.84	4.83	fair
BI.NASN	32.8	52.81	2007-356-07-11-08	-2.41	139.07	94	88	20	SKSac	4-25s	0.95	-63	6	1.95	0.51	-2.57	0	good
BI.NASN	32.8	52.81	2008-043-12-50-18	16.36	-94.3	322	122	83	SKKSac	4-25s	Null	Null	Null	Null	Null	-2.57	0	fairNull
BI.NASN	32.8	52.81	2008-072-11-23-34	-16.57	167.34	92	119	13	SKSac	4-25s	0.93	-71	7	1.85	0.62	-2.57	0	good
BI.NASN	32.8	52.81	2008-109-20-39-07	-17.34	-179.02	85	131	554	PKSbc	4-25s	0.92	-67	8	1.54	0.41	-2.57	0	good
BI.NASN	32.8	52.81	2008-190-09-13-07	-15.99	-71.75	275	127	123	SKKSac	5-20s	Null	Null	Null	Null	Null	9.66	5.49	goodNull
BI.NASN	32.8	52.81	2008-201-09-27-01	-11.04	164.49	88	114	11	SKSac	5-20s	0.98	-41	14	1.28	0.38	9.31	1.59	fair
BI.NASN	32.8	52.81	2008-201-22-39-52	-17.34	-177.31	84	132	391	PKSbc	5-20s	0.98	-67	13	1.5	0.52	10.96	1.99	fair
BI.NASN	32.8	52.81	2008-201-22-39-52	-17.34	-177.31	84	132	391	SKKSac	4-25s	0.95	-67	4	2.05	0.26	-2.57	0	good
BI.NASN	32.8	52.81	2008-243-06-54-07	-6.15	147.26	93	97	75	SKSac	4-25s	0.91	-63	5	1.64	0.36	-2.57	0	good
BI.NASN	32.8	52.81	2008-252-18-52-06	-13.5	166.97	89	117	110	SKSac	5-20s	0.95	-34	17	1.92	0.76	6.32	1.27	fair
BI.NASN	32.8	52.81	2008-293-05-10-33	-21.86	-173.82	87	137	29	PKSbc	4-25s	0.91	-70	15	1.03	0.56	-2.57	0	fair
BI.NASN	32.8	52.81	2008-296-12-55-57	-18.41	-175.35	84	135	233	PKSbc	4-25s	0.94	-68	26	0.82	0.67	-2.57	0	fair
BI.NASN	32.8	52.81	2008-309-18-35-45	-17.14	168.46	92	120	205	SKKSac	5-20s	0.95	-50	35	0.94	0.71	8.95	3.15	fair
BI.NASN	32.8	52.81	2008-309-18-35-45	-17.14	168.46	92	120	205	SKSac	5-20s	0.97	-54	19	1.4	0.56	8.12	2.08	fair
BI.NASN	32.8	52.81	2008-313-07-49-59	-15.22	-174.23	79	134	121	PKSbc	5-20s	0.96	-57	22	1.3	0.56	9.62	2.33	fair
BI.NASN	32.8	52.81	2009-049-21-53-45	-27.42	-176.33	96	137	25	PKSbc	4-25s	0.92	-73	8	1.64	0.97	-2.57	0	fair
BI.NASN	32.8	52.81	2009-049-21-53-45	-27.42	-176.33	96	137	25	SKKSac	4-25s	0.91	-61	17	1.95	1.13	-2.57	0	fair
BI.NASN	32.8	52.81	2009-059-14-33-06	-60.52	-24.8	211	112	15	SKKSac	5-20s	Null	Null	Null	Null	Null	14.93	9.9	goodNull
BI.NASN	32.8	52.81	2009-091-03-54-58	-3.52	144.1	92	93	10	SKSac	5-20s	0.97	-46	30	1.12	0.33	7.2	3.27	fair
BI.NASN	32.8	52.81	2009-106-14-57-06	-60.2	-26.86	212	113	20	SKSac	4-25s	Null	Null	Null	Null	Null	-2.57	0	fairNull
BI.NASN	32.8	52.81	2009-123-16-21-45	14.55	-91.14	318	122	108	SKKSac	5-20s	Null	Null	Null	Null	Null	9.21	7.42	goodNull
BI.NASN	32.8	52.81	2009-132-01-26-26	-5.66	149.54	91	99	89	SKSac	5-20s	0.96	-17	52	1.64	1.82	6.8	2.84	fair
BI.NASN	32.8	52.81	2009-153-02-17-03	-17.76	167.95	92	120	15	SKSac	5-20s	Null	Null	Null	Null	Null	15.49	8.11	goodNull
BI.NASN	32.8	52.81	2009-163-09-44-15	-17.61	167.81	92	120	15	SKSac	5-20s	0.98	-37	39	0.48	1.38	11.69	6.05	fair
BI.NASN	32.8	52.81	2009-193-06-12-47	-15.04	-70.44	275	126	198	SKSac	5-20s	0.98	-78	72	1.52	1.89	8.89	5.3	fair
BI.NASN	32.8	52.81	2009-274-06-13-33	-15.39	-173.25	79	135	14	PKSbc	4-25s	0.92	-74	22	1.33	0.82	-2.57	0	fair
BI.NASN	32.8	52.81	2009-281-08-34-36	-12.24	166.49	88	116	35	SKSac	5-20s	0.99	-16	28	1.6	1.33	16.34	4.97	fair
BI.NASN	32.8	52.81	2009-287-18-00-21	-14.91	-174.82	79	133	10	SKSac	5-20s	0.95	-45	11	1.6	0.38	6.92	1.35	fair
BI.NASN	32.8	52.81	2009-292-22-49-38	-15.36	-172.26	78	136	18	PKSbc	4-25s	0.92	-76	63	1.13	0.97	-2.57	0	fair
BI.NASN	32.8	52.81	2009-309-09-43-20	-52.29	160.7	134	126	10	SKSac	5-20s	0.97	-28	16	1.88	1.03	17.76	5.42	fair
BI.NASN	32.8	52.81	2009-313-10-44-55	-17.24	178.33	86	129	595	PKSbc	4-25s	0.9	-52	10	1.33	0.31	-2.57	0	good
BI.NASN	32.8	52.81	2009-318-19-44-29	-22.96	-66.64	264	126	220	SKKSac	4-25s	0.91	-62	30	0.72	0.67	-2.57	0	fair
BI.NASN	32.8	52.81	2009-326-07-48-20	-17.79	-178.43	85	132	522	PKSbc	5-20s	0.97	-61	18	1.18	0.45	10.65	2.21	good
BI.NASN	32.8	52.81	2009-326-07-48-20	-17.79	-178.43	85	132	523	SKKSac	4-25s	0.94	-70	37	0.92	1.44	-2.57	0	fair
BI.NASN	32.8	52.81	2009-326-07-48-20	-17.79	-178.43	85	132	523	SKSac	4-25s	0.96	-67	36	0.82	1.33	-2.57	0	fair
BI.NASN	32.8	52.81	2009-328-12-47-15	-20.71	-174.03	86	137	18	PKSbc	4-25s	0.92	-64	20	1.23	0.67	-2.57	0	fair
BI.NASN	32.8	52.81	2010-005-12-15-32	-9.02	157.55	90	107	15	SKSac	4-25s	0.94	-72	30	1.23	1.23	-2.57	0	fair
BI.NASN	32.8	52.81	2010-009-05-51-30	-9.13	157.63	90	107	12	SKSac	4-25s	0.96	-62	19	0.92	0.41	-2.57	0	fair
BI.NASN	32.8	52.81	2010-012-21-53-10	18.44	-72.57	306	107	13	SKKSac	5-20s	Null	Null	Null	Null	Null	11.17	6.95	goodNull
BI.NASN	32.8	52.81	2010-063-14-02-27	-13.57	167.23	89	118	176	SKSac	5-20s	0.99	-57	11	1.32	0.34	12.65	2.02	fair
BI.NASN	32.8	52.81	2010-070-14-39-43	-34.29	-71.89	252	134	11	PKSbc	5-20s	0.98	-31	23	1.22	0.89	11.55	4.47	fair
BI.NASN	32.8	52.81	2010-079-14-00-49	-3.36	152.25	88	100	415	SKSac	4-25s	0.93	-56	6	1.64	0.26	-2.57	0	good
BI.NASN	32.8	52.81	2010-107-23-15-22	-6.67	147.29	93	97	53	SKSac	4-25s	0.92	-60	6	1.64	0.31	-2.57	0	good
BI.NASN	32.8	52.81	2010-147-17-14-46	-13.7	166.64	89	117	31	SKSac	4-25s	0.94	-56	16	1.03	0.36	-2.57	0	fair
BI.NASN	32.8	52.81	2010-177-05-30-19	-10.63	161.45	89	111	35	SKSac	5-20s	0.99	-17	6	1.56	0.46	36.13	3.94	fair
BI.NASN	32.8	52.81	2010-181-04-31-02	-23.31	179.12	93	132	581	PKSbc	4-25s	0.93	-67	6	1.85	0.51	-2.57	0	good
BI.NASN	32.8	52.81	2010-181-04-31-02	-23.31	179.12	93	132	581	SKKSac	5-20s	0.96	-12	18	1.64	1.09	10.14	3.13	fair
BI.NASN	32.8	52.81	2010-199-13-04-09	-5.97	150.43	91	100	28	SKSac	4-25s	0.91	-63	5	1.85	0.31	-2.57	0	good
BI.NASN	32.8	52.81	2010-216-07-15-33	-5.49	146.82	92	96	220	SKSac	5-20s	0.95	-72	15	1.72	1.12	10.34	3.47	fair
BI.NASN	32.8	52.81	2010-227-15-09-29	-5.69	148.34	92	98	174	SKSac	5-20s	0.94	-58	9	2.1	0.53	6.23	1.21	fair
BI.NASN	32.8	52.81	2010-247-08-52-04	-17.37	-174	82	135	69	SKKSac	5-20s	0.92	-57	27	1.86	0.72	4.13	1.36	fair
BI.NASN	32.8	52.81	2010-252-07-28-01	-37.03	-73.41	249	136	16	SKKSac	5-20s	Null	Null	Null	Null	Null	7.51	4.32	goodNull
BI.NASN	32.8	52.81	2010-327-09-01-06	-5.96	148.97	92	98	68	SKSac	4-25s	0.93	-54	7	1.54	0.26	-2.57	0	good
BI.NASN	32.8	52.81	2010-336-03-12-09	-6	149.98	91	99	33	SKSac	4-25s	0.91	-50	12	1.54	0.41	-2.57	0	fair
BI.NASN	32.8	52.81	2010-347-01-14-42	-6.53	155.65	89	104	136	SKSac	4-25s	0.92	-51	11	1.64	0.41	-2.57	0	good
BI.NASN	32.8	52.81	2011-001-09-56-58	-26.8	-63.14	258	125	576	SKSac	5-20s	0.98	-63	28	0.7	0.43	10.55	2.71	fair
BI.NASN	32.8	52.81	2011-038-19-53-42	-7.15	155.18	89	104	415	SKSac	4-25s	0.93	-61	11	1.64	0.56	-2.57	0	good
BI.NASN	32.8	52.81	2011-065-12-31-59	-18.02	-69.36	271	126	118	SKKSac	5-20s	Null	Null	Null	Null	Null	10.36	4.38	goodNull
BI.NASN	32.8	52.81	2011-065-12-31-59	-18.02	-69.36	271	126	118	SKSac	5-20s	Null	Null	Null	Null	Null	13.78	6	goodNull
BI.NASN	32.8	52.81	2011-065-14-32-36	-56.42	-27.06	216	111	87	SKKSac	5-20s	Null	Null	Null	Null	Null	7.68	4.28	goodNull
BI.NASN	32.8	52.81	2011-090-00-11-58	-16.54	-177.52	83	132	16	PKSbc	4-25s	0.95	-74	20	1.13	0.72	-2.57	0	fair
BI.NASN	32.8	52.81	2011-093-14-07-09	-17.64	-178.59	85	132	551	PKSbc	5-20s	0.99	-67	10	1.58	0.24	9.34	1.62	good
BI.NASN	32.8	52.81	2011-093-14-07-09	-17.64	-178.59	85	132	551	SKSac	5-20s	0.95	-48	22	0.72	0.34	6.36	3.23	fair
BI.NASN	32.8	52.81	2011-097-13-11-22	17.21	-94.34	323	121	166	SKKSac	5-20s	Null	Null	Null	Null	Null	19.81	13.09	goodNull
BI.NASN	32.8	52.81	2011-097-13-11-22	17.21	-94.34	323	121	166	SKSac	5-20s	Null	Null	Null	Null	Null	8.01	8.44	goodNull
BI.NASN	32.8	52.81	2011-113-04-16-54	-10.38	161.2	89	111	79	SKSac	5-20s	0.94	-46	22	1.58	0.48	7.13	1.68	good
BI.NASN	32.8	52.81	2011-197-07-03-32	-22.43	-175	89	137	6	PKSbc	4-25s	0.94	-65	8	1.95	0.51	-2.57	0	good
BI.NASN	32.8	52.81	2011-236-17-46-11	-7.64	-74.53	285	125	147	SKKSac	4-25s	Null	Null	Null	Null	Null	-2.57	0	fairNull
BI.NASN	32.8	52.81	2011-236-17-46-11	-7.64	-74.53	285	125	147	SKSac	5-20s	Null	Null	Null	Null	Null	23.72	6.89	goodNull
BI.NASN	32.8	52.81	2011-236-23-06-17	-18.16	167.73	93	120	13	SKSac	4-25s	0.93	-66	24	1.23	1.03	-2.57	0	fair
BI.NASN	32.8	52.81	2011-246-04-48-57	-56.45	-26.85	216	111	84	SKKSac	5-20s	Null	Null	Null	Null	Null	12.9	5.93	goodNull
BI.NASN	32.8	52.81	2011-248-09-52-01	-15.29	-173.62	79	135	37	PKSbc	4-25s	0.95	-54	20	1.13	0.46	-2.57	0	good
BI.NASN	32.8	52.81	2011-252-19-41-34	49.53	-126.89	360	98	22	SKSac	5-20s	0.94	-76	67	1.1	1.6	7.35	3.72	fair
BI.NASN	32.8	52.81	2011-287-03-35-14	-6.57	147.88	93	98	37	SKSac	4-25s	0.96	-60	4	1.95	0.26	-2.57	0	good
BI.NASN	32.8	52.81	2011-348-05-04-58	-7.55	146.81	94	97	135	SKSac	4-25s	0.93	-56	5	1.64	0.26	-2.57	0	good
BI.NASN	32.8	52.81	2012-024-00-52-05	-24.98	178.52	95	132	580	SKSdf	5-20s	0.92	-38	23	1.16	0.46	4.12	1.86	fair
BI.NASN	32.8	52.81	2012-140-08-35-10	-25.73	-70.56	263	131	28	PKSbc	4-25s	0.92	-24	7	1.33	0.56	-2.57	0	good
BI.NASN	32.8	52.81	2012-188-02-28-22	-14.66	167.34	90	118	160	SKSac	5-20s	0.96	-52	11	1.42	0.3	11.78	1.81	good
BI.NASN	32.8	52.81	2012-189-03-35-28	-4.65	153.3	88	101	35	SKSac	4-25s	0.96	-61	5	1.74	0.26	-2.57	0	good
BI.NASN	32.8	52.81	2012-207-11-20-27	-9.69	159.73	89	109	20	SKSac	4-25s	0.93	-47	9	1.54	0.31	-2.57	0	good
BI.NASN	32.8	52.81	2012-210-20-03-56	-4.65	153.17	88	101	41	SKSac	4-25s	0.95	-61	4	1.85	0.26	-2.57	0	good
BI.NASN	32.8	52.81	2012-215-09-56-41	-4.65	153.28	88	101	46	SKSac	4-25s	0.91	-57	6	1.85	0.31	-2.57	0	good
BI.NASN	32.8	52.81	2012-274-16-31-35	1.93	-76.36	295	121	170	SKKSac	5-20s	Null	Null	Null	Null	Null	17.41	9.79	goodNull
BI.NASN	32.8	52.81	2013-188-20-30-06	-6.03	149.71	91	99	56	SKSac	5-20s	0.96	-58	11	1.68	0.47	9.67	1.62	good
BI.NASN	32.8	52.81	2013-207-07-07-15	-15.38	167.69	90	119	124	SKSac	5-20s	0.97	-61	37	1.1	1.14	8.28	2.97	fair
BI.NASN	32.8	52.81	2014-305-18-57-22	-19.69	-177.76	87	133	434	PKSbc	5-20s	0.95	-33	13	1.44	0.47	8.67	1.91	fair
[truncated: 5,641 more rows]
